# Supplementary material for: A direct Diels–Alder reaction of chitin derived 3-acetamido-5-acetylfuran
Source: Royal Society of Chemistry journal article supplement (doi:10.1039/d2gc00253a), 2022-01-01
Supplement: d2gc00253a1.pdf [file d2gc00253a1.pdf]

Supporting Information

## Direct Diels-Alder reaction of chitin derived 3-acetamido-5-acetylfuran

Juliana G. Pereira,<sup>[a]</sup> João M. J. M. Ravasco,<sup>[a]</sup> João R. Vale,<sup>[a]</sup> Fausto Queda,<sup>[b]</sup> Rafael F. A. Gomes\*<sup>[a]</sup>

*[a] Research Institute for Medicines (iMed.Ulisboa), Faculty of Pharmacy, Universidade de Lisboa, Av. Prof. Gama Pinto, 1649-003, Lisboa, Portugal*

*[b] AlmaScience Colab, Madan Parque, 2829-516 Caparica (Portugal)*

*Email: rafael.gomes@campus.ul.pt*

### Table of Contents

|                                                               |     |
|---------------------------------------------------------------|-----|
| General information                                           | S2  |
| General procedure A                                           | S2  |
| General procedure B                                           | S2  |
| General procedure C:                                          | S3  |
| Scope of 7-ONBs                                               | S4  |
| Scope of hemi-acylaminals                                     | S7  |
| Derivatization procedures                                     | S11 |
| General procedure for the retro-Diels-Alder studies of 7-ONBs | S16 |
| Computational Studies                                         | S20 |
| Copies of NMR spectra                                         | S27 |

**General information:**

All solvents were distilled prior to use. All reagents were used as received from commercial suppliers, unless otherwise stated. 3-acetamido-5-acetylfuran (3A5AF) was prepared according to Padovan's procedure.<sup>1</sup> *N*-(5-(1-hydroxyethyl)furan-3-yl)acetamide was prepared from 3A5AF according to Sperry's procedure.<sup>2</sup> Non-commercial maleimides were prepared in accordance with reported procedure.<sup>3</sup> <sup>1</sup>H and <sup>13</sup>C NMR spectra were acquired on Bruker MX300 spectrometer. HPLC analysis was performed on a Thermo Scientific Dionex Ultimate 3000 apparatus with a LPG-3400SD Pump, a UV MWD-3000(RS) detector and an autosampler ACC-3000, equipped with a 20  $\mu$ L loop, using a reversed-phase EC 250/4 Nucleodur 100-5 C18ec column (250 $\times$ 4 mm, 5  $\mu$ m) Thermo Scientific<sup>TM</sup> Dionex<sup>TM</sup>.

**General procedure A:**

To a solution of *N*-(5-acetylfuran-3-yl)acetamide (60 mg, 0.36 mmol) and the corresponding maleimide (1.2 eq, 0.43 mmol) in DMSO-*d*<sub>6</sub> (0.4 mL) was added a pH 4 aqueous solution (acetic acid-sodium acetate 0.1M, 0.4 mL). The reaction mixture was stirred at 50°C for 24 hours. The reaction mixture was cooled down to room temperature and extracted with ethyl acetate (5 x 5 mL). The combined organic layers were dried with anhydrous Mg<sub>2</sub>SO<sub>4</sub>, filtered, and concentrated under reduced pressure. The product was isolated by flash chromatography, yielding the pure product.

**General procedure B:**

To a solution of *N*-(5-acetylfuran-3-yl)acetamide (20 mg, 0.12 mmol) and the corresponding maleimide (1.2 eq, 0.14 mmol) in DMSO-*d*<sub>6</sub> (0.133 mL) was added pH 4 aqueous solution (acetic acid-sodium acetate 0.1M, 0.133 mL). The reaction mixture was stirred at 50°C for 24 hours. The reaction mixture was cooled down to room temperature and 2-mercaptopropanoic acid (0.14 mmol) was added and stirred for 15 minutes. The reaction mixture was extracted with ethyl acetate:NaHCO<sub>3</sub> saturated solution (5 x 5 mL). The combined organic layers were dried with anhydrous Mg<sub>2</sub>SO<sub>4</sub>, filtered, and concentrated under reduced pressure, yielding the pure products. In some cases, it was possible to observe traces of starting material that was not present in the crude <sup>1</sup>H-NMR evaluation, possible due to retro-Diels-Alder reaction.

Comparison of the scope from GPA and GPB:

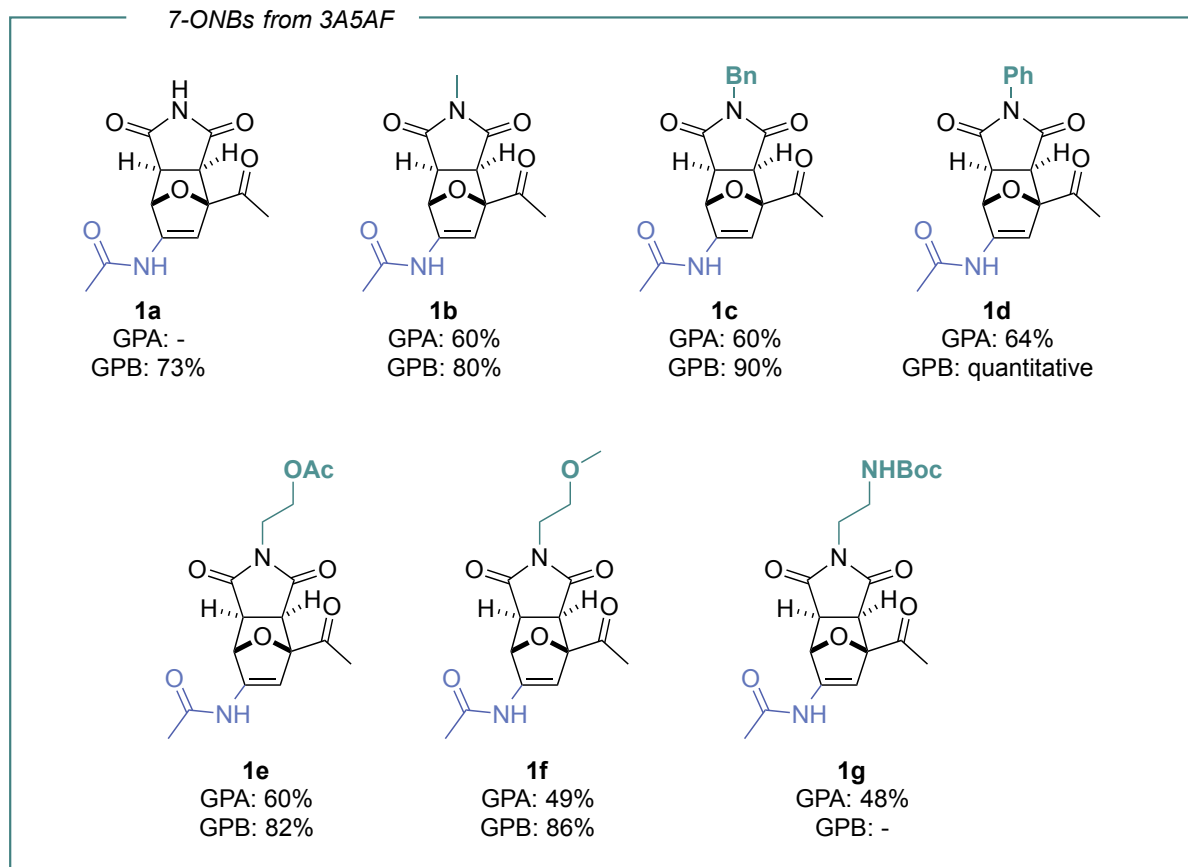

Figure 1. Isolated yield comparison of the scope from General procedure A and General procedure B.

**General procedure C:**

To a solution of *N*-(5-acetylfuran-3-yl)acetamide (6 mg, 0.036 mmol) and the corresponding maleimide (1.2 eq 0.043 mmol) in DMSO-*d*<sub>6</sub> (0.4 mL) was added a acetic acid-sodium acetate buffer solution 0.1 M (0.4 mL) at pH 2.6. The reaction mixture was stirred at 50°C for 24 hours. The reaction mixtures were cooled down to room temperature and washed with ethyl acetate:H<sub>2</sub>O (5 x 5 mL). The combined aqueous layers were concentrated under reduced pressure and further freeze dried, yielding the pure products.

### Scope of 7-ONBs:

#### ***N*-(7-acetyl-2-methyl-1,3-dioxo-2,3,3a,4,7,7a-hexahydro-1*H*-4,7-epoxyisoindol-5-yl)acetamide (1a)**

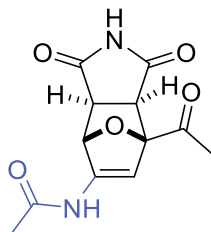

The title compound was prepared according to the general procedure A using 100 mg of 3A5AF. The product was obtained in 73% yield (115 mg) as a hygroscopic yellow solid characterized as a mixture of 2:8 of starting materials: **1a** due to retro-DA.

**<sup>1</sup>H NMR (300 MHz, (CD<sub>3</sub>)<sub>2</sub>SO)** δ 6.11 (s, 1H), 5.16 (s, 1H), 3.39 (d, *J* = 6.50 Hz, 1H), 3.11 (d, *J* = 6.52 Hz, 1H), 2.25 (s, 3H), 1.97 (s, 3H) ppm. **<sup>13</sup>C NMR (75 MHz, (CD<sub>3</sub>)<sub>2</sub>SO)** δ 202.9, 177.1, 176.1, 169.2, 169.1, 144.8, 110.4, 94.8, 80.1, 53.9, 50.3, 27.2, 23.4 ppm. **HRMS (ESI-MS)** *m/z* calculated for 279.09755 [M+H<sup>+</sup>], found 279.09771.

#### ***N*-(7-acetyl-2-methyl-1,3-dioxo-2,3,3a,4,7,7a-hexahydro-1*H*-4,7-epoxyisoindol-5-yl)acetamide (1b)**

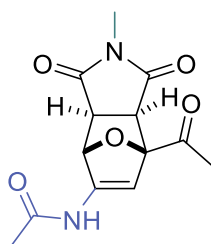

The title compound was prepared according to the general procedure B. The product was obtained in 80% yield (27 mg) as a pale yellow hygroscopic solid.

**<sup>1</sup>H NMR (300 MHz, (CD<sub>3</sub>)<sub>2</sub>SO)** δ 10.28 (s, 1H), 6.13 (s, 1H), 5.18 (s, 1H), 3.45 (d, *J* = 6.50 Hz, 1H), 3.18 (d, *J* = 6.49 Hz, 1H), 2.81 (s, 3H), 2.25 (s, 3H), 1.98 (s, 3H) ppm. **<sup>13</sup>C NMR (75 MHz, (CD<sub>3</sub>)<sub>2</sub>CO)** δ 203.0, 176.2, 175.2, 169.1, 145.9, 111.7, 95.7, 81.6, 53.7, 50.1, 27.0, 24.9, 23.5 ppm. **HRMS (ESI-MS)** *m/z* calculated for 279.09755 [M+H<sup>+</sup>], found 279.09771.

#### ***N*-(7-acetyl-2-benzyl-1,3-dioxo-2,3,3a,4,7,7a-hexahydro-1*H*-4,7-epoxyisoindol-5-yl)acetamide (1c)**

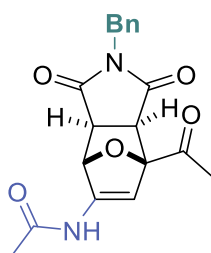

The title compound was prepared according to the general procedure B using 60 mg of *N*-(5-acetylfuran-3-yl)acetamide. The product was isolated with 90% yield (114 mg) as a white solid. m.p. 137-140°C.

**<sup>1</sup>H NMR (300 MHz, (CD<sub>3</sub>)<sub>2</sub>SO)** δ 10.30 (s, 1H), 7.35-7.20 (m, 5H), 6.14 (s, 1H), 5.22 (s, 1H), 4.55 (s, 2H), 3.50 (d, *J* = 6.47 Hz, 1H), 3.27 (d, *J* = 6.51 Hz, 1H), 2.16 (s, 3H), 1.99 (s, 3H) ppm. **<sup>13</sup>C NMR (75 MHz, (CD<sub>3</sub>)<sub>2</sub>CO)** δ 203.1, 175.8, 174.8, 169.0, 145.6, 136.8, 129.1, 128.3, 111.6, 95.6, 81.5, 53.5, 49.9, 42.5, 26.8, 23.3 ppm. **HRMS (ESI-MS)** *m/z* calculated for C<sub>19</sub>H<sub>19</sub>N<sub>2</sub>O<sub>5</sub> [M+H<sup>+</sup>] 355.12885, found 355.12867.

***N*-(7-acetyl-1,3-dioxo-2-phenyl-2,3,3a,4,7,7a-hexahydro-1*H*-4,7-epoxyisoindol-5-yl)acetamide (1d)**

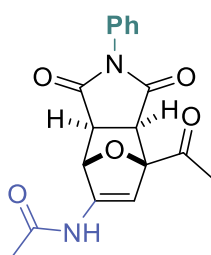

The title compound was prepared according to the general procedure B. The product was obtained in quantitative yield (41 mg) as a white solid. m.p. 145-148°C

**<sup>1</sup>H NMR (300 MHz, (CD<sub>3</sub>)<sub>2</sub>CO)** δ 7.51-7.38 (m, 3H), 7.27-7.24 (m, 2H), 6.27 (s, 1H), 5.40 (s, 1H), 3.59 (d, *J* = 6.60 Hz, 1H), 3.40 (d, *J* = 3.40 Hz, 1H), 2.28 (s, 3H), 2.07 (s, 3H) ppm. **<sup>13</sup>C NMR (75 MHz, (CD<sub>3</sub>)<sub>2</sub>CO)** δ 203.0, 175.4, 174.3, 169.2, 146.0, 133.4, 129.8, 129.3, 127.7, 111.9, 96.1, 82.1, 53.9, 50.2, 27.1, 23.5 ppm. **HRMS (ESI-MS)** *m/z* calculated for C<sub>18</sub>H<sub>17</sub>N<sub>2</sub>O<sub>5</sub> [M+H<sup>+</sup>] 341.11320, found 341.11290.

**2-(6-acetamido-4-acetyl-1,3-dioxo-1,3,3a,4,7,7a-hexahydro-2*H*-4,7-epoxyisoindol-2-yl)ethyl acetate (1e)**

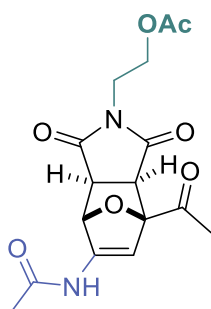

The title compound was prepared according to the general procedure B. The product was isolated with 82% yield (30.3 mg) as a yellow solid. m.p 79-81°C.

**<sup>1</sup>H NMR (300 MHz, (CD<sub>3</sub>)<sub>2</sub>SO)** δ 10.29 (s, 1H), 6.11 (s, 1H), 5.20 (s, 1H), 4.09-4.05 (m, 2H), 3.60 (td, *J* = 5.19 Hz, *J* = 1.11 Hz, 2H), 3.45 (d, *J* = 6.50 Hz, 1H), 3.20 (d, *J* = 6.52 Hz, 1H), 2.24 (s, 3H), 1.98 (s, 3H), 1.93 (s, 3H) ppm **<sup>13</sup>C NMR (75 MHz, (CD<sub>3</sub>)<sub>2</sub>CO)** δ 203.0, 175.9, 174.8, 169.0, 145.6, 111.4, 95.4,

81.4, 60.9, 53.3, 49.7, 38.1, 26.9, 23.2 ppm. **HRMS (ESI-MS)**  $m/z$  calculated for  $C_{16}H_{19}N_2O_7$  [ $M+H^+$ ] 351.11868, found 351.11812.

***N*-(7-acetyl-2-(2-methoxyethyl)-1,3-dioxo-2,3,3a,4,7,7a-hexahydro-1*H*-4,7-epoxyisoindol-5-yl)acetamide (1f)**

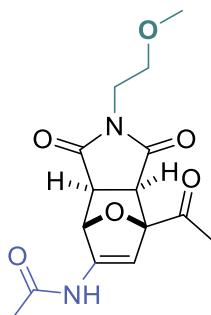

The title compound was prepared according to the general procedure B. The product was isolated with 86% yield (33 mg) as a yellow oil.

**$^1H$  NMR (300 MHz,  $(CD_3)_2SO$ )**  $\delta$  10.32 (s, 1H), 6.11 (s, 1H), 5.20 (s, 1H), 3.54-3.49 (m, 2H), 3.42-3.39 (m, 4H), 3.19 (s, 3H), 2.21 (s, 3H), 1.98 (s, 3H) ppm.  **$^{13}C$  NMR (75 MHz,  $(CD_3)_2CO$ )**  $\delta$  203.3, 175.9, 174.7, 169.0, 145.4, 111.5, 95.3, 81.3, 68.8, 58.1, 53.3, 49.5, 38.4, 26.7, 23.2 ppm. **HRMS (ESI-MS)**  $m/z$  calculated for compound  $C_{15}H_{19}N_2O_6$  [ $M+H^+$ ] 323.12376, found 323.12343.

***tert*-butyl(2-(6-acetamido-4-acetyl-1,3-dioxo-1,3,3a,4,7,7a-hexahydro-2*H*-4,7-epoxyisoindol-2-yl)ethyl)carbamate (1g)**

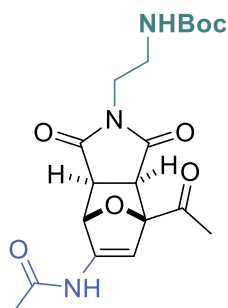

The compound was prepared according to the general procedure A. The crude mixture was isolated by flash chromatography using hexane:ethyl acetate (1:6) affording the product with 48% yield (48 mg) as an hygroscopic white solid characterized as a mixture of 8.6:1.4 of **1g**:starting materials due to retro-DA.

**$^1H$  NMR (300 MHz,  $(CD_3)_2SO$ )**  $\delta$  9.42 (s, 1H), 6.19 (s, 1H), 5.26 (s, 1H), 3.57-3.52 (m, 2H), 3.38 (d,  $J$  = 6.45 Hz), 3.25-3.18 (m, 3H), 2.23 (s, 3H), 1.38 (s, 9H) ppm.  **$^{13}C$  NMR (75 MHz,  $(CD_3)_2CO$ )**  $\delta$  203.2, 176.1, 175.1, 169.1, 156.6, 145.8, 111.6, 95.6, 81.6, 78.8, 53.6, 49.9, 39.3, 38.6, 28.5, 27.0, 23.4 ppm. **HRMS (ESI-MS)**  $m/z$  calculated for  $C_{19}H_{26}N_3O_7$  [ $M+H^+$ ] 408.17653, found 408.17634.

**Scope of Hemi-Acylaminals:**

***N*-(7-acetyl-5-hydroxy-1,3-dioxooctahydro-1*H*-4,7-epoxyisoindol-5-yl)acetamide (2a)**

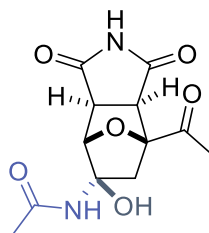

The title compound was prepared according to the general procedure C using 50 mg of 3A5AF. The product was isolated in quantitative yield (84 mg) as a white solid. m.p 140-143°C.

**<sup>1</sup>H NMR (300 MHz, (CD<sub>3</sub>)<sub>2</sub>SO)** δ 11.39 (s, 1H), 8.79 (s, 1H), 5.93 (s, 1H), 4.85 (s, 1H), 3.29 (d, *J* = 6.99 Hz, 1H), 3.10 (d, *J* = 6.95 Hz, 1H), 2.24 (d, *J* = 13.08 Hz, 1H), 2.16 (s, 3H), 1.88 (d, *J* = 13.17 Hz, 1H), 1.84 (s, 3H) ppm. **<sup>13</sup>C NMR (75 MHz, (CD<sub>3</sub>)<sub>2</sub>SO)** δ 203.2, 178.2, 176.9, 169.9, 90.6, 85.9, 85.8, 52.3, 47.8, 47.3, 27.2, 23.0 ppm. **HRMS (ESI-MS)** *m/z* calculated for C<sub>12</sub>H<sub>15</sub>N<sub>2</sub>O<sub>6</sub> [M+H<sup>+</sup>] 283.09246, found 283.09228.

***N*-(7-acetyl-5-hydroxy-2-methyl-1,3-dioxooctahydro-1*H*-4,7-epoxyisoindol-5-yl)acetamide (2b)**

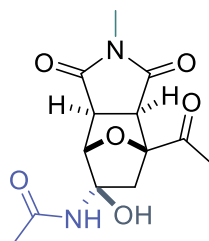

The compound was prepared according to the general procedure C. The product was isolated in quantitative yield (10.6 mg) as a yellow/brown oil.

**<sup>1</sup>H NMR (400 MHz, (CD<sub>3</sub>)<sub>2</sub>SO)** δ 8.89 (s, 1H), 4.85 (s, 1H), 3.37 (d, *J* = 6.89 Hz, 1H), 3.14 (d, *J* = 6.89 Hz, 1H), 2.79 (s, 3H), 2.30 (d, *J* = 13.09 Hz, 1H), 2.16 (s, 3H), 1.89 (d, *J* = 13.04 Hz, 1H), 1.84 (s, 3H) ppm. **<sup>13</sup>C NMR (100 MHz, (CD<sub>3</sub>)<sub>2</sub>SO)** δ 203.4, 176.7, 175.3, 170.0, 90.5, 85.9, 85.6, 51.0, 47.7, 46.1, 27.3, 24.8, 23.0 ppm. **HRMS (ESI-MS)** *m/z* calculated for C<sub>13</sub>H<sub>17</sub>N<sub>2</sub>O<sub>6</sub> [M+H<sup>+</sup>] 297.10811, found 297.10886.

***N*-(7-acetyl-2-benzyl-5-hydroxy-1,3-dioxooctahydro-1*H*-4,7-epoxyisoindol-5-yl)acetamide (2c)**

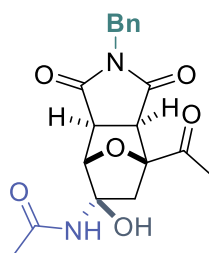

The title compound was prepared according to the general procedure C. The product was isolated with 79% yield (10.6 mg) as a white solid. No melting point is given due to decomposition observed at 160°C.

**<sup>1</sup>H NMR (300 MHz, (CD<sub>3</sub>)<sub>2</sub>SO)** δ 8.87 (s, 1H), 7.31-7.25 (m, 3H), 7.20 (d, *J* = 7.4 Hz, 2H), 6.03 (s, 1H), 4.91 (s, 1H), 4.54 (s, 2H), 3.42 (d, *J* = 6.92 Hz, 1H), 3.25 (d, *J* = 6.91 Hz, 1H), 2.30 (d, *J* = 13.09 Hz, 1H), 2.07 (s, 3H), 1.91 (d, *J* = 13.04 Hz, 1H), 1.85 (s, 3H) ppm. **<sup>13</sup>C NMR (100 MHz, (CD<sub>3</sub>)<sub>2</sub>SO)** δ 203.2, 176.5, 175.1, 170.0, 135.6, 128.5, 127.4, 127.0, 90.7, 85.8, 51.0, 47.9, 46.1, 41.6, 27.1, 23.0 ppm. **HRMS (ESI-MS)** *m/z* calculated for C<sub>19</sub>H<sub>21</sub>N<sub>2</sub>O<sub>6</sub>[M+H<sup>+</sup>] 373.13941, found 373.13972.

***N*-(7-acetyl-5-hydroxy-1,3-dioxo-2-phenyloctahydro-1*H*-4,7-epoxyisoindol-5-yl)acetamide (2d)**

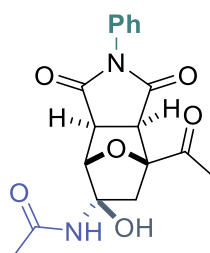

The title compound was prepared according to the general procedure C using a PBS buffer solution 0.1 M at pH 7. The product was isolated in quantitative yield (12.8 mg) as a hygroscopic yellow solid.

**<sup>1</sup>H NMR (400 MHz, (CD<sub>3</sub>)<sub>2</sub>SO)** δ 8.97 (s, 1H), 7.52-7.43 (m, 3H), 7.17 (d, *J* = 7.7, 2H), 4.99 (s, 1H), 3.32 (d, *J* = 7.0, 1H), 2.38 (d, *J* = 13.0, 1H), 2.22 (s, 3H), 1.97 (d, *J* = 13.4, 1H), 1.88 (s, 3H) ppm. **<sup>13</sup>C NMR (100 MHz, (CD<sub>3</sub>)<sub>2</sub>SO)** δ 203.4, 176.0, 174.6, 170.1, 132.1, 129.2, 128.7, 126.8, 90.9, 86.2, 86.0, 51.2, 44.5, 27.3, 23.0 ppm. **HRMS (ESI-MS)** *m/z* calculated for C<sub>18</sub>H<sub>19</sub>N<sub>2</sub>O<sub>6</sub> [M+H<sup>+</sup>] 359.12376, found 359.12447.

**2-(6-acetamido-4-acetyl-6-hydroxy-1,3-dioxooctahydro-2*H*-4,7-epoxyisoindol-2-yl)ethyl acetate (2e)**

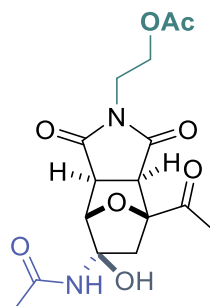

The title compound was prepared according to the general procedure C. The was isolated in 98% yield (13.1 mg) as a yellow/brown oil.

**<sup>1</sup>H NMR (300 MHz, (CD<sub>3</sub>)<sub>2</sub>SO)** δ 8.89 (s, 1H), 4.87 (s, 1H), 4.10-4.00 (m, 2H), 3.63-3.55 (m, 2H), 3.39 (d, *J* = 6.94 Hz, 1H), 3.16 (d, *J* = 6.93 Hz, 1H), 2.29 (d, *J* = 13.08 Hz, 1H), 2.16 (s, 3H), 1.89 (d, *J* = 13.11 Hz, 1H) ppm. **<sup>13</sup>C NMR (100 MHz, (CD<sub>3</sub>)<sub>2</sub>SO)** δ 203.3, 176.6, 175.1, 170.4, 170.0, 90.6, 85.9, 85.8, 60.2, 50.9, 47.8, 46.0, 37.5, 27.1, 23.0, 20.6 ppm. **HRMS (ESI-MS)** *m/z* calculated for C<sub>16</sub>H<sub>21</sub>N<sub>2</sub>O<sub>8</sub> [M+H<sup>+</sup>] 369.12924, found 369.12832.



***N*-(7-acetyl-5-hydroxy-2-(2-methoxyethyl)-1,3-dioxooctahydro-1*H*-4,7-epoxyisoindol-5-yl)acetamide (2f)**

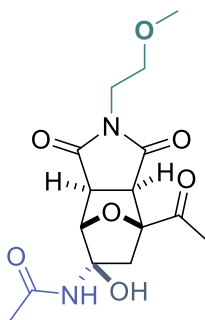

The title compound was prepared according to the general procedure C. The product was isolated with yield 84% (10.3 mg) as a yellow oil.

**<sup>1</sup>H NMR (400 MHz, (CD<sub>3</sub>)<sub>2</sub>SO)** δ 8.84 (s, 1H), 6.00 (s, 1H), 4.88 (s, 1H), 3.56 – 3.48 (m, 2H), 3.39 – 3.32 (m, 3H), 3.18 (s, 1H), 2.24 (s, 1H), 2.14 (s, 3H) ppm. **<sup>13</sup>C NMR (100 MHz, (CD<sub>3</sub>)<sub>2</sub>SO)** δ 203.8, 176.6, 175.1, 170.1, 90.5, 85.9, 85.9, 67.9, 57.9, 51.0, 47.9, 46.0, 37.9, 27.1, 23.0 ppm. **HRMS (ESI-MS)** *m/z* calculated for C<sub>15</sub>H<sub>21</sub>N<sub>2</sub>O<sub>7</sub> [M+H<sup>+</sup>] 341.13433, found 341.13396.

**3-(6-acetamido-4-acetyl-6-hydroxy-1,3-dioxooctahydro-2*H*-4,7-epoxyisoindol-2-yl)propanoic acid (2g)**

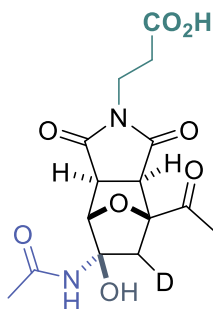

The title compound was prepared according to the general procedure A. The crude mixture was washed with ethyl acetate affording the product with 91% yield (116 mg) as a yellow oil.

**<sup>1</sup>H NMR (400 MHz, (CD<sub>3</sub>)<sub>2</sub>SO)** δ 8.86 (s, 1H), 4.86 (s, 1H), 3.53 (t, *J* = 7.27 Hz, 2H), 3.33 (d, *J* = 6.90 Hz, 1H), 3.13 (d, *J* = 6.90 Hz, 1H), 2.39 (t, *J* = 7.33 Hz, 2H), 2.25 (br s, 1H), 2.15 (s, 3H), 1.84 (s, 3H) ppm. **<sup>13</sup>C NMR (100 MHz, (CD<sub>3</sub>)<sub>2</sub>SO)** δ 203.7, 176.5, 175.1, 172.1, 170.3, 90.6, 86.0, 85.8, 51.0, 47.9, 46.1, 34.6, 31.9, 27.3, 23.0 ppm. **HRMS (ESI-MS)** *m/z* calculated for C<sub>15</sub>H<sub>18</sub>D<sub>1</sub>N<sub>2</sub>O<sub>8</sub> [M+H<sup>+</sup>] 356.11987, found 356.11966.

**2-(6-acetamido-4-acetyl-6-hydroxy-1,3-dioxooctahydro-2H-4,7-epoxyisoindol-2-yl)ethan-1-aminium 2,2,2-trifluoroacetate (2h)**

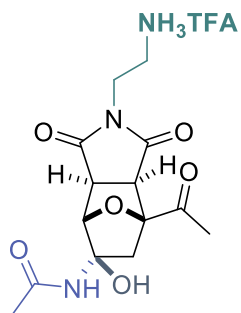

The compound was prepared according to the general procedure C. The product was obtained in quantitative yield with traces of maleimide (16 mg) as yellow/brown oil.

**<sup>1</sup>H NMR (300 MHz, (CD<sub>3</sub>)<sub>2</sub>SO)** δ 4.89 (s, 1H), 3.62-3.52 (m, 2H), 3.41 (d, *J* = 6.97 Hz, 1H), 3.14 (d, *J* = 6.97 Hz, 1H), 2.99-2.88 (m, 2H), 2.31-2.29 (m, 1H), 2.16 (s, 3H), 2.04-2.01 (m, 1H), 1.84 (s, 3H) ppm. **<sup>13</sup>C NMR (75 MHz, (CD<sub>3</sub>)<sub>2</sub>CO)** δ 204.5, 177.6, 176.2, 174.6, 174.1, 173.2, 172.2, 160.8, 160.3, 159.9, 159.5, 135.5, 91.3, 86.6, 86.3, 51.6, 46.9, 37.6, 36.8, 27.9, 23.4, 21.8 ppm. **HRMS (ESI-MS)** *m/z* calculated for C<sub>14</sub>H<sub>20</sub>N<sub>3</sub>O<sub>6</sub> [M+H<sup>+</sup>] 326.13466, found 326.13504.

## Derivatization procedures

### 7-acetyl-2-phenyltetrahydro-1H-4,7-epoxyisoindole-1,3,5(2H,4H)-trione (3)

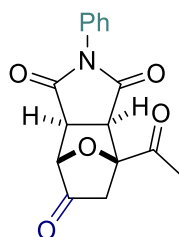

To a solution of **2d** (10 mg, 0.029 mmol) in DMF (590  $\mu$ L, 0.05 M) was added *p*-toluenesulfonic acid (5 mg, 0.029 mmol). The reaction mixture was stirred for 2h at 80°C. The crude was diluted with NaHCO<sub>3</sub> (sat. aq.) (5 mL) and extracted with ethyl acetate (5 mL  $\times$  3). The combined organic layers were dried with anhydrous Mg<sub>2</sub>SO<sub>4</sub>, filtered, and concentrated under reduced pressure. The product was isolated by flash chromatography using EtOAc:Hex (8:2) affording the product in 91% yield (8 mg) as a yellow oil.

**<sup>1</sup>H NMR (400 MHz, (CD<sub>3</sub>)<sub>2</sub>CO)**  $\delta$  7.53 – 7.42 (m, 3H), 7.30 – 7.27 (m, 2H), 4.88 (s, 1H), 4.02 (d, *J* = 7.16 Hz, 1H), 3.62 (d, *J* = 7.16 Hz, 1H), 2.87-2.82 (m, 1H), 2.68 (d, *J* = 17.76 Hz, 1H), 2.33 (s, 3H) ppm. **<sup>13</sup>C NMR (100 MHz, (CD<sub>3</sub>)<sub>2</sub>CO)**  $\delta$  205.3, 201.8, 174.6, 174.4, 133.3, 129.9, 129.6, 127.7, 92.6, 83.6, 52.3, 46.6, 44.2, 27.2 ppm. **HRMS (ESI-MS)** *m/z* calculated for C<sub>16</sub>H<sub>13</sub>NO<sub>5</sub> [M+H<sup>+</sup>] 300.08665, found 300.08631.

### 5-acetamido-7-acetyl-2-benzyl-6-hydroxy-1,3-dioxooctahydro-1H-4,7-epoxyisoindol-5-yl 3-methylbenzoate (4)

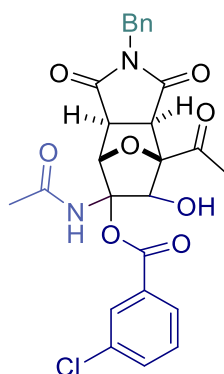

To a solution of *N*-(7-acetyl-2-benzyl-1,3-dioxo-2,3,3a,4,7,7a-hexahydro-1H-4,7-epoxyisoindol-5-yl)acetamide (20 mg, 0.056 mmol) in dichloromethane (565  $\mu$ L, 0.1 M) was added 3-chloroperbenzoic acid 50-55% (24 mg, 0.068 mmol). The reaction mixture was stirred overnight at 40°C. The reaction mixture was cooled down to 0°C to precipitate the *m*-CPBA/3-chlorobenzoic acid. The crude mixture was washed with a saturated solution of Na<sub>2</sub>S<sub>2</sub>O<sub>3</sub> and extracted with dichloromethane (5 $\times$ 5 mL) and then washed with a saturated solution of NaHCO<sub>3</sub>. The combined organic layers were dried with anhydrous Mg<sub>2</sub>SO<sub>4</sub>, filtered, and concentrated under reduced pressure affording 5-acetamido-7-acetyl-

2-benzyl-6-hydroxy-1,3-dioxooctahydro-1*H*-4,7-epoxyisoindol-5-yl 3-methylbenzoate with 58% yield (16.5 mg) as a pale yellow hygroscopic solid.

**<sup>1</sup>H NMR (400 MHz, (CD<sub>3</sub>)<sub>2</sub>CO)** δ 8.03 (br, 1H), 7.92-7.89 (m, 2H), 7.70-7.68 (m, 1H), 7.55 (t, *J* = 7.78 Hz, 1H), 7.34-7.25 (m, 5H), 5.39 (s, 1H), 5.30 (s, 1H), 4.68-4.59 (m, 2H), 3.77 (d, *J* = 6.94 Hz, 1H), 3.52 (d, *J* = 6.96 Hz, 1H), 2.21 (s, 3H), 2.01 (s, 3H) ppm. **<sup>13</sup>C NMR (100 MHz, (CD<sub>3</sub>)<sub>2</sub>CO)** δ 200.6, 176.2, 174.6, 171.6, 165.1, 136.5, 134.8, 134.2, 131.7, 131.3, 129.9, 129.2, 128.8, 128.3, 128.2, 93.4, 88.2, 87.1, 82.8, 49.6, 46.5, 42.9, 28.1, 23.1 ppm. **HRMS (ESI-MS)** *m/z* calculated for C<sub>26</sub>H<sub>24</sub>ClN<sub>2</sub>O<sub>8</sub> [M+H<sup>+</sup>] 527.12157, found 527.12225.

#### ***N*-(7-acetyl-1,3-dioxo-2-phenyloctahydro-1*H*-4,7-epoxyisoindol-5-yl)acetamide (5)**

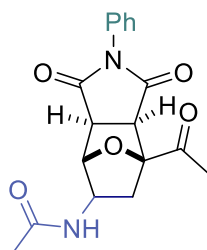

To a solution of *N*-(7-acetyl-1,3-dioxo-2-phenyl-2,3,3a,4,7,7a-hexahydro-1*H*-4,7-epoxyisoindol-5-yl)acetamide (20 mg, 0.059 mmol) in methanol (0.1 M) was added palladium on carbon (6.25 mg, Pd/C 10% w/w). The reaction was stirred overnight at 8 bar of H<sub>2</sub> after which the crude mixture was filtered through celite. The solvent was evaporated under reduced pressure. The product was isolated by flash chromatography using EtOAc:MeOH (4%) affording *N*-(7-acetyl-1,3-dioxo-2-phenyloctahydro-1*H*-4,7-epoxyisoindol-5-yl)acetamide in 80% yield (16 mg) as an orange hygroscopic solid.

**<sup>1</sup>H NMR (300 MHz, (CD<sub>3</sub>)<sub>2</sub>CO)** δ 7.51-7.38 (m, 3H), 7.26-7.23 (m, 2H), 5.03 (d, *J* = 4.84 Hz, 1H), 4.31-4.22 (m, 1H), 3.69 (d, *J* = 7.19 Hz, 1H), 3.63 (d, *J* = 7.19 Hz, 1H), 2.31 (dd, *J* = 13.08 Hz, *J* = 11.44 Hz, 1H), 2.23 (s, 3H), 1.96-1.90 (m, 4H) ppm. **<sup>13</sup>C NMR (75 MHz, (CD<sub>3</sub>)<sub>2</sub>CO)** δ 204.0, 177.1, 175.1, 170.9, 133.4, 129.8, 129.3, 127.6, 93.4, 82.4, 53.4, 51.4, 45.6, 37.9, 27.4, 22.7 ppm. **HRMS (ESI-MS)** *m/z* calculated for C<sub>18</sub>H<sub>19</sub>N<sub>2</sub>O<sub>5</sub> [M+H<sup>+</sup>] 343.12885, found 343.12890.

#### ***Diels-Alder reaction of the 3A5AF alcohol.***

#### ***N*-(7-(1-hydroxyethyl)-1,3-dioxo-2-phenyl-2,3,3a,4,7,7a-hexahydro-1*H*-4,7-epoxyisoindol-5-yl)acetamide (8)**

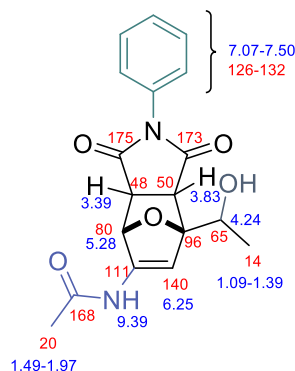

To a solution of *N*-(5-(1-hydroxyethyl)furan-3-yl)acetamide (20 mg, 0.12 mmol) in a mixture of water:acetonitrile 8:2 (1.2 mL) was added *N*-phenyl-maleimide (24 mg, 0.14 mmol, 1.2 eq). The reaction was stirred at room temperature for 5 minutes. 2-mercaptopropanoic acid (0.14 mmol) was added and the mixture was further stirred for 15 minutes. The reaction mixture was extracted with ethyl acetate:NaHCO<sub>3</sub> saturated solution (3 x 3 mL). The combined organic layers were dried with anhydrous Mg<sub>2</sub>SO<sub>4</sub>, filtered, and concentrated under reduced pressure, yielding *N*-(7-(1-hydroxyethyl)-1,3-dioxo-2-phenyl-2,3,3a,4,7,7a-hexahydro-1H-4,7-epoxyisoindol-5-yl)acetamide as a white powder in 99% yield (40 mg). The product was characterized a mixture of 4 diastereoisomers (*endo*-(R), *endo*-(S), *exo*-(R), *exo*-(S)).

**<sup>1</sup>H NMR (300 MHz, (CD<sub>3</sub>)<sub>2</sub>CO)** δ 9.39 (s, 1H), 7.50 – 7.36 (m, 3H), 7.28 – 7.24 (m, 1H), 7.09 – 7.07 (m, 1H), 6.29 – 6.20 (s, 1H), 5.30 – 5.26 (s, 1H), 4.31 – 4.17 (m, 1H), 3.90 – 3.76 (m, 1H), 3.43 – 3.36 (m, 1H), 1.97 – 1.95 and 1.37 – 1.51 (m, 3H), 1.09 – 1.36 (3H) ppm. **<sup>13</sup>C NMR (75 MHz, (CD<sub>3</sub>)<sub>2</sub>CO)** δ 175.1, 175.0, 174.9 (× 2), 174.5, 173.9, 173.3, 173.1, 168.1 (× 4), 144.5, 144.3, 141.9, 141.5, 132.8, 132.7 (× 2), 132.6, 128.8, 128.7, 128.7, 128.4, 128.3, 128.2, 127.3, 127.3, 126.8, 111.4, 111.3, 109.8, 109.2, 96.8, 95.9 (× 2), 95.8, 80.9, 80.7, 79.0, 78.9, 66.9, 65.9, 65.6, 65.1, 51.2, 50.7, 50.5, 484.9, 48.8, 48.7, 47.7, 22.6, 22.5, 18.7, 18.5, 17.8, 14.7, 13.6, 13.1 ppm. **HRMS (ESI-MS)** *m/z* calculated for C<sub>18</sub>H<sub>18</sub>N<sub>2</sub>O<sub>5</sub> [M+H<sup>+</sup>] 343.12885, found 343.12855.

### Competitive reaction of 3A5AF and acetylfuran (AF)

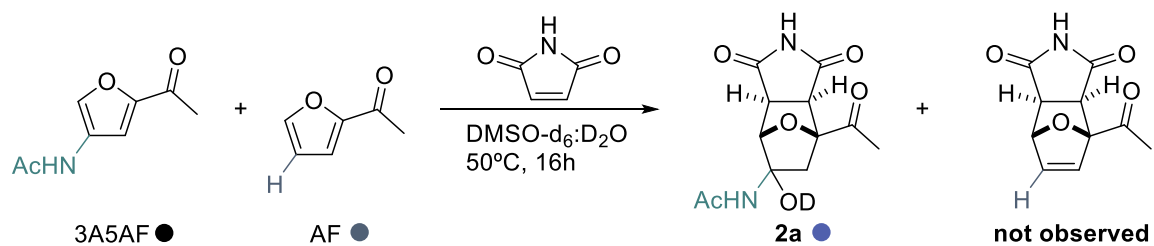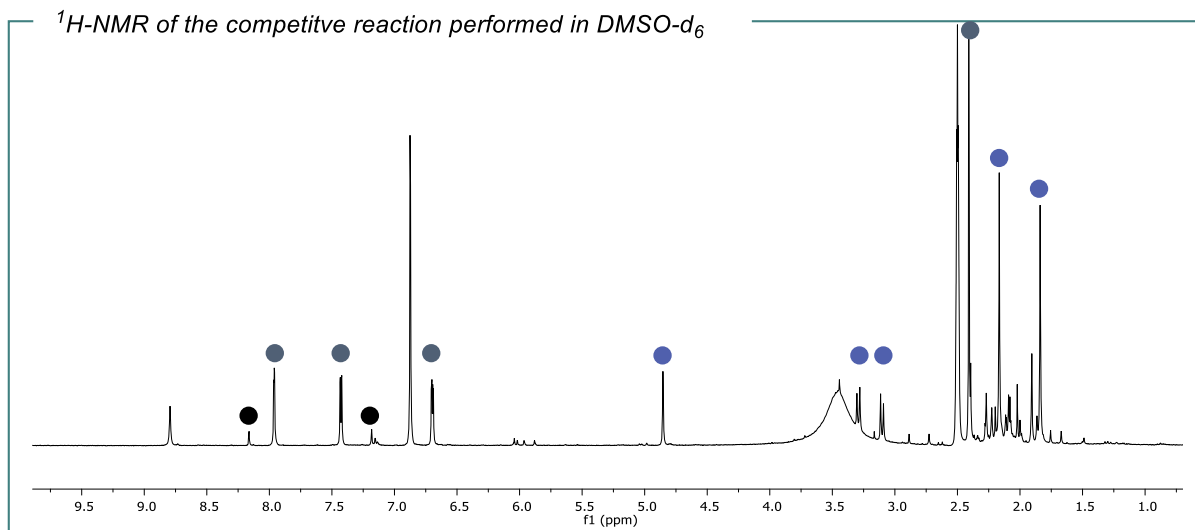

Figure S2. Competitive reaction of 3A5AF and AF. No 7-ONB derived from AF was detected, highlighting the remarkable effect of the 3-amido group.

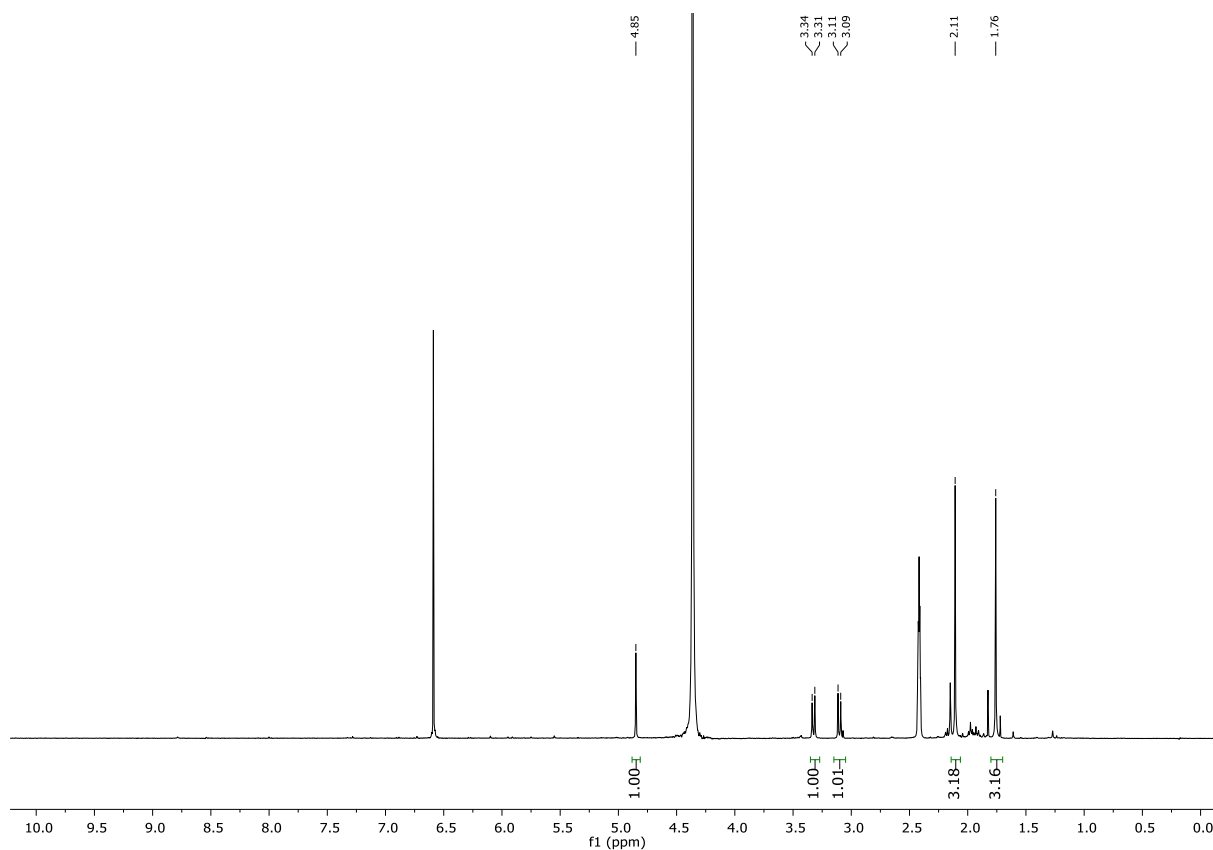

Figure S3. <sup>1</sup>H-NMR of the crude reaction mixture for the preparation of 2a.

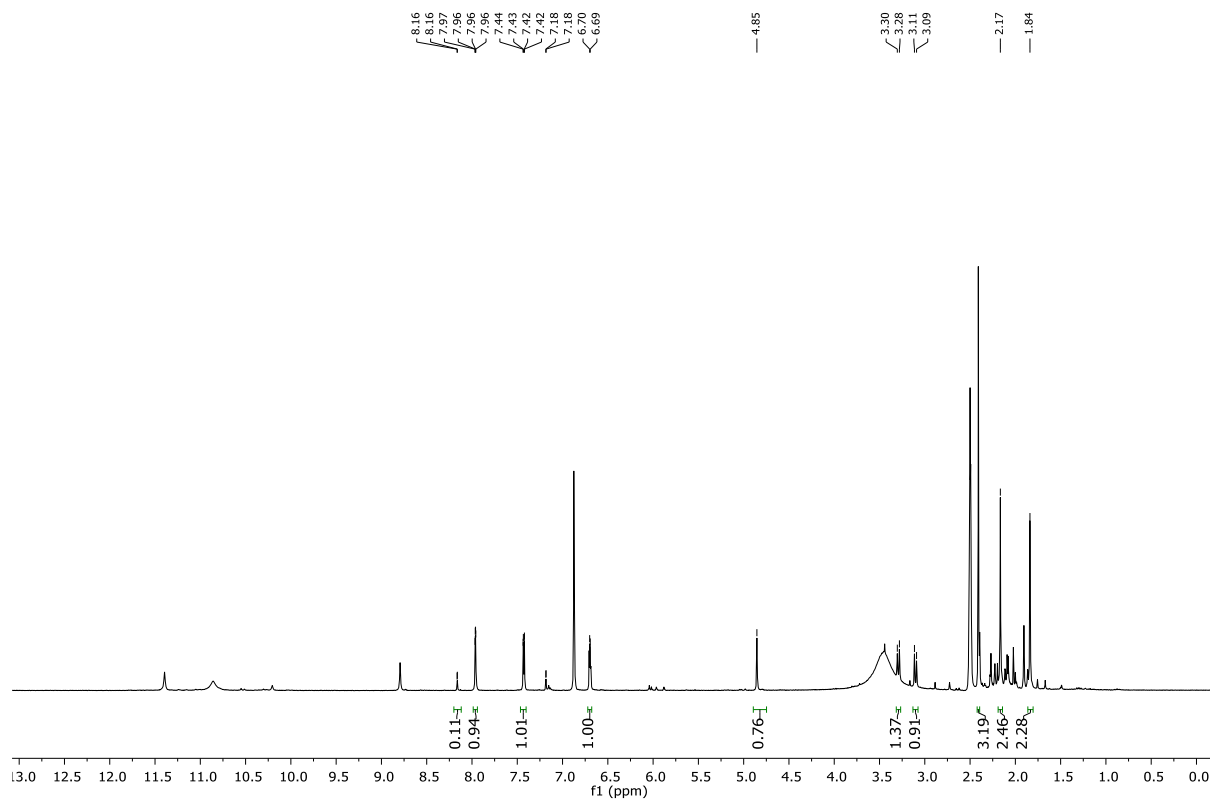

Figure S4. <sup>1</sup>H-NMR of the crude reaction mixture for the competitive assay of 3A5AF and AF.

## General procedure for the retro-Diels-Alder studies of 7-ONBs

A solution of *N*-(7-acetyl-2-benzyl-5-hydroxy-1,3-dioxooctahydro-1*H*-4,7-epoxyisoindol-5-yl)acetamide in DMSO-*d*<sub>6</sub> (45 mM) was stirred overnight at 80°C or 150°C. The conversion to 3A5AF was analyzed at different times (5 min – 20 h) by HPLC.

Each HPLC sample was diluted to final concentration of 1mM. The injection volume was 20 µL and the flow rate was set to 1 mL/min.

## Examples of HPLC chromatograms

### 3A5AF

| Injection Details           |                        |                          |                 |
|-----------------------------|------------------------|--------------------------|-----------------|
| <i>Injection Name:</i>      | <b>3A5AF_1mM</b>       | <i>Run Time (min):</i>   | <b>27.00</b>    |
| <i>Vial Number:</i>         | <b>GC1</b>             | <i>Injection Volume:</i> | <b>20.00</b>    |
| <i>Injection Type:</i>      | <b>Unknown</b>         | <i>Channel:</i>          | <b>UV_VIS_4</b> |
| <i>Calibration Level:</i>   |                        | <i>Wavelength:</i>       | <b>220</b>      |
| <i>Instrument Method:</i>   | <b>TCOS_95H2O5ACN</b>  | <i>Bandwidth:</i>        | <b>4</b>        |
| <i>Processing Method:</i>   | <b>JMR_Process</b>     | <i>Dilution Factor:</i>  | <b>1.0000</b>   |
| <i>Injection Date/Time:</i> | <b>09/Apr/21 12:48</b> | <i>Sample Weight:</i>    | <b>1.0000</b>   |

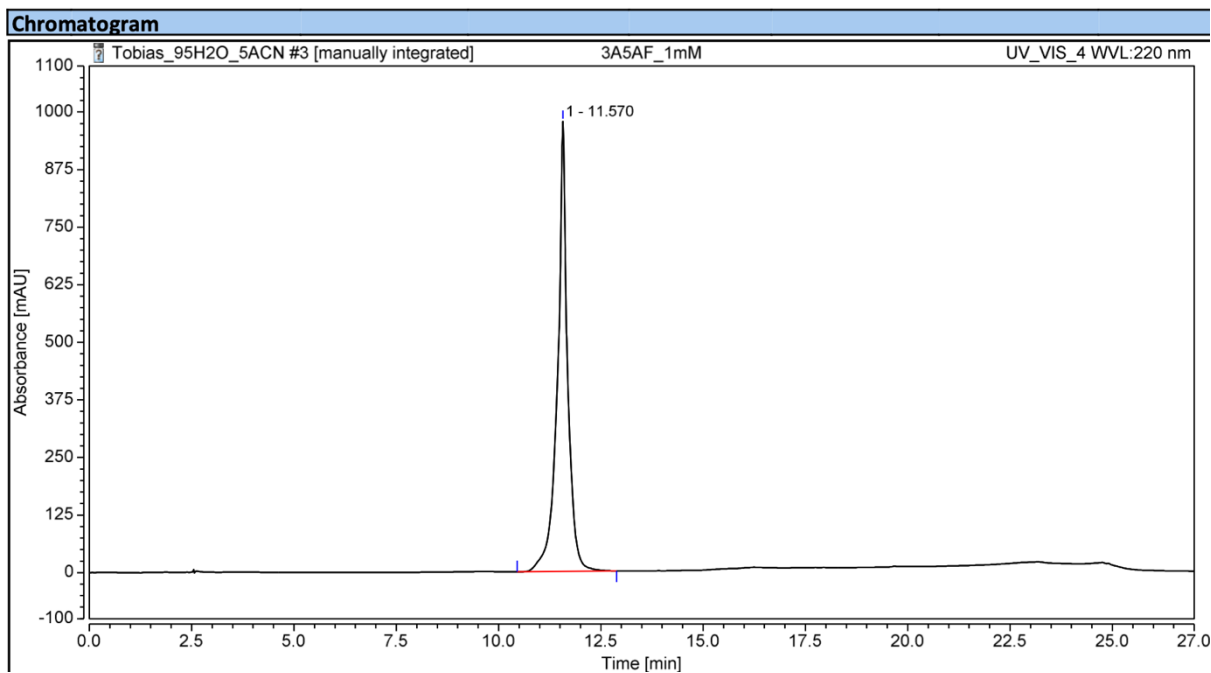



*N*-(7-acetyl-2-benzyl-5-hydroxy-1,3-dioxooctahydro-1*H*-4,7-epoxyisoindol-5-yl)acetamide

| Injection Details    |                           |                         |
|----------------------|---------------------------|-------------------------|
| Injection Name:      | JP722_Padrao_1mM_29112021 | Run Time (min): 27.00   |
| Vial Number:         | RD4                       | Injection Volume: 20.00 |
| Injection Type:      | Unknown                   | Channel: UV_VIS_4       |
| Calibration Level:   |                           | Wavelength: 220         |
| Instrument Method:   | TCOS_95H2O5ACN            | Bandwidth: 4            |
| Processing Method:   | FBBA                      | Dilution Factor: 1.0000 |
| Injection Date/Time: | 29/Nov/21 17:41           | Sample Weight: 1.0000   |

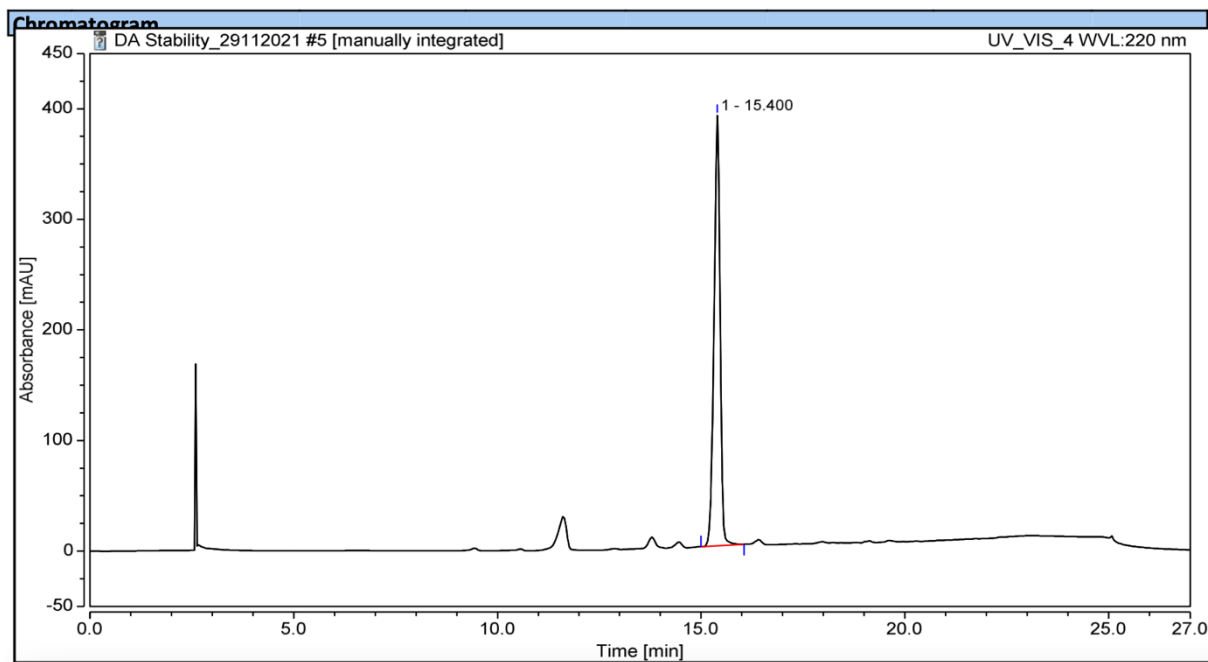

N-benzyl-maleimide

| Injection Details    |                         |                   |          |
|----------------------|-------------------------|-------------------|----------|
| Injection Name:      | Maleimide - Bz_29112021 | Run Time (min):   | 27.00    |
| Vial Number:         | RD5                     | Injection Volume: | 20.00    |
| Injection Type:      | Unknown                 | Channel:          | UV_VIS_4 |
| Calibration Level:   |                         | Wavelength:       | 220      |
| Instrument Method:   | TCOS_95H2O5ACN          | Bandwidth:        | 4        |
| Processing Method:   | FBBA                    | Dilution Factor:  | 1.0000   |
| Injection Date/Time: | 29/Nov/21 18:09         | Sample Weight:    | 1.0000   |

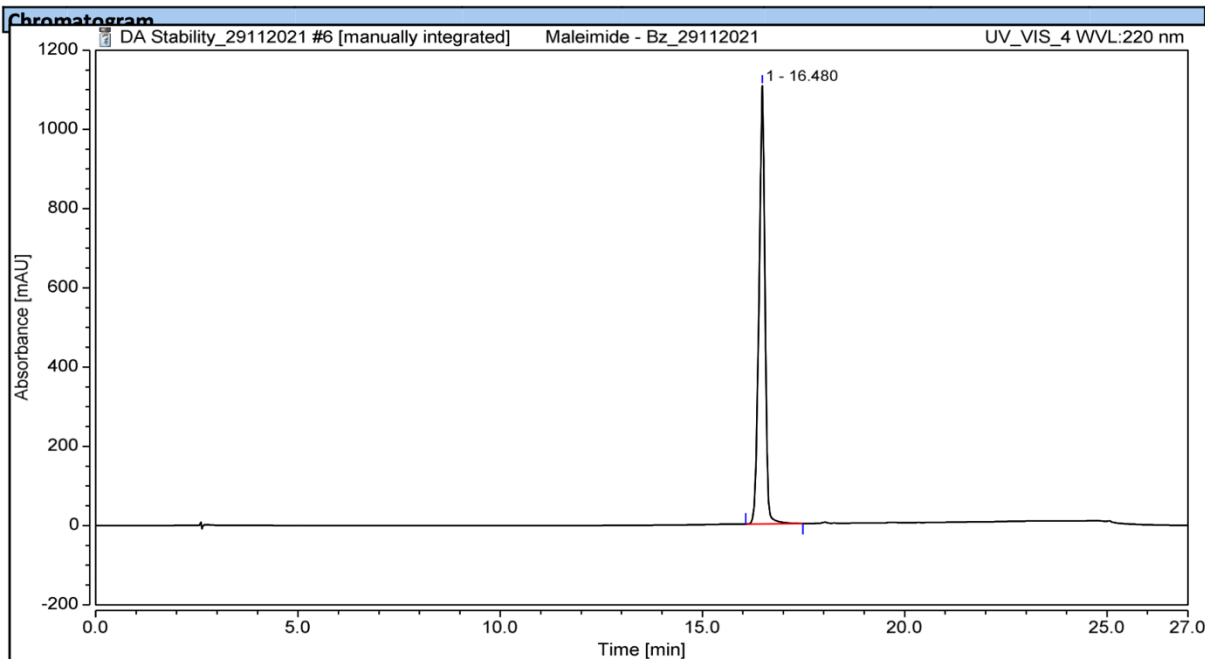

150°C – 5 min

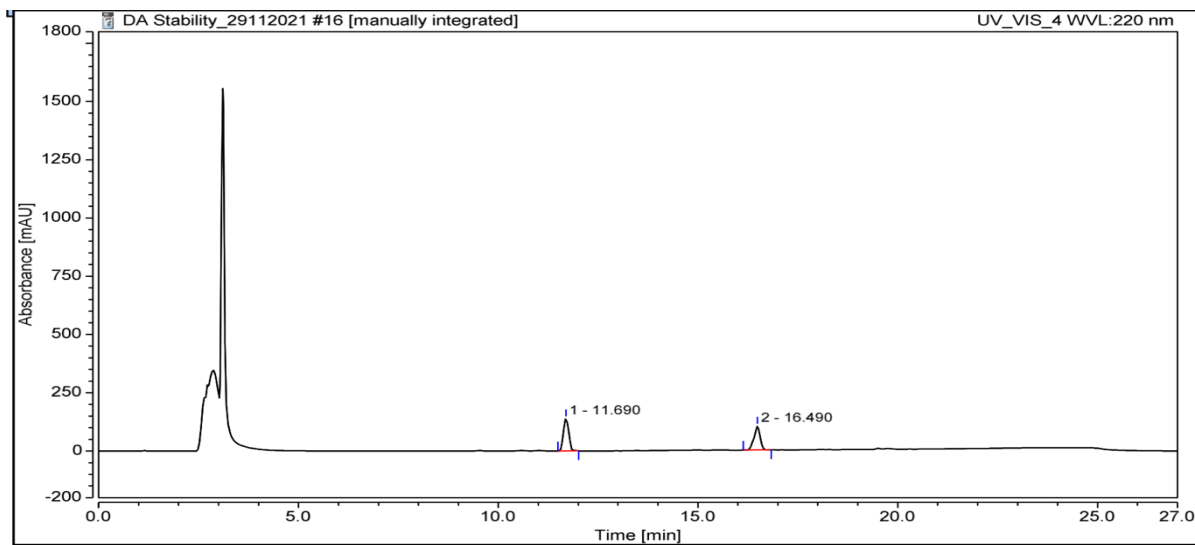

## Computational studies

Geometry optimizations and frequency calculations were carried out using Gaussian 09 software, Revision D.01. Vibrational frequencies and intensities were calculated at the M06L/6-31G(d) level of theory, since such functional/basis-set combination was reported to provide a good energetics accuracy cycloadditions. All the geometry optimizations were carried out at the M06L level of theory with the 6-31G(d) basis set. All of the optimized geometries were verified by frequency computations as minima (zero imaginary frequencies) or transition states (a single imaginary frequency corresponding to the desired reaction coordinate). Single-point energy calculations on the optimized geometries were then evaluated using the same functional (M06L) and the 6-311+G(d,p) basis set. Solvent effects in water were evaluated at the M06L/6-311+G(d,p) level with a self-consistent reaction field (SCRF) using the CPCM model on the gas-phase-optimized structures. Graphical representation of the optimized geometries was generated by using CYLView.

**Table S 1-** Summary of the calculations performed at M06L/6-311+G(d,p)/SMD(water)// M06L/6-31G(d) level of theory for pre-complexes, TS and products

|                         | M06L/6-311+G(d,p)/SMD(water)// M06L/6-31G(d) |                             |
|-------------------------|----------------------------------------------|-----------------------------|
|                         | $\Delta G$ (H)                               | $\Delta G_{rel}$ (kcal/mol) |
| Pre-complex HMF endo    | -817.130151221                               | 0.0                         |
| TS HMF endo             | -817.094824575                               | 22.2                        |
| Product HMF endo        | -817.132685973                               | -1.6                        |
| <hr/>                   |                                              |                             |
| Pre-complex HMF exo     | -817.127813393                               | 0.0                         |
| TS HMF exo              | -817.092804827                               | 22.0                        |
| Product HMF exo         | -817.134039245                               | -3.9                        |
| <hr/>                   |                                              |                             |
| Pre-complex ketone endo | -741.917097284                               | 0.0                         |
| TS ketone endo          | -741.883791001                               | 20.9                        |
| Product ketone endo     | -741.921057098                               | -2.5                        |
| <hr/>                   |                                              |                             |
| Pre-complex ketone exo  | -741.882658850                               | 0.0                         |
| TS ketone exo           | -741.916211304                               | 21.1                        |
| Product ketone exo      | -741.925767059                               | -6.0                        |
| <hr/>                   |                                              |                             |
| Pre-complex 1 endo      | -949.874802400                               | 0.0                         |
| TS 1 endo               | -949.845996720                               | 18.1                        |
| Product 1 endo          | -949.884813582                               | -6.3                        |
| <hr/>                   |                                              |                             |
| Pre-complex VI          | -949.876308590                               | 0.0                         |
| TS VI                   | -949.846201949                               | 18.9                        |
| Product VI              | -949.889029967                               | -8.0                        |

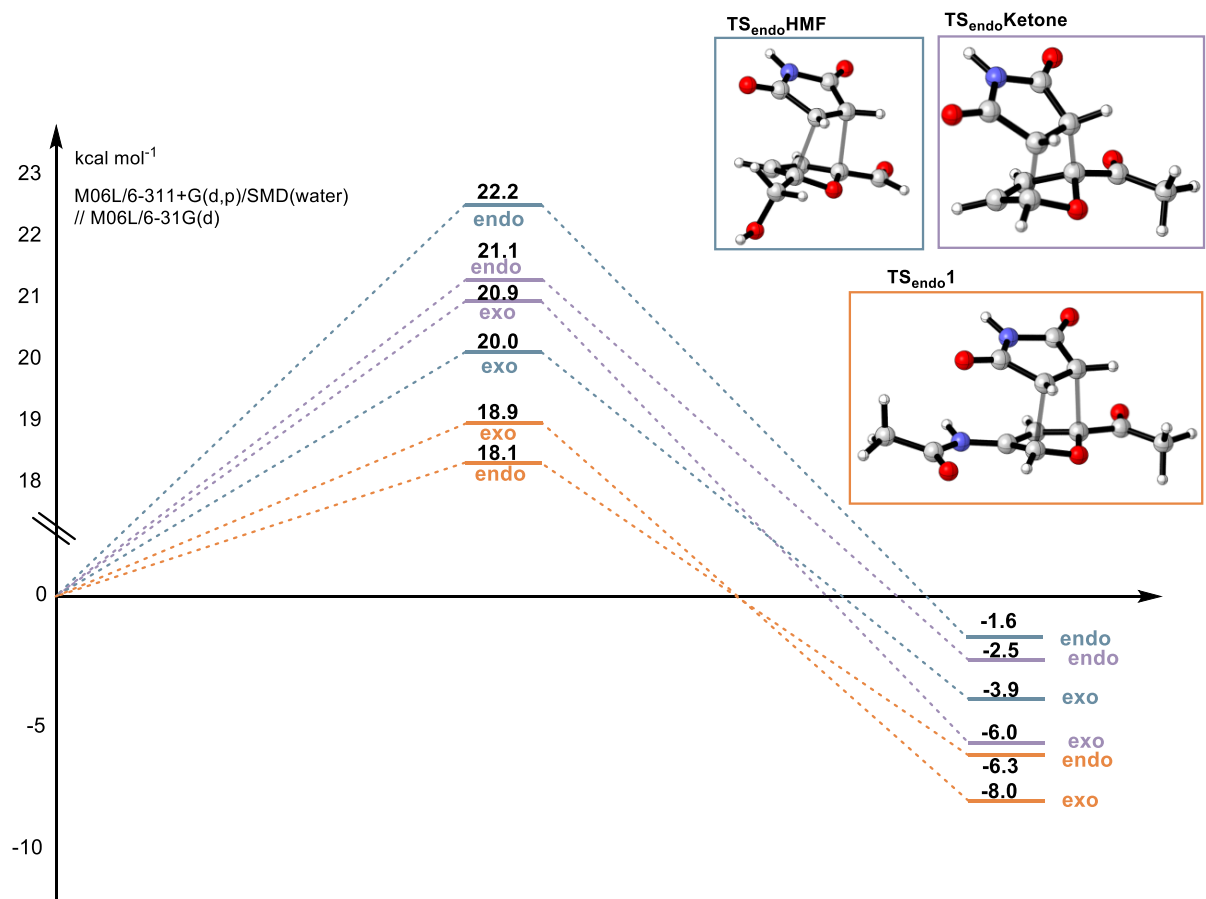

## Cartesian coordinates

### HMF R endo

SCF energy = -817.271491448 Hartree

Free energy correction= 0.141340227 Hartree

|   |              |              |              |
|---|--------------|--------------|--------------|
| 6 | -1.301979000 | -0.494729000 | 1.288827000  |
| 6 | 0.059287000  | -0.888883000 | 1.409204000  |
| 6 | -1.739617000 | -0.999105000 | 0.094919000  |
| 6 | 0.352338000  | -1.599425000 | 0.277825000  |
| 8 | -0.731098000 | -1.677831000 | -0.523612000 |
| 6 | -3.014098000 | -0.909720000 | -0.609525000 |
| 8 | -3.955939000 | -0.271222000 | -0.195297000 |
| 1 | -3.054273000 | -1.467196000 | -1.565958000 |
| 6 | 1.606273000  | -2.290856000 | -0.171861000 |
| 8 | 2.690934000  | -1.938388000 | 0.643278000  |
| 1 | -1.897073000 | 0.092671000  | 1.973818000  |
| 1 | 0.746764000  | -0.693929000 | 2.218625000  |
| 1 | 1.470341000  | -3.375593000 | -0.092563000 |
| 1 | 1.785051000  | -2.061252000 | -1.232005000 |
| 1 | 3.032595000  | -1.092309000 | 0.309721000  |
| 6 | 0.484395000  | 0.989768000  | -1.528545000 |
| 6 | -0.497057000 | 1.704160000  | -0.978428000 |
| 6 | 1.697576000  | 1.081732000  | -0.650341000 |
| 6 | 0.015926000  | 2.329813000  | 0.291365000  |
| 7 | 1.360578000  | 1.948239000  | 0.371938000  |
| 8 | 2.757227000  | 0.507235000  | -0.784753000 |
| 8 | -0.573964000 | 3.008802000  | 1.087845000  |
| 1 | 0.480213000  | 0.394918000  | -2.432395000 |
| 1 | -1.516664000 | 1.854436000  | -1.309515000 |
| 1 | 1.953460000  | 2.145282000  | 1.166378000  |

### HMF TS endo

SCF energy = -817.239079386 Hartree

Free energy correction= 0.144254811 Hartree

Imaginary Frequency= -508.2679  $\text{icm}^{-1}$

|   |              |              |              |
|---|--------------|--------------|--------------|
| 6 | -0.459597000 | -0.821789000 | 1.339961000  |
| 6 | 0.820829000  | -0.344818000 | 1.306266000  |
| 6 | -0.697312000 | -1.361194000 | 0.046801000  |
| 6 | 1.304552000  | -0.590576000 | -0.016784000 |
| 8 | 0.493199000  | -1.533109000 | -0.588260000 |
| 6 | -1.835886000 | -2.189533000 | -0.400304000 |
| 8 | -2.859784000 | -2.270696000 | 0.230252000  |
| 1 | -1.683846000 | -2.704884000 | -1.368694000 |
| 6 | 2.734114000  | -0.541365000 | -0.452135000 |
| 8 | 3.477984000  | -1.420904000 | 0.363501000  |
| 1 | -1.211482000 | -0.729261000 | 2.111570000  |
| 1 | 1.350281000  | 0.228880000  | 2.054802000  |
| 1 | 2.783626000  | -0.818921000 | -1.514641000 |
| 1 | 3.065828000  | 0.501737000  | -0.346207000 |
| 1 | 4.413866000  | -1.317063000 | 0.142377000  |
| 6 | 0.378341000  | 0.906182000  | -1.061954000 |
| 6 | -0.964304000 | 0.496949000  | -1.061996000 |
| 6 | 0.500736000  | 2.081267000  | -0.141072000 |
| 6 | -1.718966000 | 1.383799000  | -0.126822000 |
| 7 | -0.758219000 | 2.244442000  | 0.424168000  |
| 8 | 1.487311000  | 2.732755000  | 0.112035000  |
| 8 | -2.893876000 | 1.388993000  | 0.139677000  |
| 1 | 1.032147000  | 0.853368000  | -1.925372000 |
| 1 | -1.483850000 | 0.042988000  | -1.896377000 |
| 1 | -0.972753000 | 2.942223000  | 1.123963000  |

## HMF P endo

SCF energy = -817.281099159 Hartree

Free energy correction= 0.148413186 Hartree

|   |              |              |              |
|---|--------------|--------------|--------------|
| 6 | -0.436608000 | -0.799033000 | 1.323048000  |
| 6 | 0.827177000  | -0.380540000 | 1.312728000  |
| 6 | -0.760382000 | -1.099316000 | -0.128055000 |
| 6 | 1.261852000  | -0.416528000 | -0.147668000 |
| 8 | 0.494313000  | -1.510826000 | -0.659672000 |
| 6 | -1.848357000 | -2.098305000 | -0.426108000 |
| 8 | -2.747499000 | -2.328989000 | -0.337482000 |
| 1 | -1.764595000 | -2.592059000 | -1.415227000 |
| 6 | 2.733153000  | -0.522714000 | -0.440871000 |
| 8 | 3.276117000  | -1.518875000 | 0.392288000  |
| 1 | -1.152828000 | -0.863703000 | 2.131793000  |
| 1 | 1.436010000  | -0.007004000 | 2.126276000  |
| 1 | 2.857381000  | -0.758048000 | -1.508410000 |
| 1 | 3.174641000  | 0.467534000  | -0.249946000 |
| 1 | 4.224590000  | -1.580033000 | 0.218143000  |
| 6 | 0.533685000  | 0.768130000  | -0.883459000 |
| 6 | -0.921955000 | 0.282838000  | -0.885074000 |
| 6 | 0.526007000  | 2.072115000  | -0.107649000 |
| 6 | -1.705170000 | 1.342651000  | -0.128271000 |
| 7 | -0.791426000 | 2.325741000  | 0.250286000  |
| 8 | 1.477666000  | 2.755993000  | 0.177494000  |
| 8 | -2.881816000 | 1.352664000  | 0.120672000  |
| 1 | 0.961957000  | 0.913925000  | -1.878440000 |
| 1 | -1.347473000 | 0.126545000  | -1.879322000 |
| 1 | -1.056354000 | 3.117130000  | 0.825286000  |

### HMF R exo

SCF energy = -817.271629120 Hartree

Free energy correction= 0.143815727 Hartree

|   |              |              |              |
|---|--------------|--------------|--------------|
| 6 | -1.019611000 | -1.936954000 | 0.914248000  |
| 6 | 0.385647000  | -2.087718000 | 0.778980000  |
| 6 | -1.429367000 | -1.182467000 | -0.149705000 |
| 6 | 0.732452000  | -1.423588000 | -0.367375000 |
| 8 | -0.357707000 | -0.871168000 | -0.938737000 |
| 6 | -2.739208000 | -0.659899000 | -0.540101000 |
| 8 | -3.730109000 | -0.836539000 | 0.133905000  |
| 1 | -2.758279000 | -0.085145000 | -1.484046000 |
| 6 | 2.046943000  | -1.291303000 | -1.081133000 |
| 8 | 3.120956000  | -1.438484000 | -0.192243000 |
| 1 | -1.666788000 | -2.318339000 | 1.691015000  |
| 1 | 1.072034000  | -2.625679000 | 1.415845000  |
| 1 | 2.133769000  | -2.089582000 | -1.826712000 |
| 1 | 2.069324000  | -0.335464000 | -1.623515000 |
| 1 | 3.224279000  | -0.589134000 | 0.269395000  |
| 6 | -0.734620000 | 1.429856000  | 1.183729000  |
| 6 | 0.512790000  | 1.121108000  | 1.539480000  |
| 6 | -0.707822000 | 2.021568000  | -0.199230000 |
| 6 | 1.439422000  | 1.493341000  | 0.420451000  |
| 7 | 0.644761000  | 2.072187000  | -0.552837000 |
| 8 | -1.632485000 | 2.370307000  | -0.885058000 |
| 8 | 2.636639000  | 1.315125000  | 0.346973000  |
| 1 | -1.661999000 | 1.295121000  | 1.725166000  |
| 1 | 0.876878000  | 0.663551000  | 2.449515000  |
| 1 | 0.979340000  | 2.361770000  | -1.461593000 |

### HMF TS exo

SCF energy = -817.240251646 Hartree

**Free energy correction=** 0.147446819 Hartree

**Imaginary Frequency=** -507.6318  $\text{icm}^{-1}$

|   |              |              |              |
|---|--------------|--------------|--------------|
| 6 | -0.966722000 | -2.014179000 | 0.698288000  |
| 6 | 0.389204000  | -2.163501000 | 0.633906000  |
| 6 | -1.277894000 | -0.933790000 | -0.178827000 |
| 6 | 0.855931000  | -1.187784000 | -0.298716000 |
| 8 | -0.207554000 | -0.733412000 | -1.009945000 |
| 6 | -2.625505000 | -0.572394000 | -0.683680000 |
| 8 | -3.618461000 | -0.894983000 | -0.079590000 |
| 1 | -2.652094000 | 0.015816000  | -1.617610000 |
| 6 | 2.215623000  | -1.123617000 | -0.948251000 |
| 8 | 3.219793000  | -1.046315000 | 0.027461000  |
| 1 | -1.685748000 | -2.497067000 | 1.345082000  |
| 1 | 1.038104000  | -2.795152000 | 1.224979000  |
| 1 | 2.377182000  | -2.042176000 | -1.522833000 |
| 1 | 2.236007000  | -0.280113000 | -1.649392000 |
| 1 | 3.305191000  | -0.100840000 | 0.252794000  |
| 6 | -0.689166000 | 0.641333000  | 1.070692000  |
| 6 | 0.702578000  | 0.441606000  | 1.097037000  |
| 6 | -0.956370000 | 1.808091000  | 0.160330000  |
| 6 | 1.329690000  | 1.489781000  | 0.248252000  |
| 7 | 0.293170000  | 2.218737000  | -0.310342000 |
| 8 | -2.012927000 | 2.299038000  | -0.150354000 |
| 8 | 2.512571000  | 1.676902000  | 0.029672000  |
| 1 | -1.376441000 | 0.466302000  | 1.888290000  |
| 1 | 1.271403000  | 0.034425000  | 1.921571000  |
| 1 | 0.422619000  | 2.944535000  | -1.002631000 |

### HMF P exo

**SCF energy =** -817.284816801 Hartree

**Free energy correction=** 0.150777556 Hartree

|   |              |              |              |
|---|--------------|--------------|--------------|
| 6 | 0.998653000  | -2.010977000 | -0.682136000 |
| 6 | -0.317957000 | -2.191175000 | -0.614132000 |
| 6 | 1.257699000  | -0.713372000 | 0.065728000  |
| 6 | -0.858590000 | -1.004458000 | 0.170670000  |
| 8 | 0.227174000  | -0.696727000 | 1.048795000  |
| 6 | 2.633370000  | -0.517985000 | 0.660850000  |
| 8 | 3.619252000  | -0.908562000 | 0.091837000  |
| 1 | 2.668226000  | 0.001839000  | 1.635401000  |
| 6 | -2.178318000 | -1.153006000 | 0.905485000  |
| 8 | -3.246818000 | -1.103393000 | -0.008530000 |
| 1 | 1.764301000  | -2.576257000 | -1.197322000 |
| 1 | -0.939640000 | -2.949370000 | -1.074361000 |
| 1 | -2.206095000 | -2.124366000 | 1.407109000  |
| 1 | -2.246749000 | -0.371597000 | 1.673411000  |
| 1 | -3.415969000 | -0.160348000 | -0.180091000 |
| 6 | 0.752894000  | 0.449646000  | -0.867589000 |
| 6 | -0.767323000 | 0.207911000  | -0.837599000 |
| 6 | 0.945230000  | 1.794728000  | -0.176539000 |
| 6 | -1.359093000 | 1.466980000  | -0.232665000 |
| 7 | -0.318482000 | 2.312809000  | 0.093127000  |
| 8 | 1.987855000  | 2.316851000  | 0.121867000  |
| 8 | -2.533141000 | 1.692344000  | -0.031787000 |
| 1 | 1.233706000  | 0.447588000  | -1.846684000 |
| 1 | -1.247145000 | -0.016124000 | -1.790520000 |
| 1 | -0.455219000 | 3.185119000  | 0.591268000  |

### Ketone R endo

**SCF energy =** -742.052661389 Hartree

**Free energy correction=** 0.135564105 Hartree

|   |              |              |             |
|---|--------------|--------------|-------------|
| 6 | -0.835826000 | 0.240501000  | 1.580238000 |
| 6 | 0.133995000  | -0.762061000 | 1.868246000 |

|   |              |              |              |
|---|--------------|--------------|--------------|
| 6 | -1.591504000 | -0.249209000 | 0.552590000  |
| 6 | -0.103764000 | -1.779550000 | 0.991898000  |
| 8 | -1.151680000 | -1.485530000 | 0.194773000  |
| 6 | -2.710686000 | 0.336848000  | -0.207125000 |
| 8 | -3.103549000 | 1.453990000  | 0.058268000  |
| 1 | 0.371097000  | -2.734115000 | 0.820423000  |
| 1 | -0.962696000 | 1.207584000  | 2.045145000  |
| 6 | 1.158370000  | -0.301296000 | -1.466275000 |
| 6 | 0.752103000  | 0.933456000  | -1.172625000 |
| 6 | 2.359901000  | -0.632290000 | -0.625572000 |
| 6 | 1.662553000  | 1.504930000  | -0.117712000 |
| 7 | 2.623413000  | 0.520373000  | 0.109383000  |
| 8 | 2.973214000  | -1.668727000 | -0.574664000 |
| 8 | 1.594686000  | 2.574224000  | 0.430757000  |
| 1 | 0.743054000  | -1.015556000 | -2.165353000 |
| 1 | -0.079342000 | 1.502872000  | -1.568288000 |
| 1 | 3.343615000  | 0.588678000  | 0.814310000  |
| 1 | 0.909083000  | -0.734348000 | 2.619744000  |
| 6 | -3.302877000 | -0.506518000 | -1.312500000 |
| 1 | -3.664619000 | -1.459657000 | -0.915079000 |
| 1 | -4.121192000 | 0.043475000  | -1.776671000 |
| 1 | -2.537838000 | -0.742070000 | -2.059960000 |

### Ketone TS endo

**SCF energy =** -742.024317008 Hartree

**Free energy correction=** 0.140526007 Hartree

**Imaginary Frequency=** -535.7655  $\text{icm}^{-1}$

|   |              |              |              |
|---|--------------|--------------|--------------|
| 6 | -0.381560000 | -0.398986000 | 1.538153000  |
| 6 | 0.587138000  | -1.359242000 | 1.412416000  |
| 6 | -1.150213000 | -0.467145000 | 0.346235000  |
| 6 | 0.381906000  | -1.950985000 | 0.132316000  |
| 8 | -0.883660000 | -1.649275000 | -0.280248000 |
| 6 | -2.459752000 | 0.193395000  | 0.085511000  |
| 8 | -2.790288000 | 1.134320000  | 0.769646000  |
| 1 | 0.776808000  | -2.891168000 | -0.229678000 |
| 1 | -0.510918000 | 0.355570000  | 2.301592000  |
| 6 | 1.190650000  | -0.510578000 | -1.094759000 |
| 6 | 0.227633000  | 0.507589000  | -1.010355000 |
| 6 | 2.412101000  | -0.043715000 | -0.358468000 |
| 6 | 0.801639000  | 1.629581000  | -0.208909000 |
| 7 | 2.061649000  | 1.179711000  | 0.205250000  |
| 8 | 3.473961000  | -0.603724000 | -0.231242000 |
| 8 | 0.317787000  | 2.700476000  | 0.058249000  |
| 1 | 1.318654000  | -1.166196000 | -1.947571000 |
| 1 | -0.520874000 | 0.727953000  | -1.761392000 |
| 1 | 2.686344000  | 1.729324000  | 0.779712000  |
| 1 | 1.436844000  | -1.546261000 | 2.054266000  |
| 6 | -3.290951000 | -0.364288000 | -1.043179000 |
| 1 | -3.568187000 | -1.399887000 | -0.821002000 |
| 1 | -4.185759000 | 0.246336000  | -1.161698000 |
| 1 | -2.718412000 | -0.381785000 | -1.975985000 |

### Ketone P endo

**SCF energy =** -742.066290631 Hartree

**Free energy correction=** 0.145233533 Hartree

|   |              |              |              |
|---|--------------|--------------|--------------|
| 6 | -0.357030000 | -0.391464000 | 1.540213000  |
| 6 | 0.585883000  | -1.328401000 | 1.450896000  |
| 6 | -0.989941000 | -0.329832000 | 0.161956000  |
| 6 | 0.530108000  | -1.819710000 | 0.011679000  |
| 8 | -0.852789000 | -1.669413000 | -0.307611000 |
| 6 | -2.409541000 | 0.193236000  | 0.065417000  |
| 8 | -2.780003000 | 1.048383000  | 0.833050000  |







|   |              |              |              |   |             |              |             |
|---|--------------|--------------|--------------|---|-------------|--------------|-------------|
| 6 | -0.323431000 | -1.814317000 | -0.262049000 | 1 | 2.401460000 | -1.691945000 | 2.286538000 |
| 6 | -1.359582000 | -0.982808000 | 0.095925000  | 1 | 3.838199000 | -2.310959000 | 1.396927000 |
| 6 | 0.839592000  | -1.218922000 | 0.267990000  | 1 | 3.416552000 | -0.573943000 | 1.373266000 |
| 6 | -0.766458000 | 0.106933000  | 0.818792000  |   |             |              |             |
| 8 | 0.484783000  | -0.291054000 | 1.190632000  |   |             |              |             |
| 6 | 2.210396000  | -1.801059000 | 0.291137000  |   |             |              |             |
| 8 | 2.460995000  | -2.698704000 | -0.482708000 |   |             |              |             |
| 1 | -1.260447000 | 0.815764000  | 1.466674000  |   |             |              |             |
| 1 | -0.326970000 | -2.672892000 | -0.919067000 |   |             |              |             |
| 6 | 0.957690000  | 0.437516000  | -1.272071000 |   |             |              |             |
| 6 | -0.111489000 | 1.191995000  | -0.768004000 |   |             |              |             |
| 6 | 2.229094000  | 1.061967000  | -0.820360000 |   |             |              |             |
| 6 | 0.481363000  | 2.342095000  | 0.010104000  |   |             |              |             |
| 7 | 1.857276000  | 2.143101000  | -0.014517000 |   |             |              |             |
| 8 | 3.368761000  | 0.728633000  | -1.051468000 |   |             |              |             |
| 8 | -0.094125000 | 3.240460000  | 0.572077000  |   |             |              |             |
| 1 | 0.959665000  | -0.194152000 | -2.149060000 |   |             |              |             |
| 1 | -1.061353000 | 1.355808000  | -1.264578000 |   |             |              |             |
| 1 | 2.518133000  | 2.739534000  | 0.464427000  |   |             |              |             |
| 7 | -2.671782000 | -1.064365000 | -0.346699000 |   |             |              |             |
| 1 | -2.895310000 | -1.826789000 | -0.971160000 |   |             |              |             |
| 6 | -3.684729000 | -0.207532000 | 0.041264000  |   |             |              |             |
| 8 | -3.479510000 | 0.735459000  | 0.775148000  |   |             |              |             |
| 6 | -5.050601000 | -0.559775000 | -0.503551000 |   |             |              |             |
| 1 | -5.534706000 | -1.271824000 | 0.172098000  |   |             |              |             |
| 1 | -5.652836000 | 0.347590000  | -0.536697000 |   |             |              |             |
| 1 | -5.001670000 | -1.006354000 | -1.499930000 |   |             |              |             |
| 6 | 3.196598000  | -1.249364000 | 1.287370000  |   |             |              |             |
| 1 | 3.156794000  | -1.867893000 | 2.191331000  |   |             |              |             |
| 1 | 4.197055000  | -1.308323000 | 0.858007000  |   |             |              |             |
| 1 | 2.965302000  | -0.220363000 | 1.567740000  |   |             |              |             |

## 5AF Ketone P exo

SCF energy = -950.082330551 Hartree

Free energy correction= 0.193300584 Hartree

|   |              |              |              |
|---|--------------|--------------|--------------|
| 6 | -0.329080000 | -1.751279000 | -0.389584000 |
| 6 | -1.344924000 | -0.993683000 | 0.032105000  |
| 6 | 0.916484000  | -0.979697000 | 0.009483000  |
| 6 | -0.708454000 | 0.237915000  | 0.679391000  |
| 8 | 0.505306000  | -0.307939000 | 1.198751000  |
| 6 | 2.174782000  | -1.819403000 | 0.164490000  |
| 8 | 2.419063000  | -2.634819000 | -0.694321000 |
| 1 | -1.270146000 | 0.776140000  | 1.436720000  |
| 1 | -0.318891000 | -2.667691000 | -0.963926000 |
| 6 | 1.024459000  | 0.244642000  | -0.977849000 |
| 6 | -0.161721000 | 1.106883000  | -0.494400000 |
| 6 | 2.265102000  | 1.075648000  | -0.677204000 |
| 6 | 0.468756000  | 2.382885000  | 0.048588000  |
| 7 | 1.843824000  | 2.278579000  | -0.137337000 |
| 8 | 3.415142000  | 0.747058000  | -0.839414000 |
| 8 | -0.090881000 | 3.311774000  | 0.569079000  |
| 1 | 1.018578000  | -0.069349000 | -2.021901000 |
| 1 | -0.933743000 | 1.347675000  | -1.225593000 |
| 1 | 2.491546000  | 2.980568000  | 0.200859000  |
| 7 | -2.712592000 | -1.197319000 | -0.110909000 |
| 1 | -3.010859000 | -2.118529000 | -0.402564000 |
| 6 | -3.653838000 | -0.188964000 | -0.041882000 |
| 8 | -3.342023000 | 0.968967000  | 0.145842000  |
| 6 | -5.083993000 | -0.657292000 | -0.193685000 |
| 1 | -5.402770000 | -1.174086000 | 0.716879000  |
| 1 | -5.718031000 | 0.214376000  | -0.348719000 |
| 1 | -5.195878000 | -1.347423000 | -1.034912000 |
| 6 | 3.017847000  | -1.593317000 | 1.387989000  |

Copies of NMR spectra:

$^1\text{H}$  and  $^{13}\text{C}$  NMR of product 1a

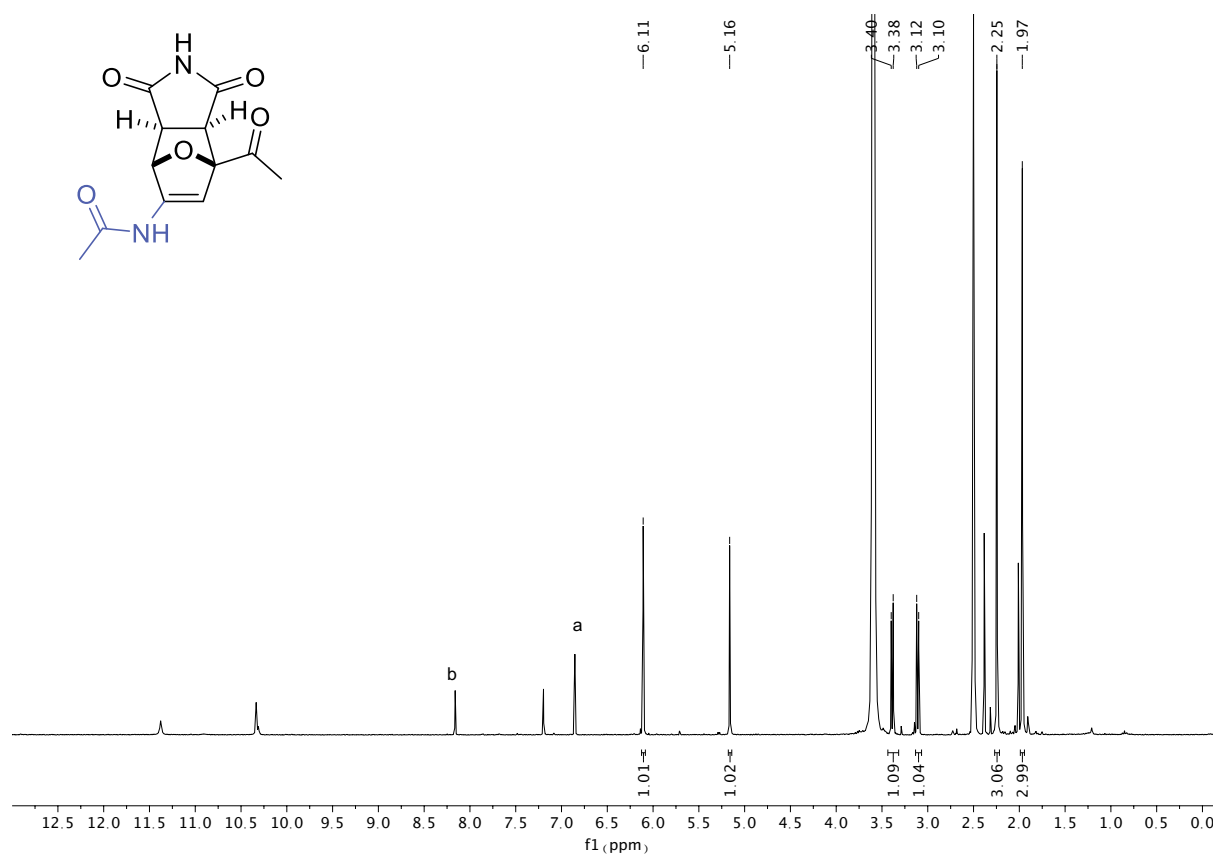

[a] corresponds to maleimide whereas [b] corresponds to 3A5AF.

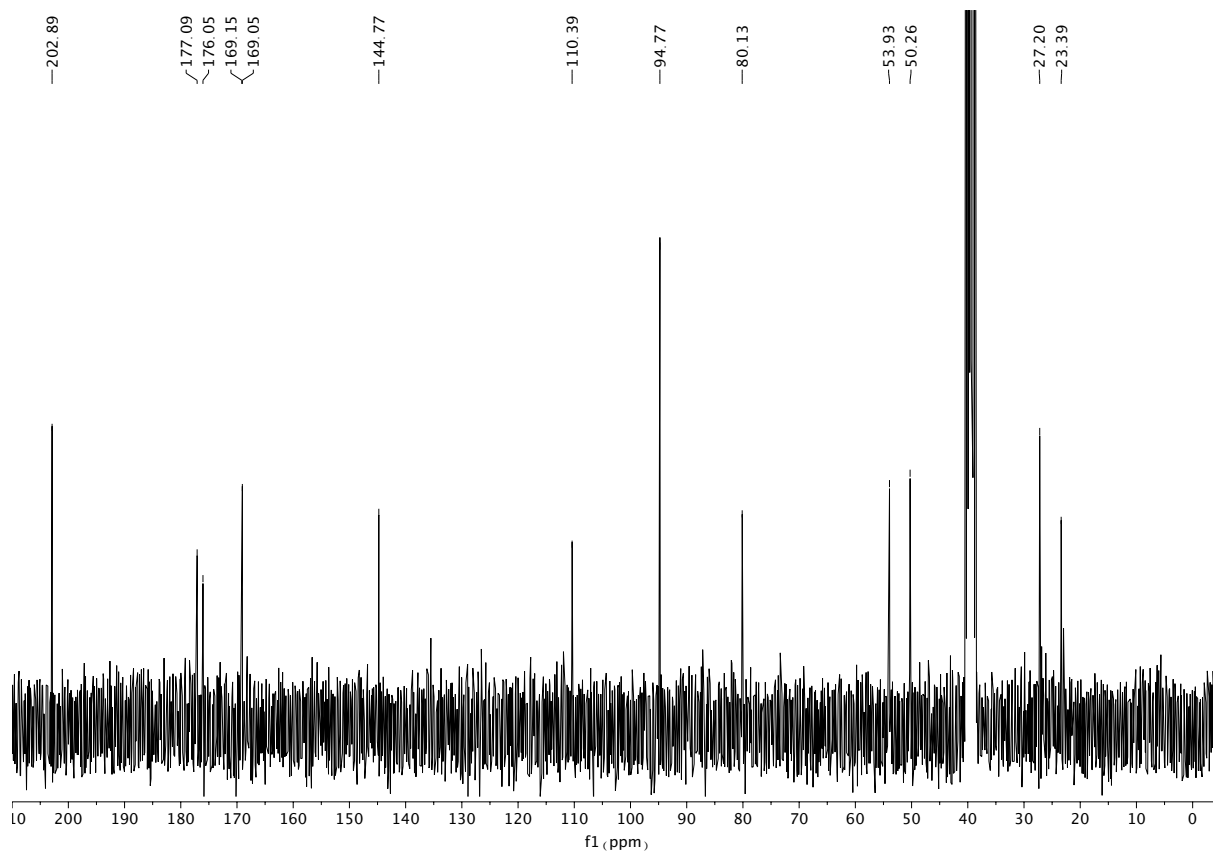

# <sup>1</sup>H and <sup>13</sup>C NMR of product 1b

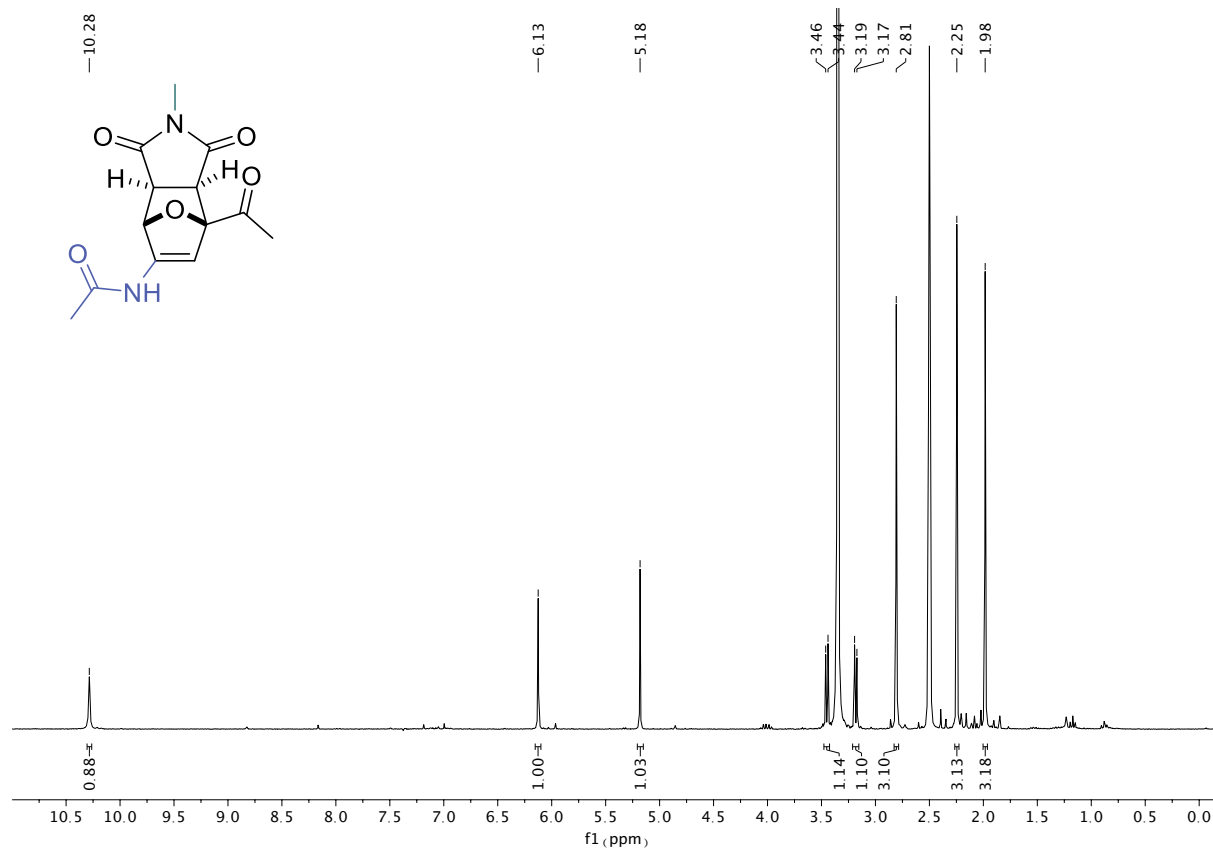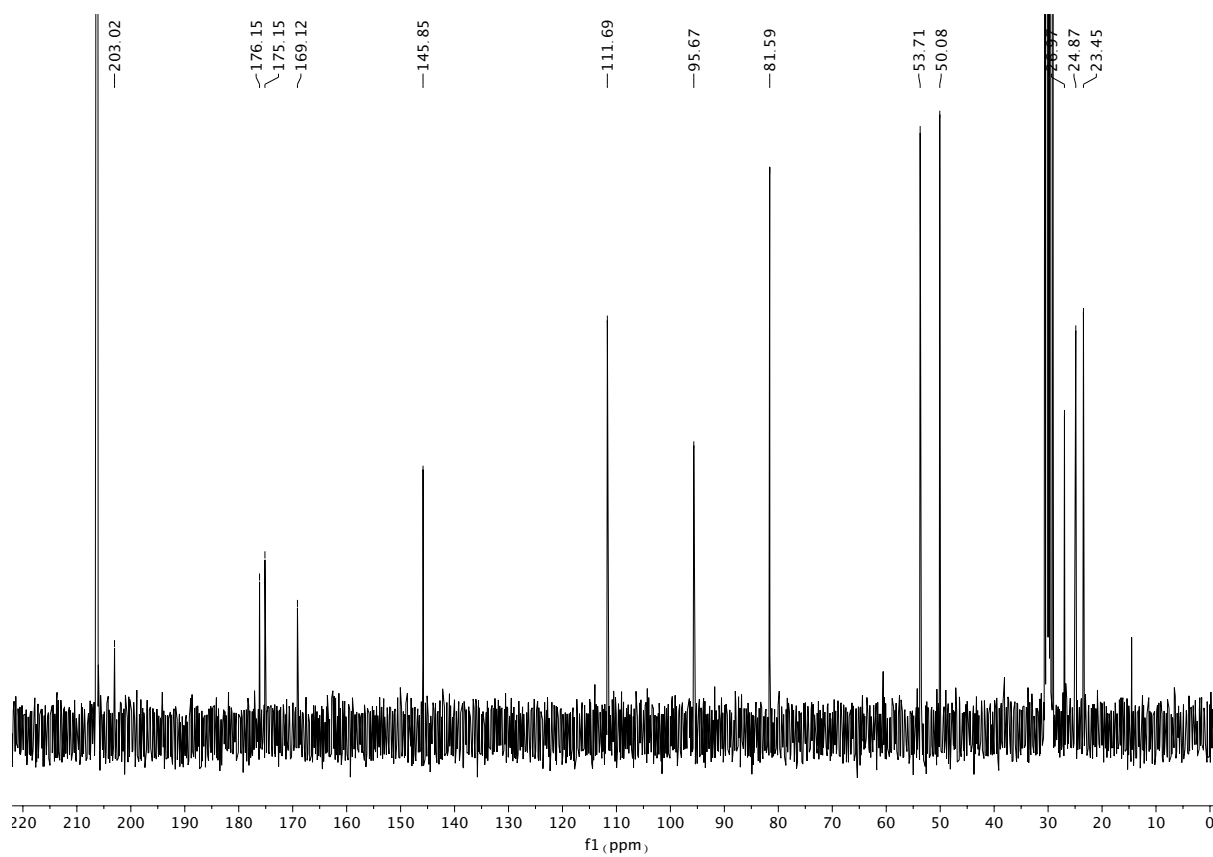

# <sup>1</sup>H and <sup>13</sup>C NMR of product 1c

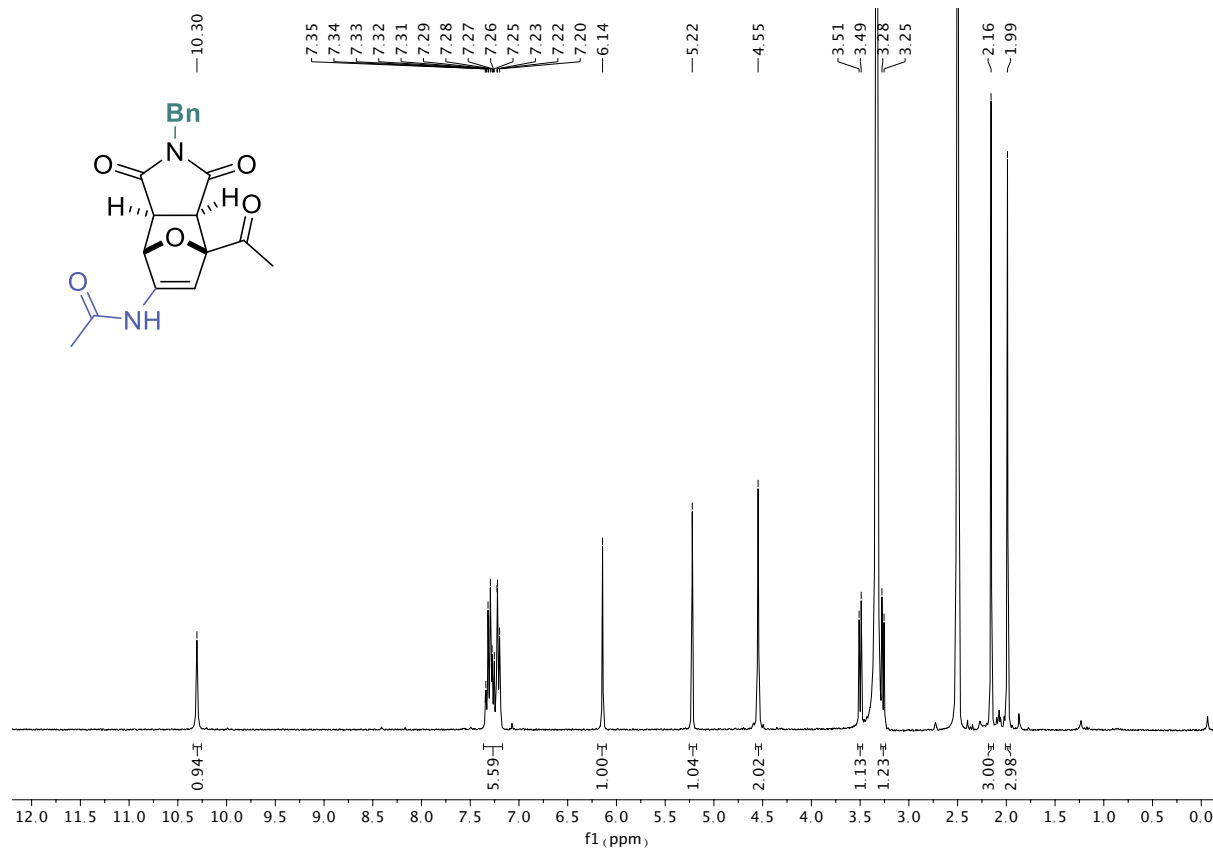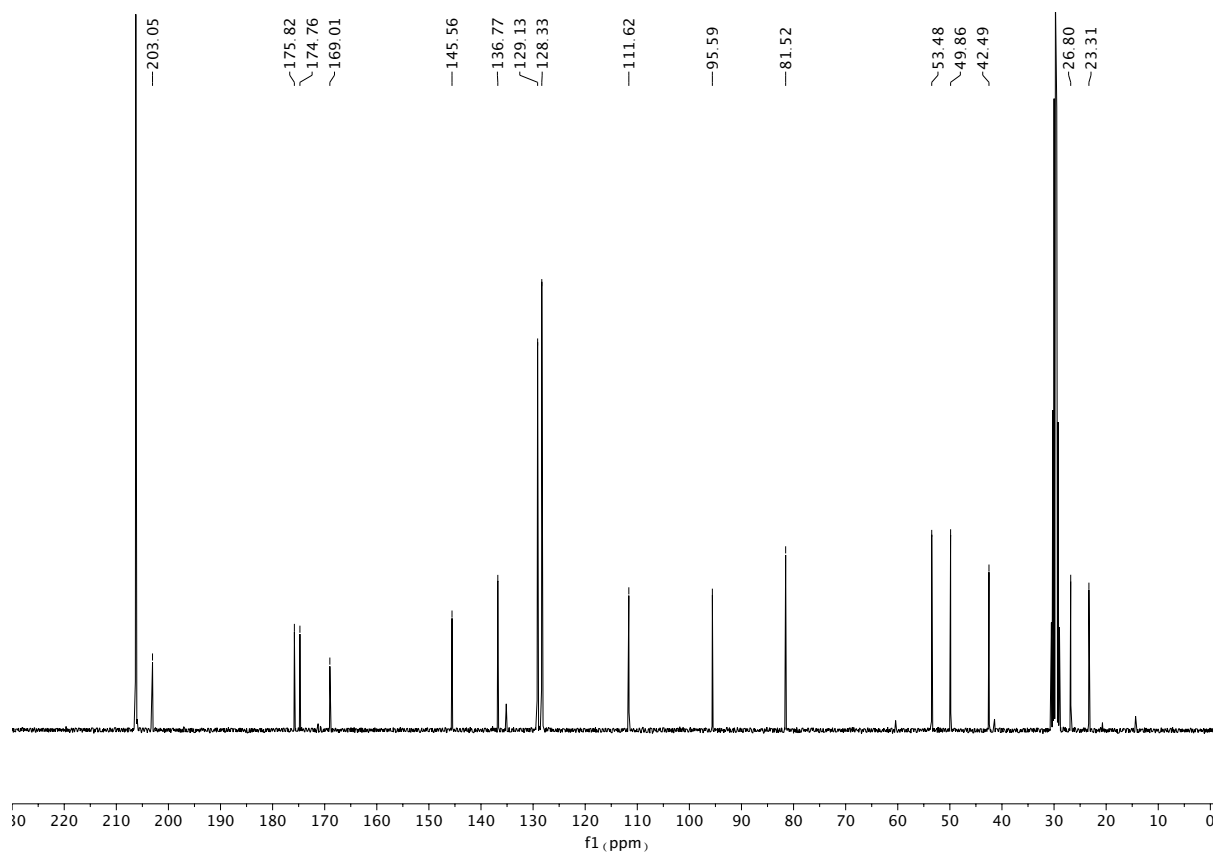

# <sup>1</sup>H and <sup>13</sup>C NMR of product 1d

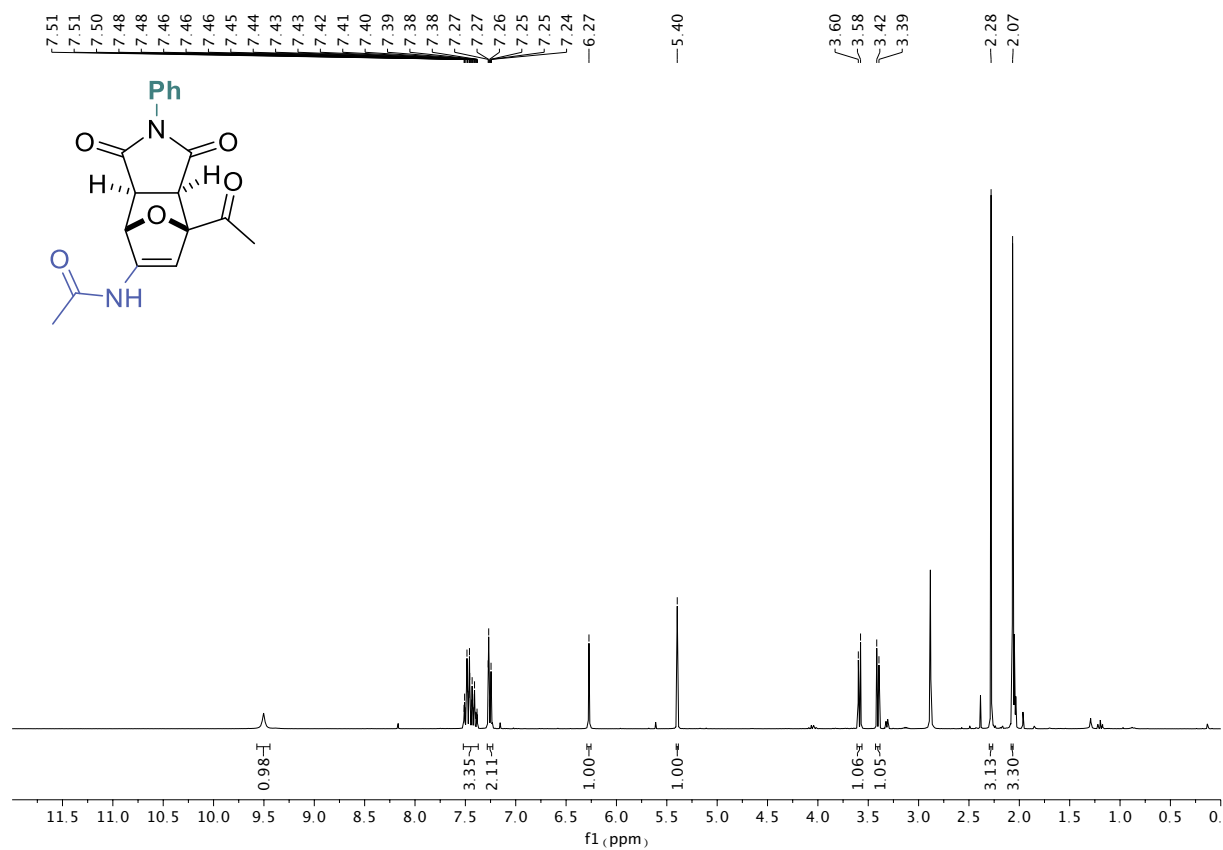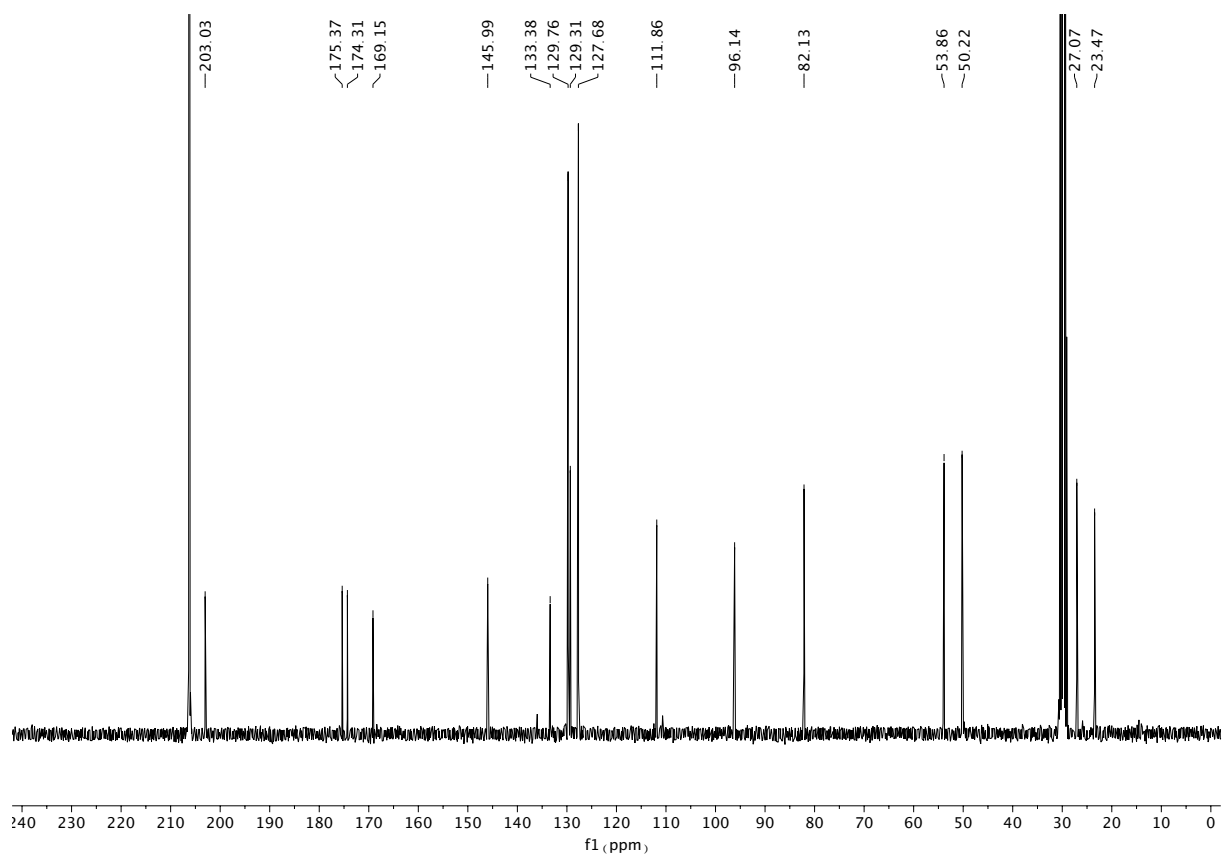

**<sup>1</sup>H and <sup>13</sup>C NMR of product 1e**

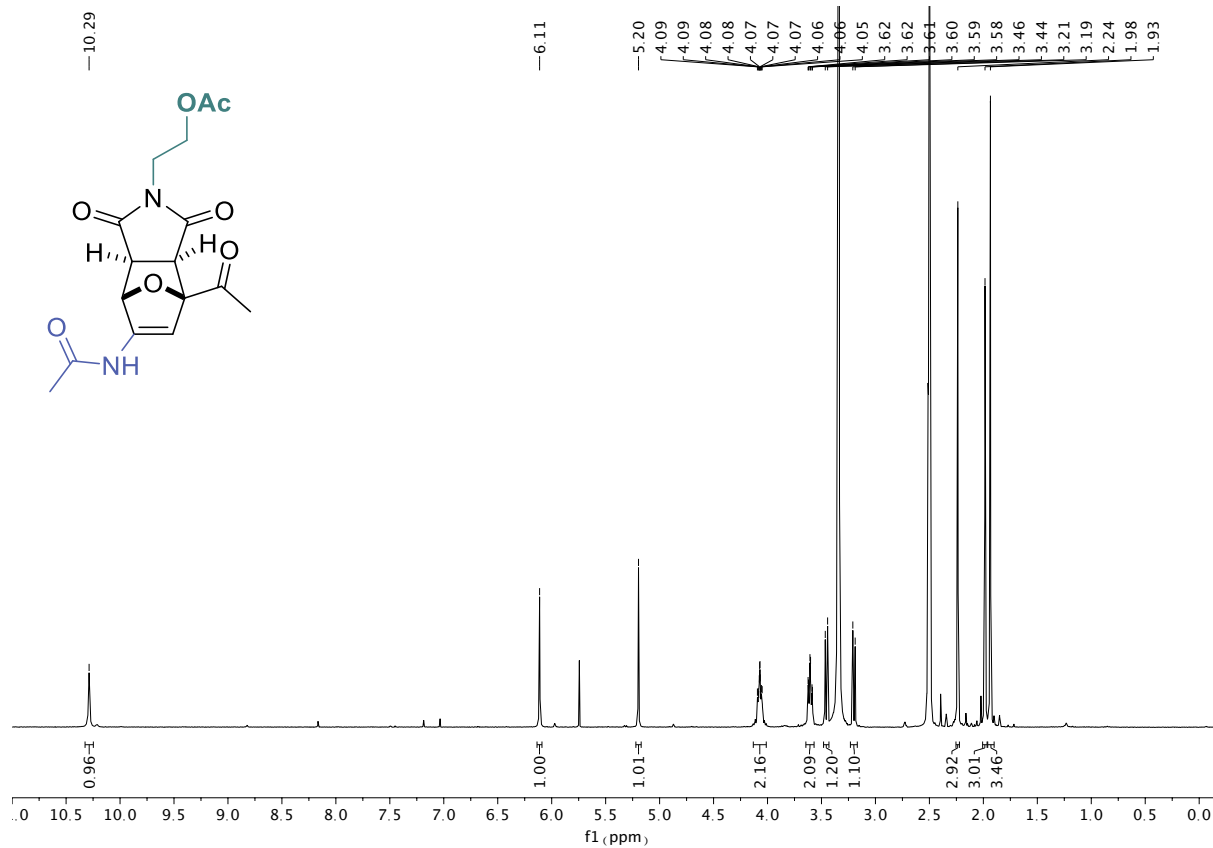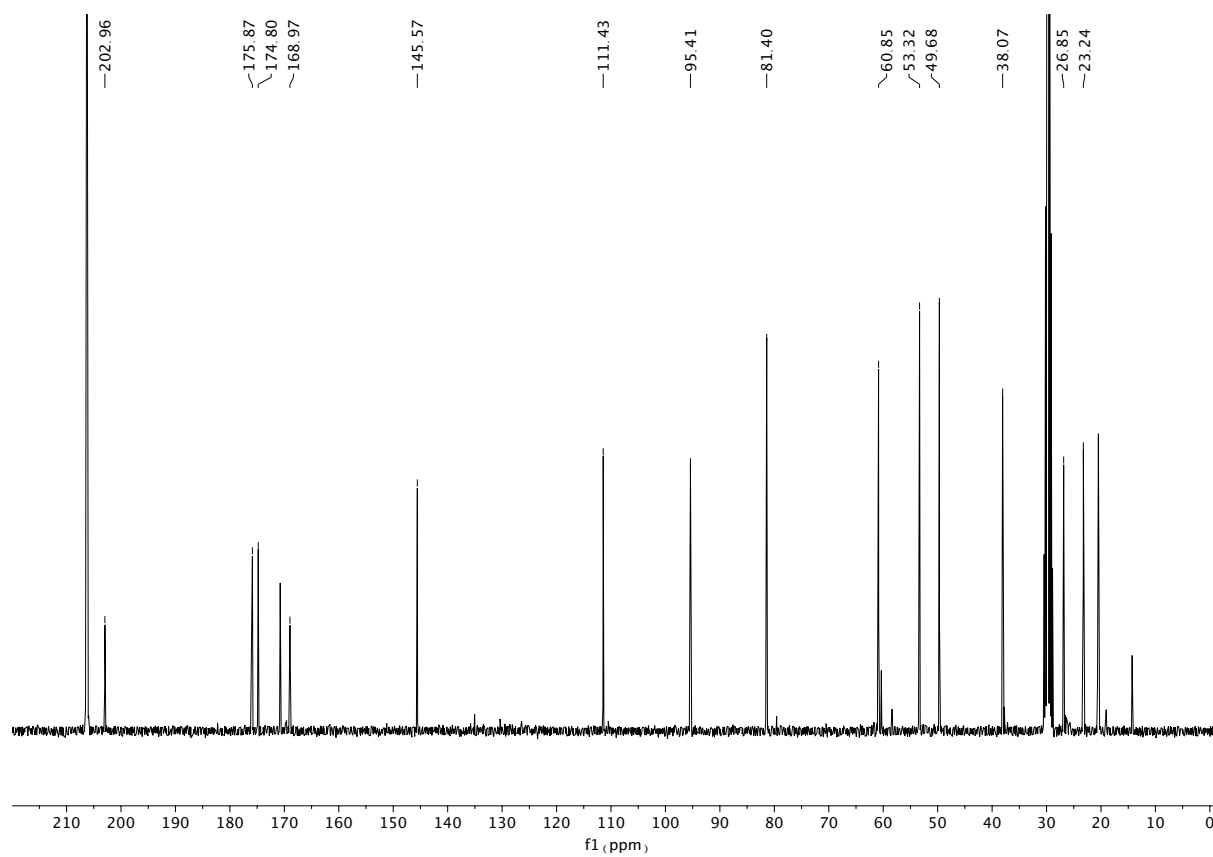

# <sup>1</sup>H and <sup>13</sup>C NMR of product 1f

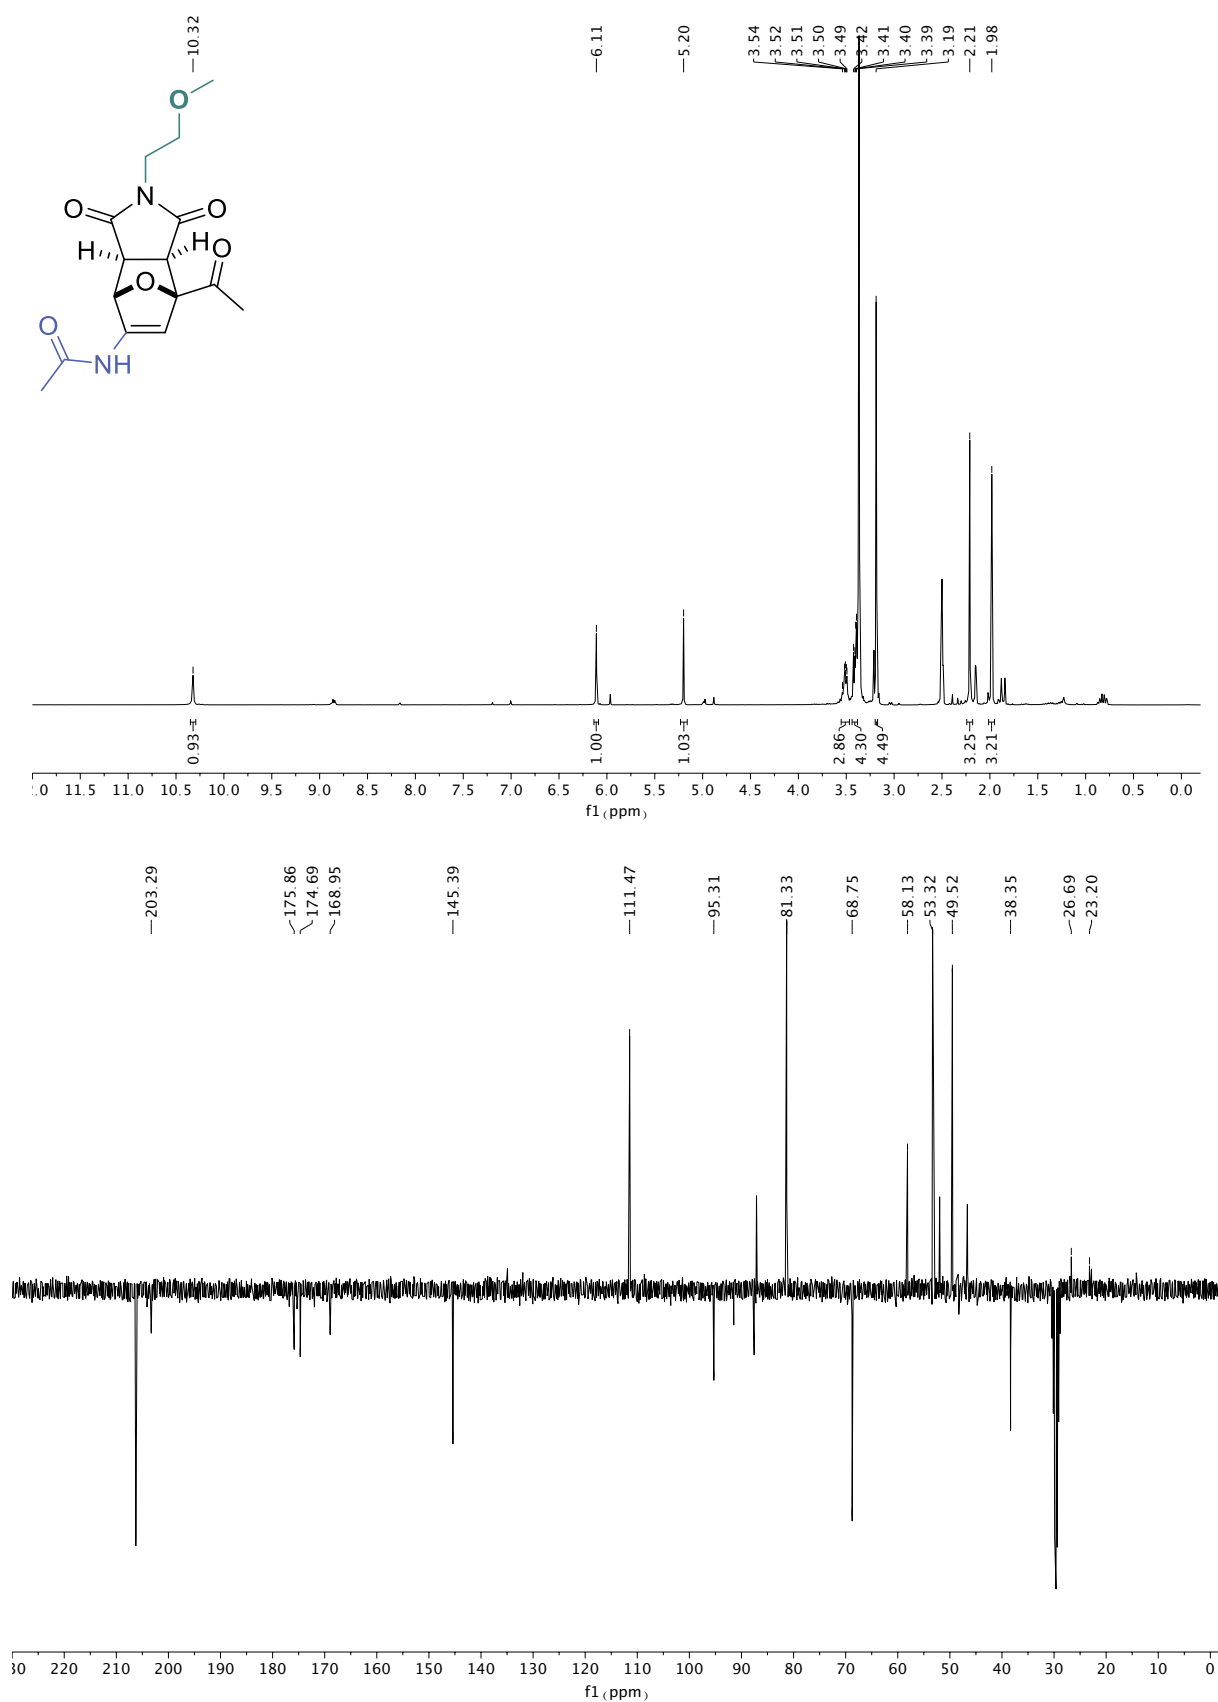

Note: Peaks from the corresponding hemi-acylaminal **2f** are present on the <sup>13</sup>C due to partial hydrolysis on the NMR tube.



**<sup>1</sup>H and <sup>13</sup>C NMR of product 1g**

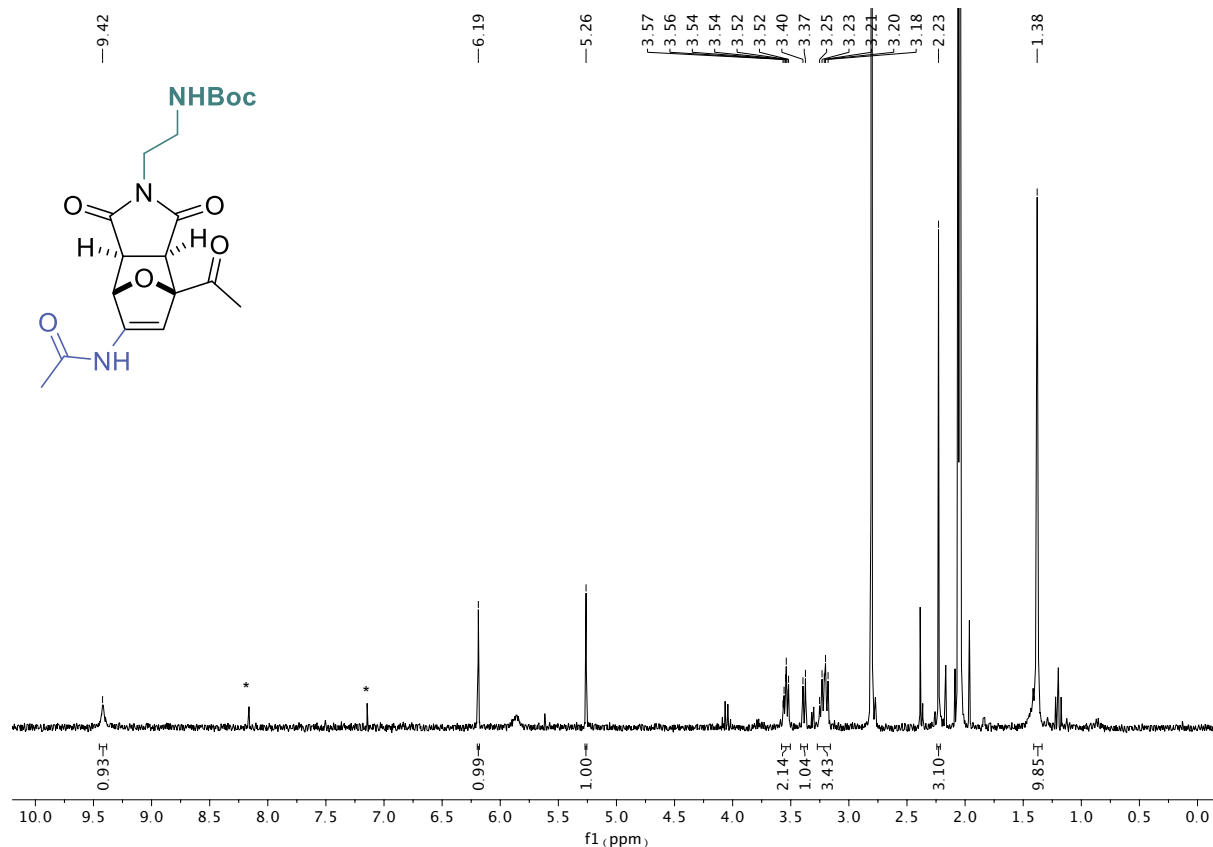

[a] Corresponds to 3A5AF.

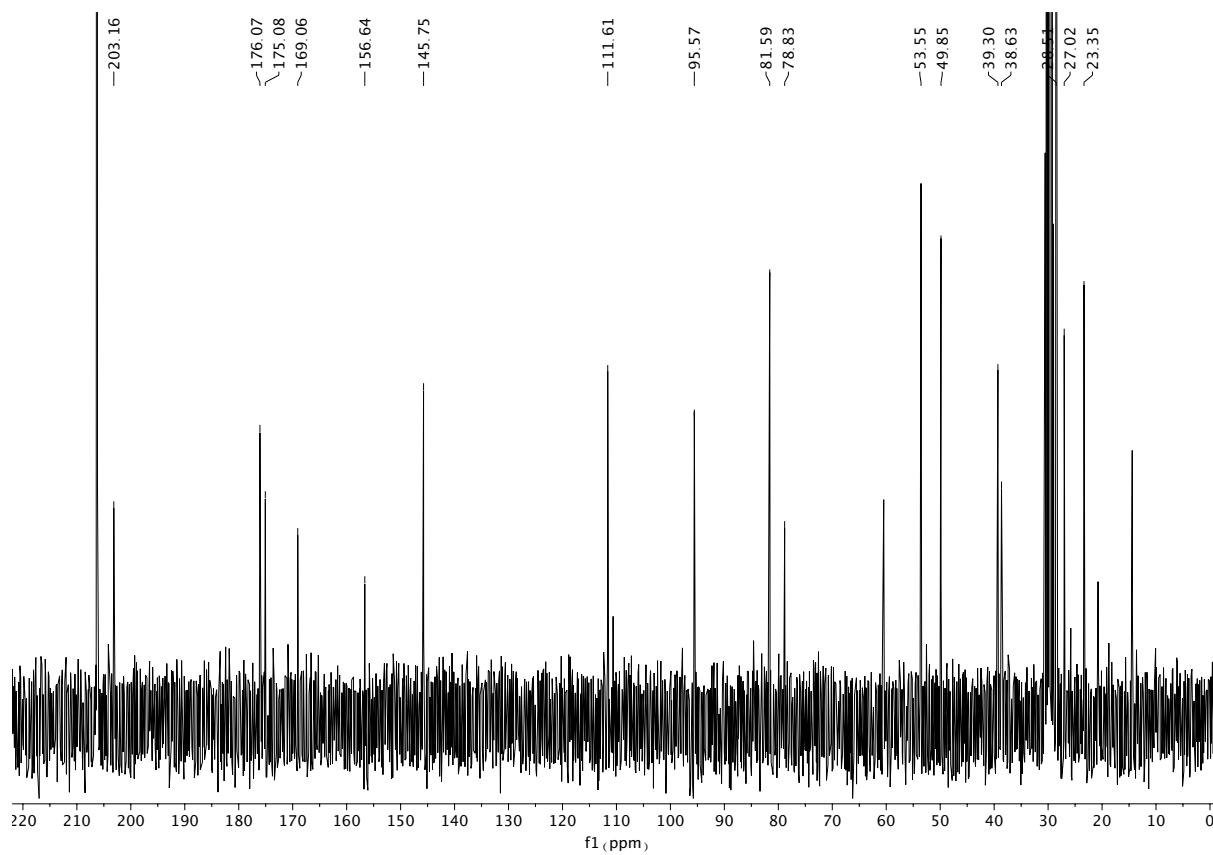

**<sup>1</sup>H and <sup>13</sup>C NMR of product 2a**

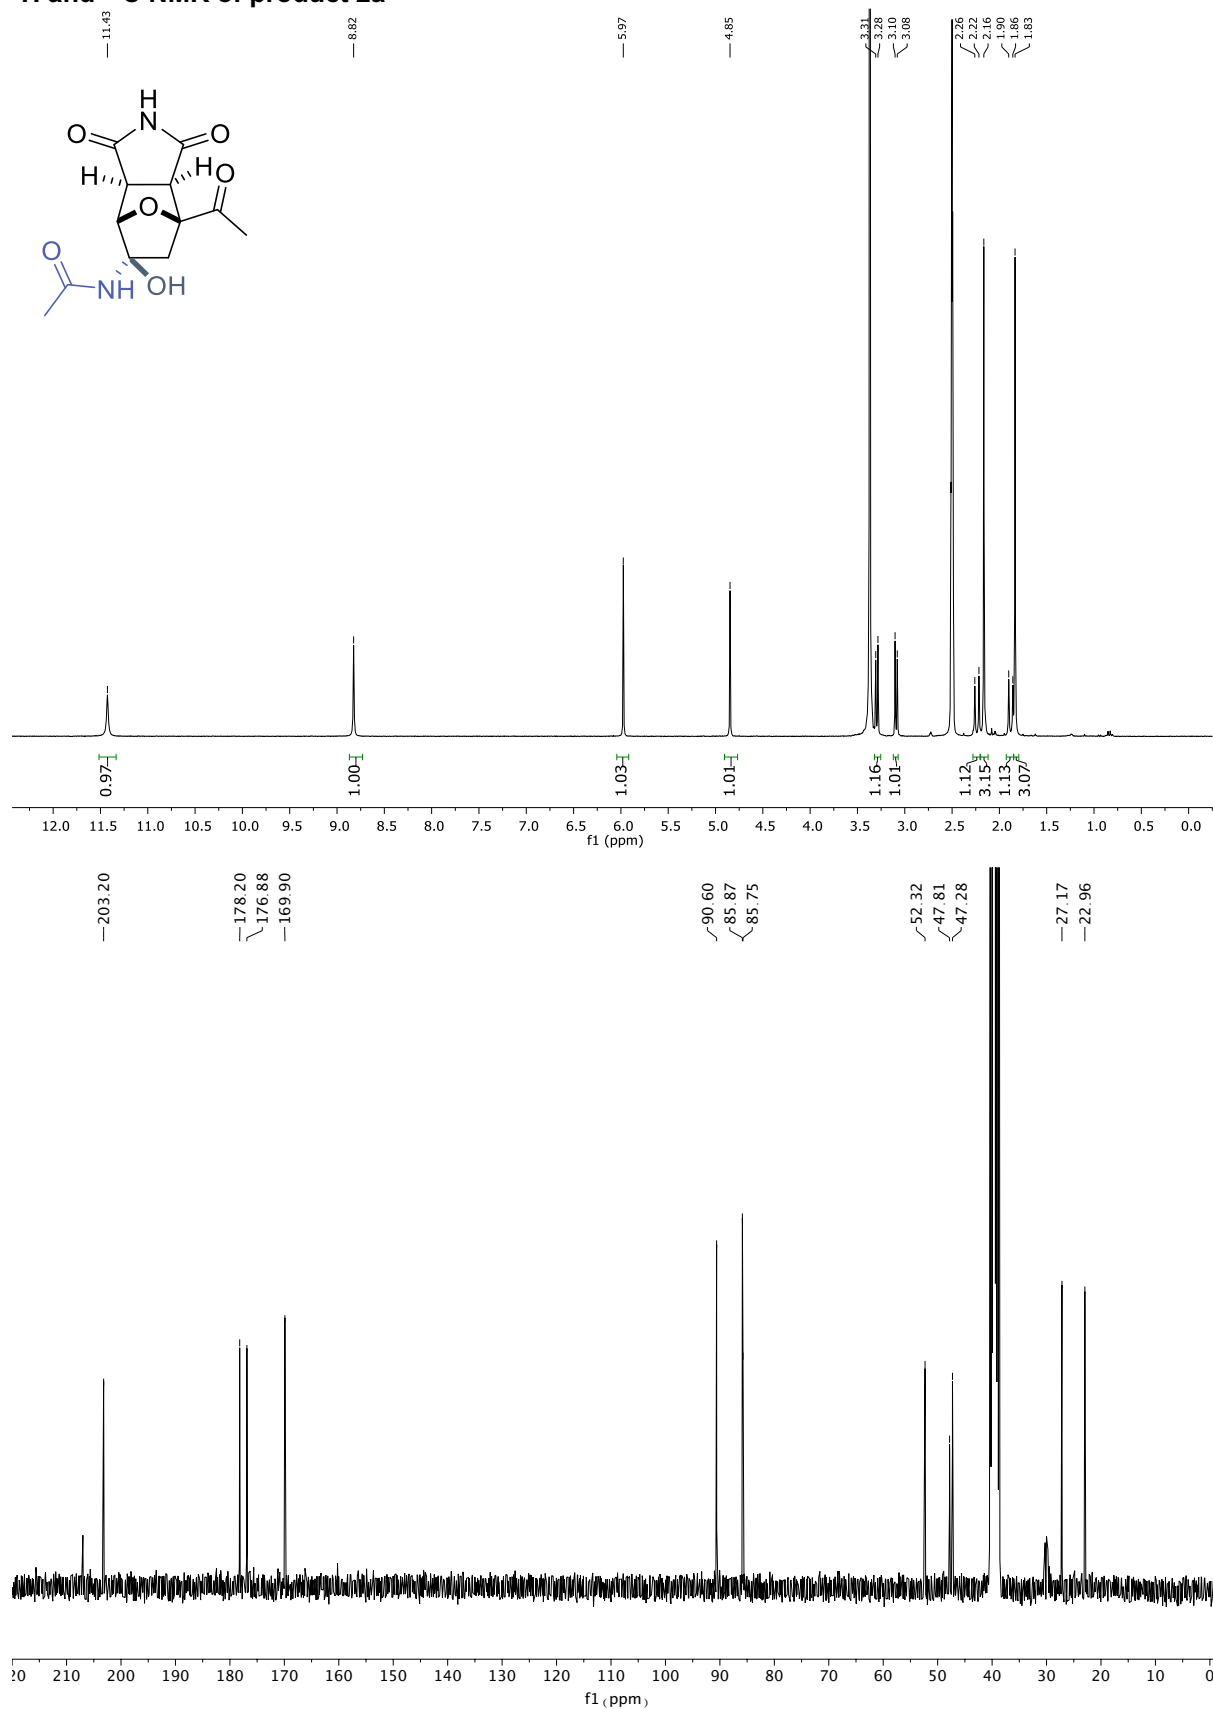

# <sup>1</sup>H and <sup>13</sup>C NMR of product 2b

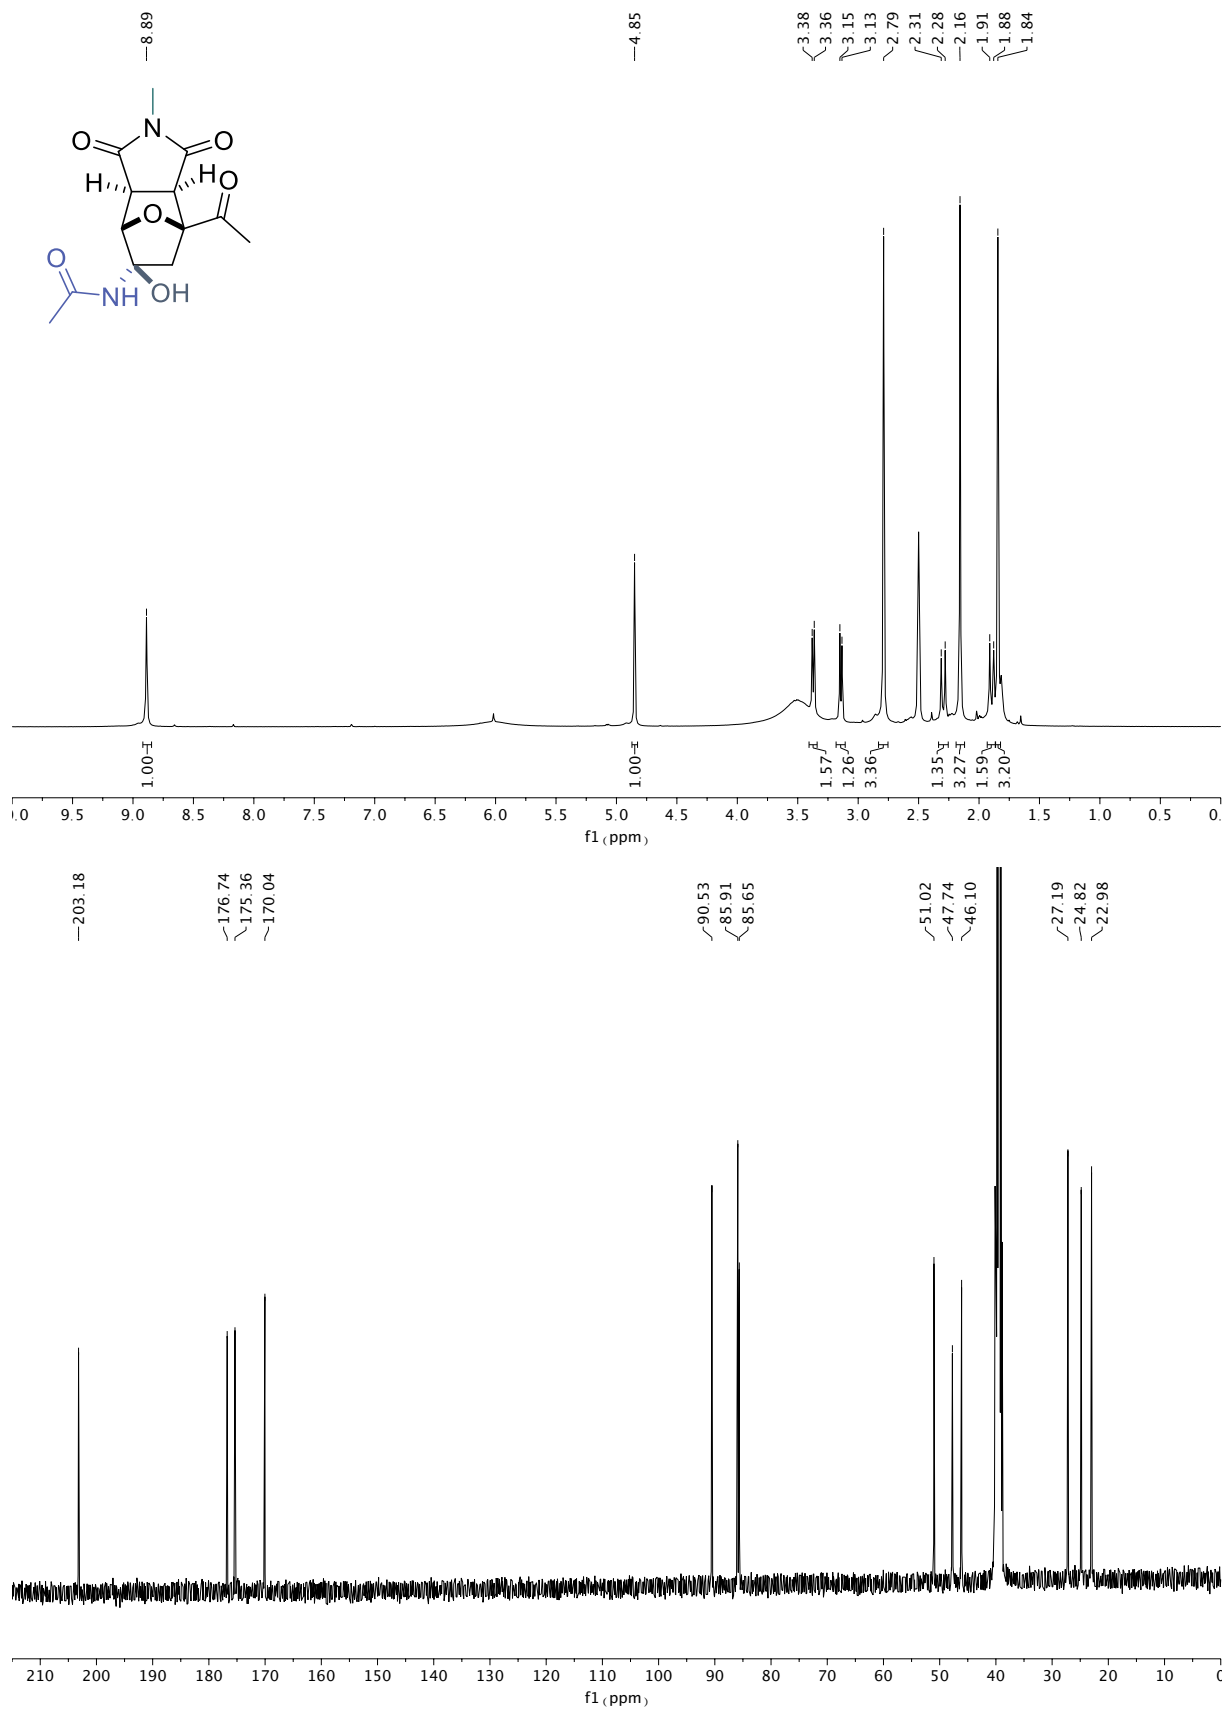

# HSQC and HMBC of product 2b

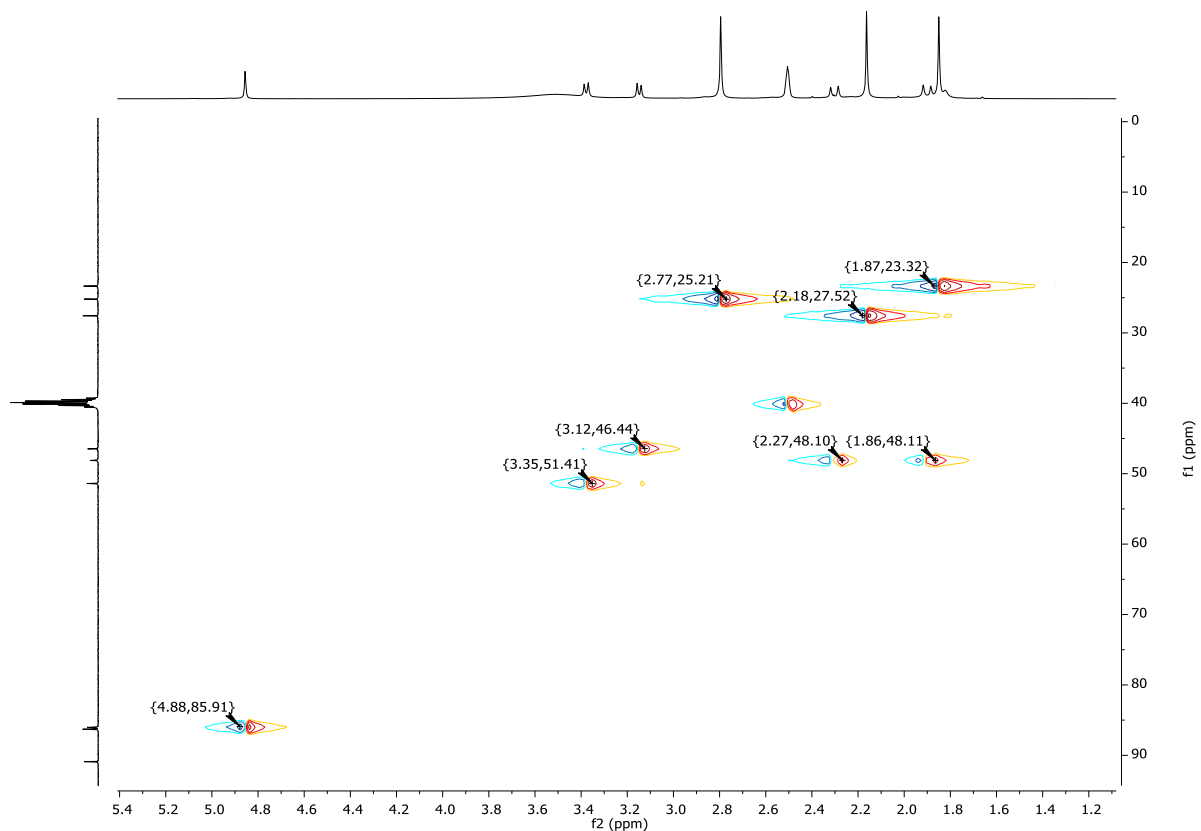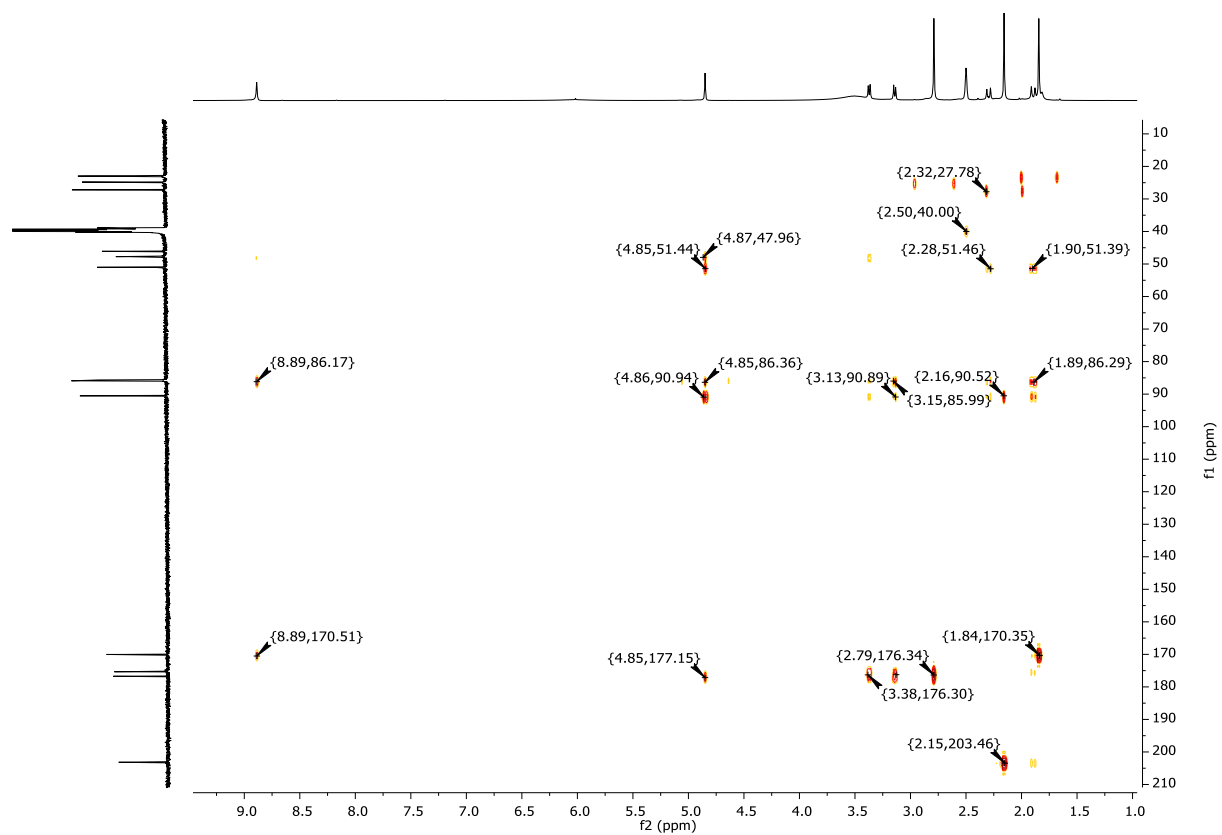

# COSY of product 2b

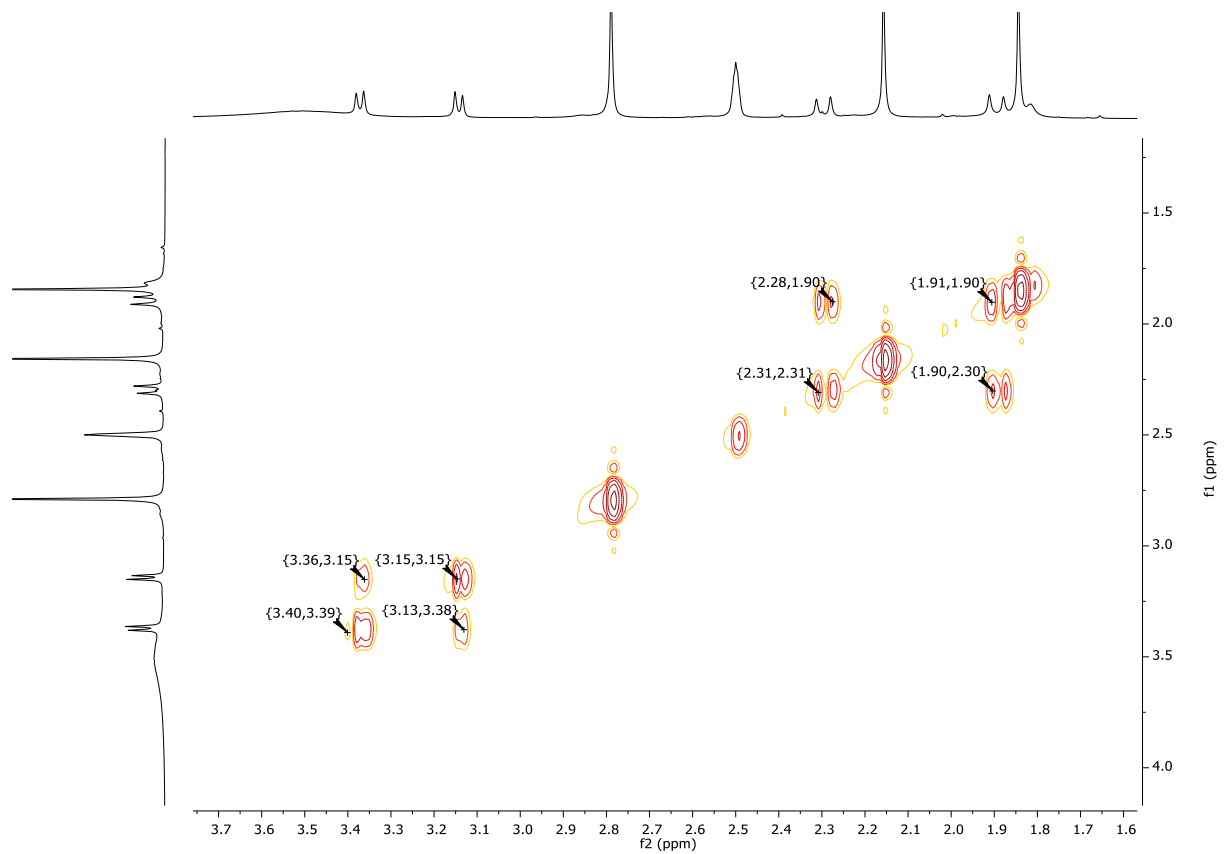

# <sup>1</sup>H and <sup>13</sup>C NMR of product 2c

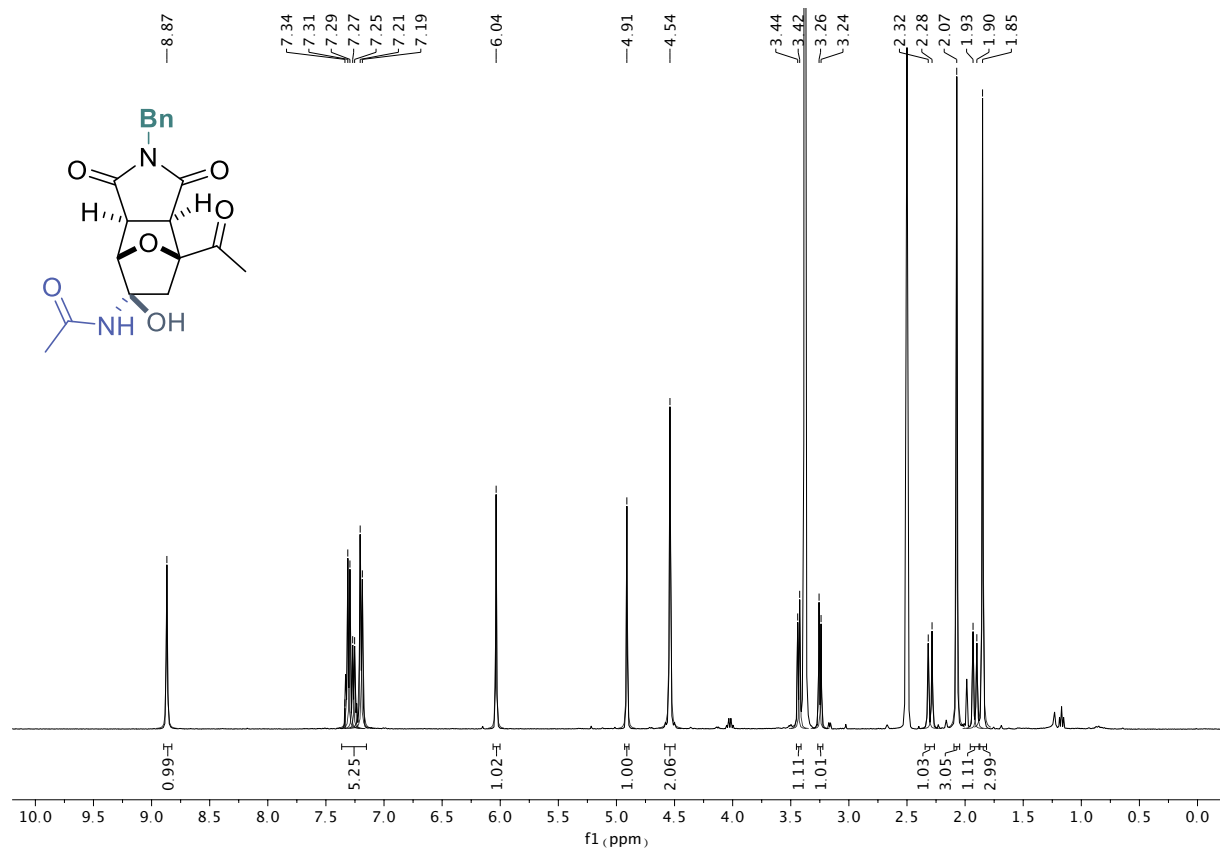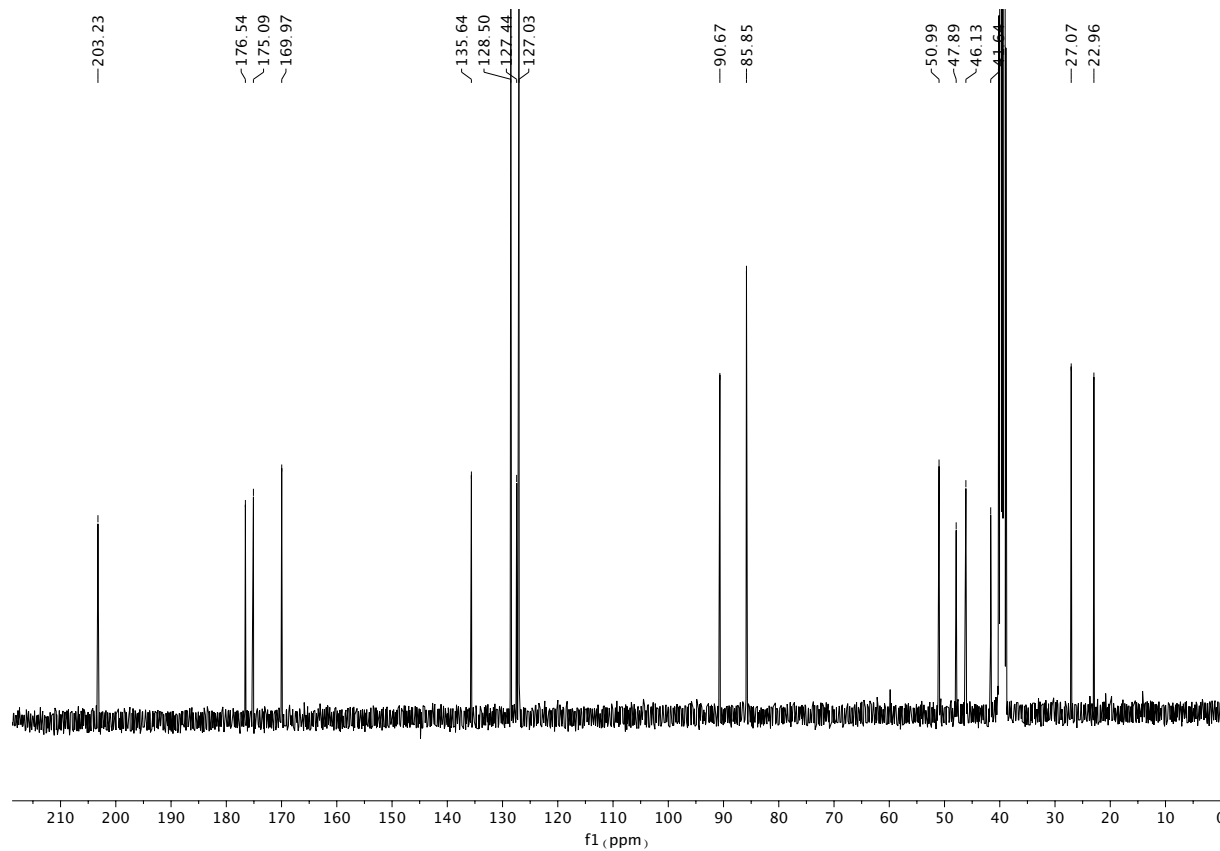

# <sup>1</sup>H and <sup>13</sup>C NMR of product 2d

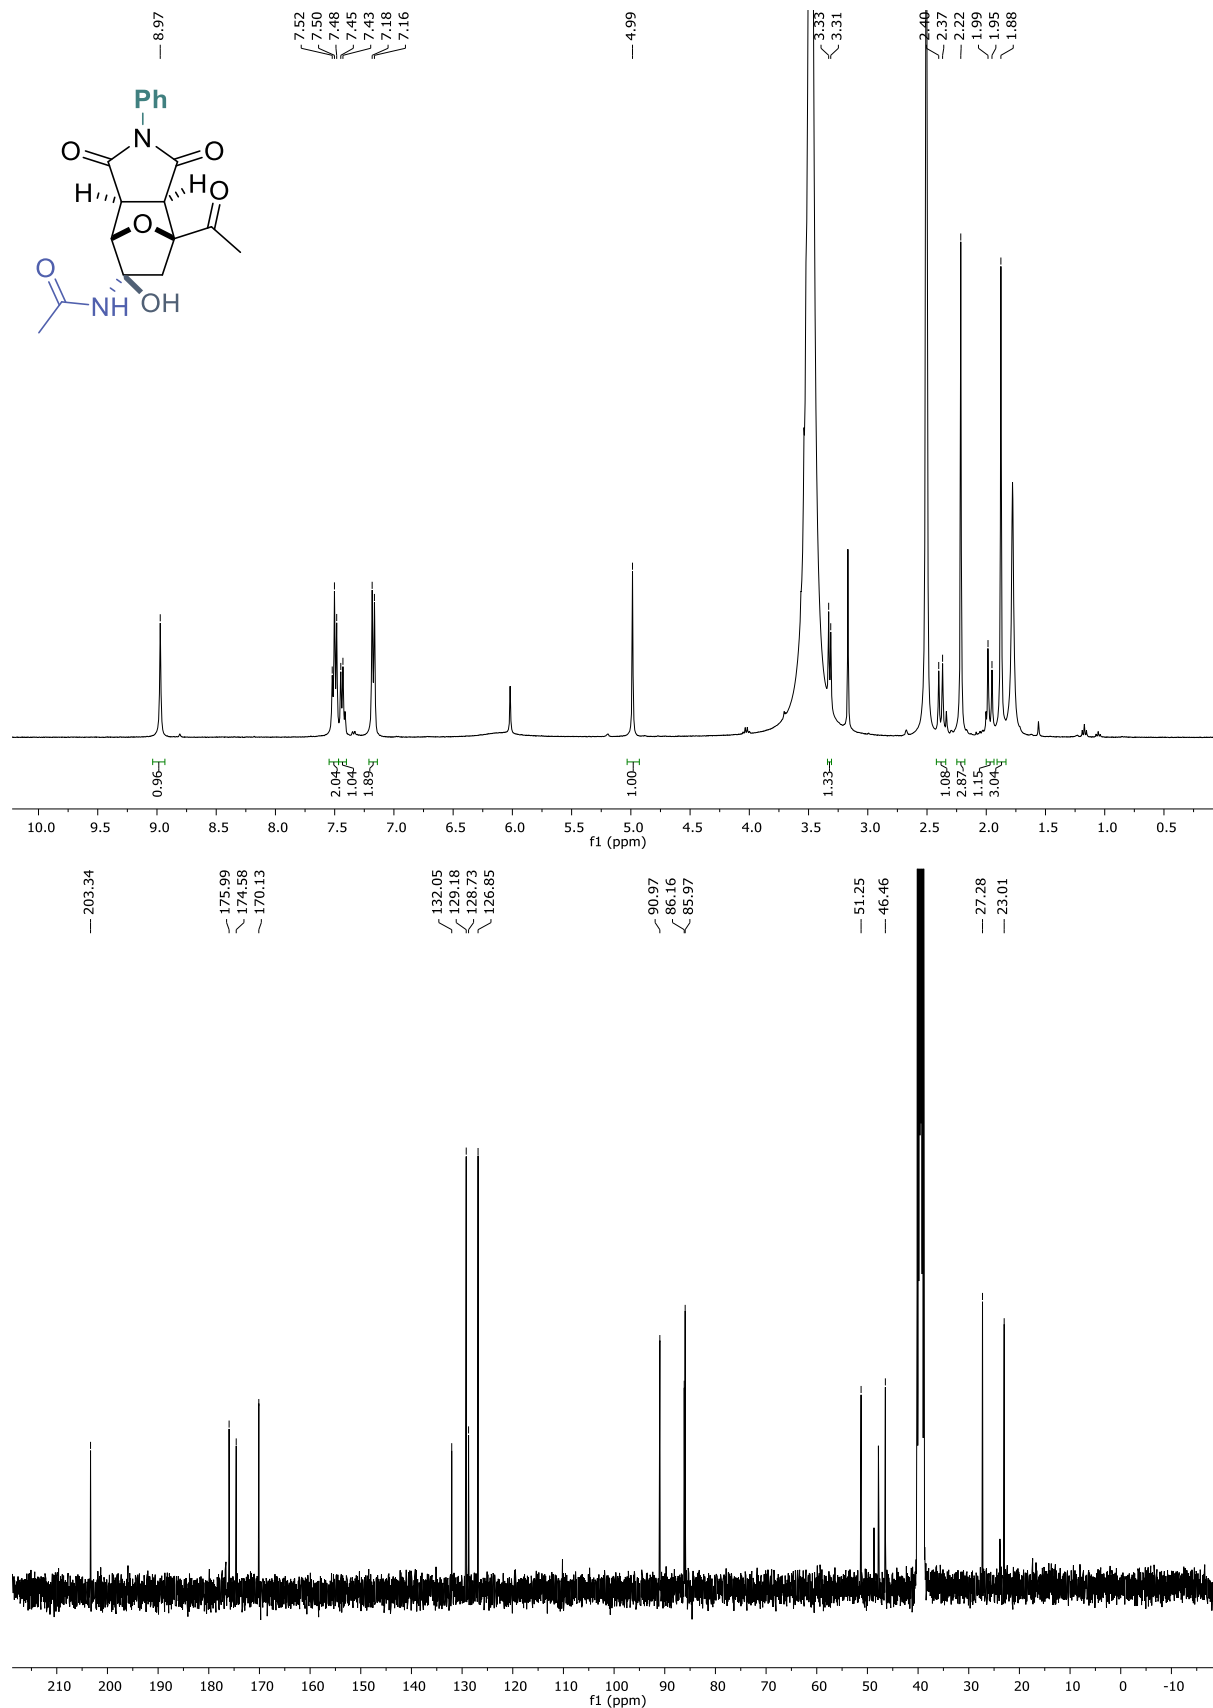

**<sup>1</sup>H and <sup>13</sup>C NMR of product 2e**

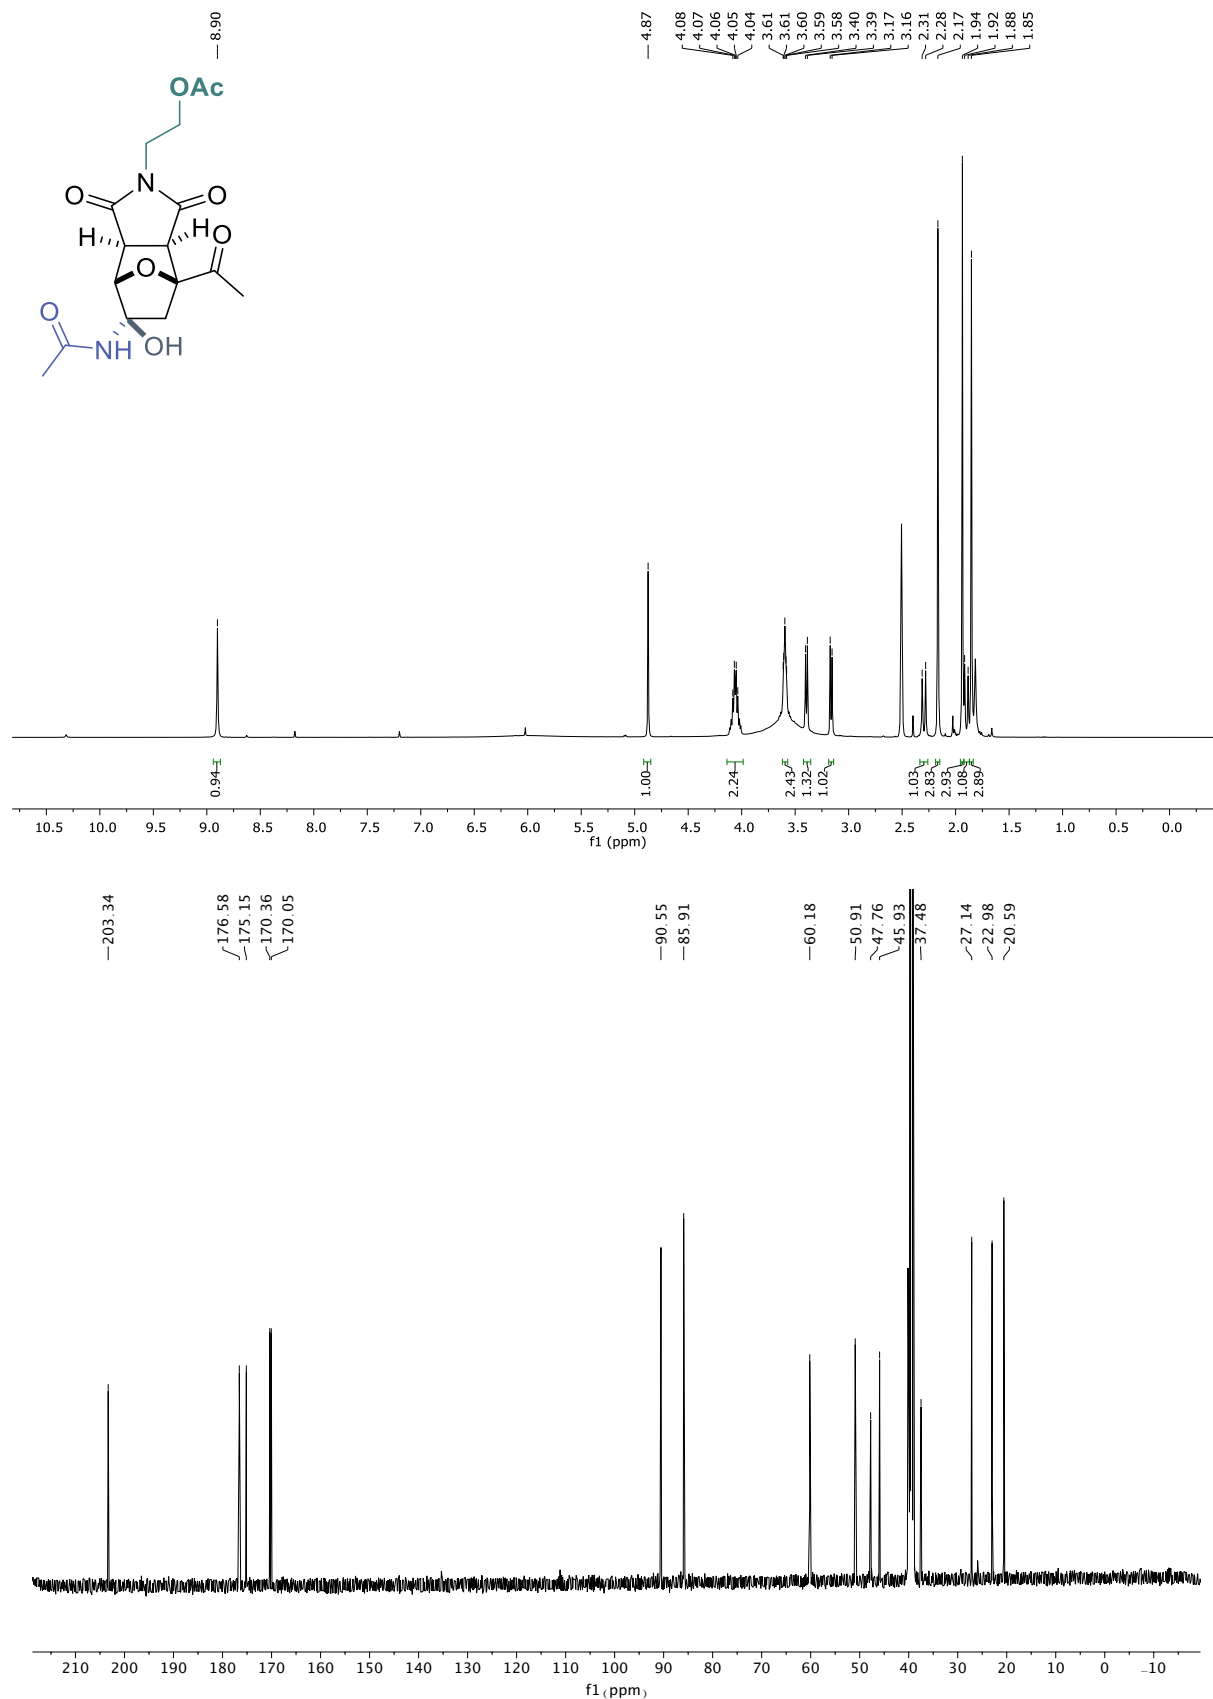



# <sup>1</sup>H and <sup>13</sup>C NMR of product 2f

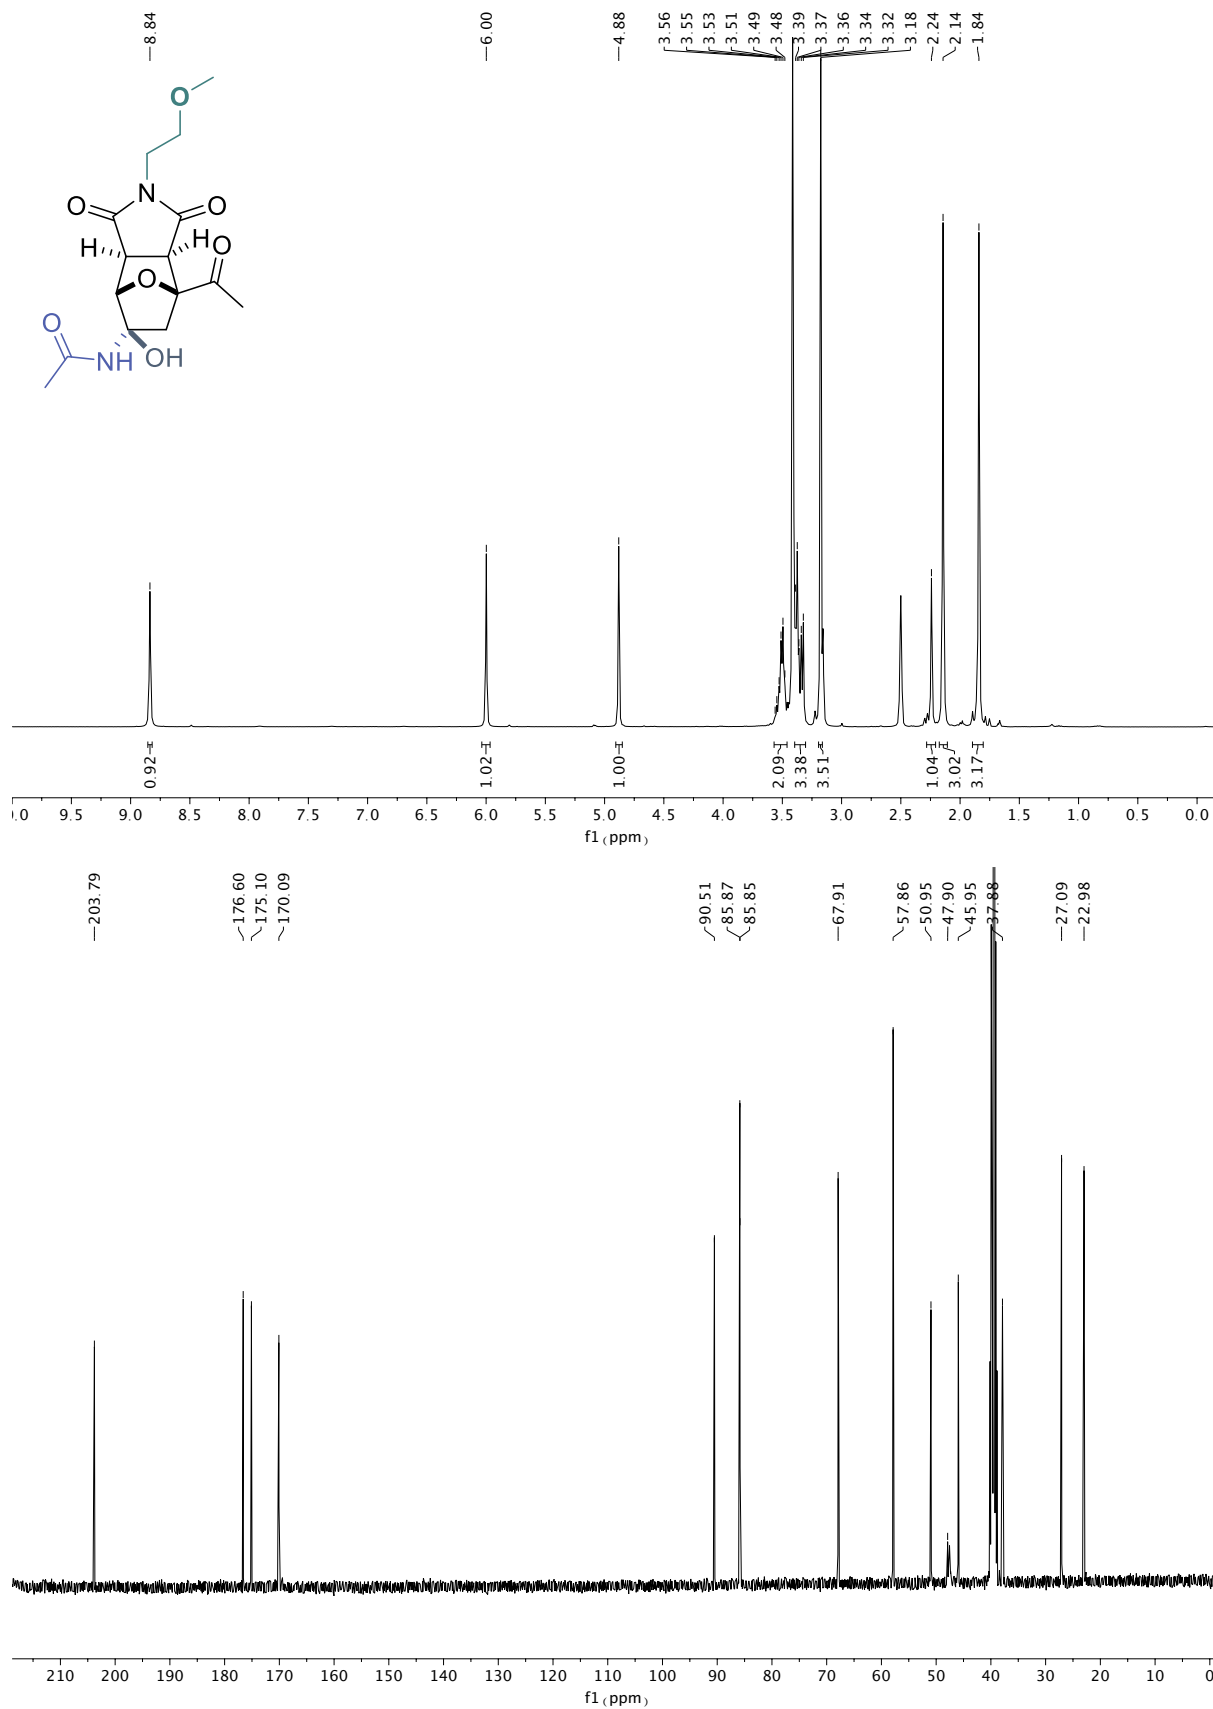

# HSQC and HMBC of product 2f

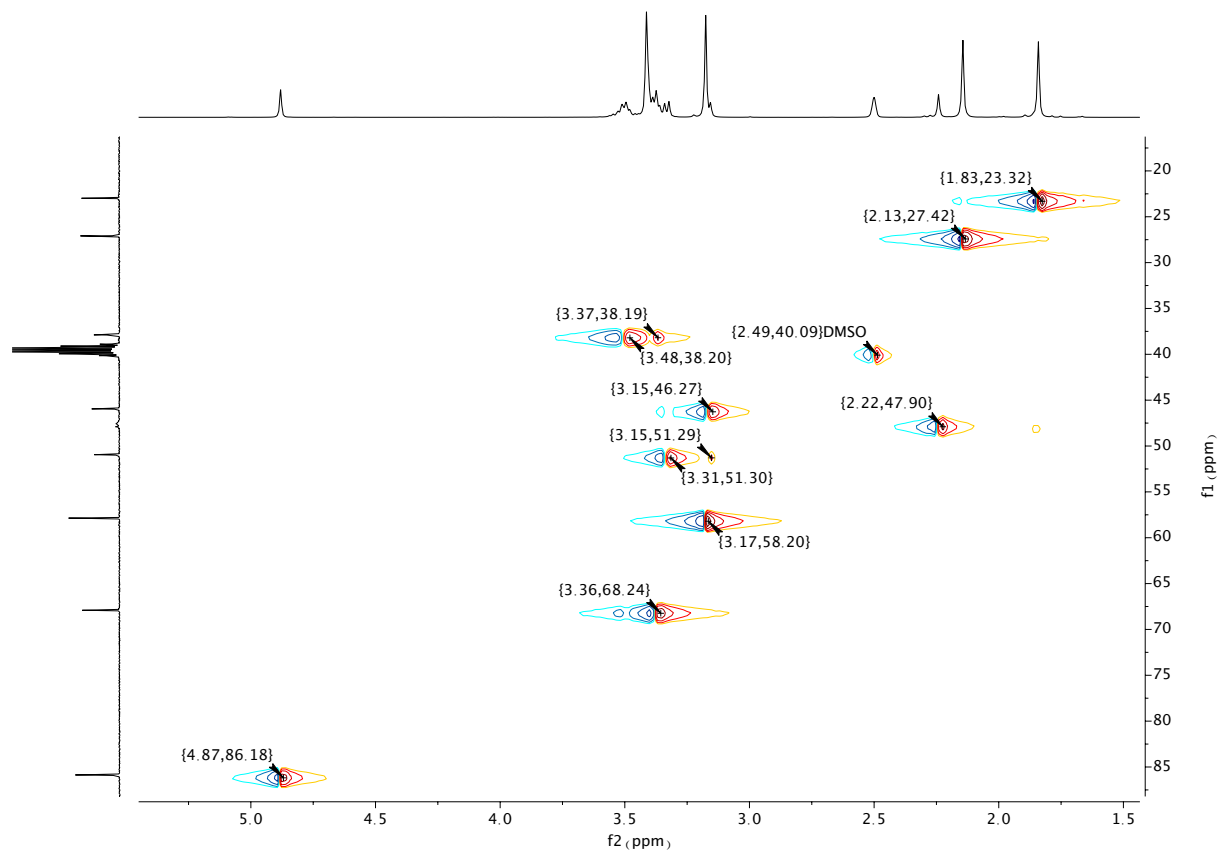

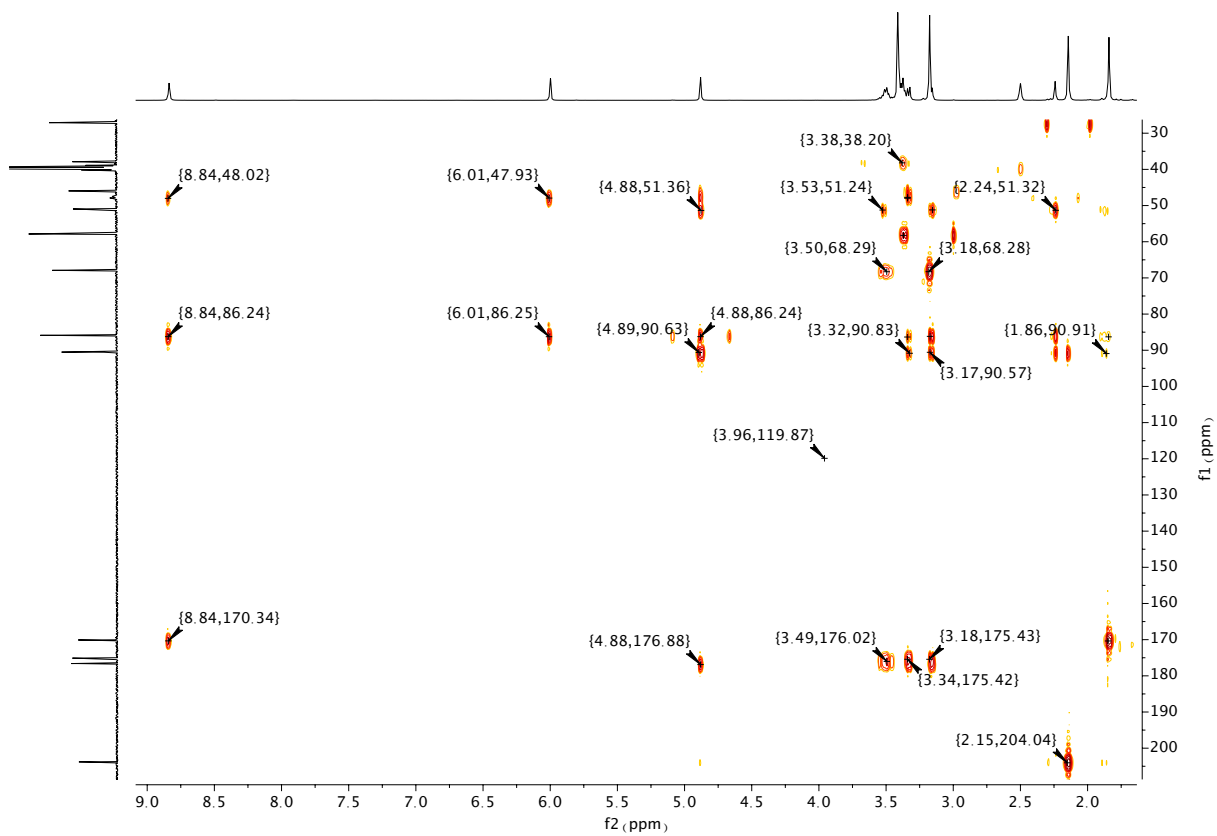

# <sup>1</sup>H and <sup>13</sup>C NMR of product 2g

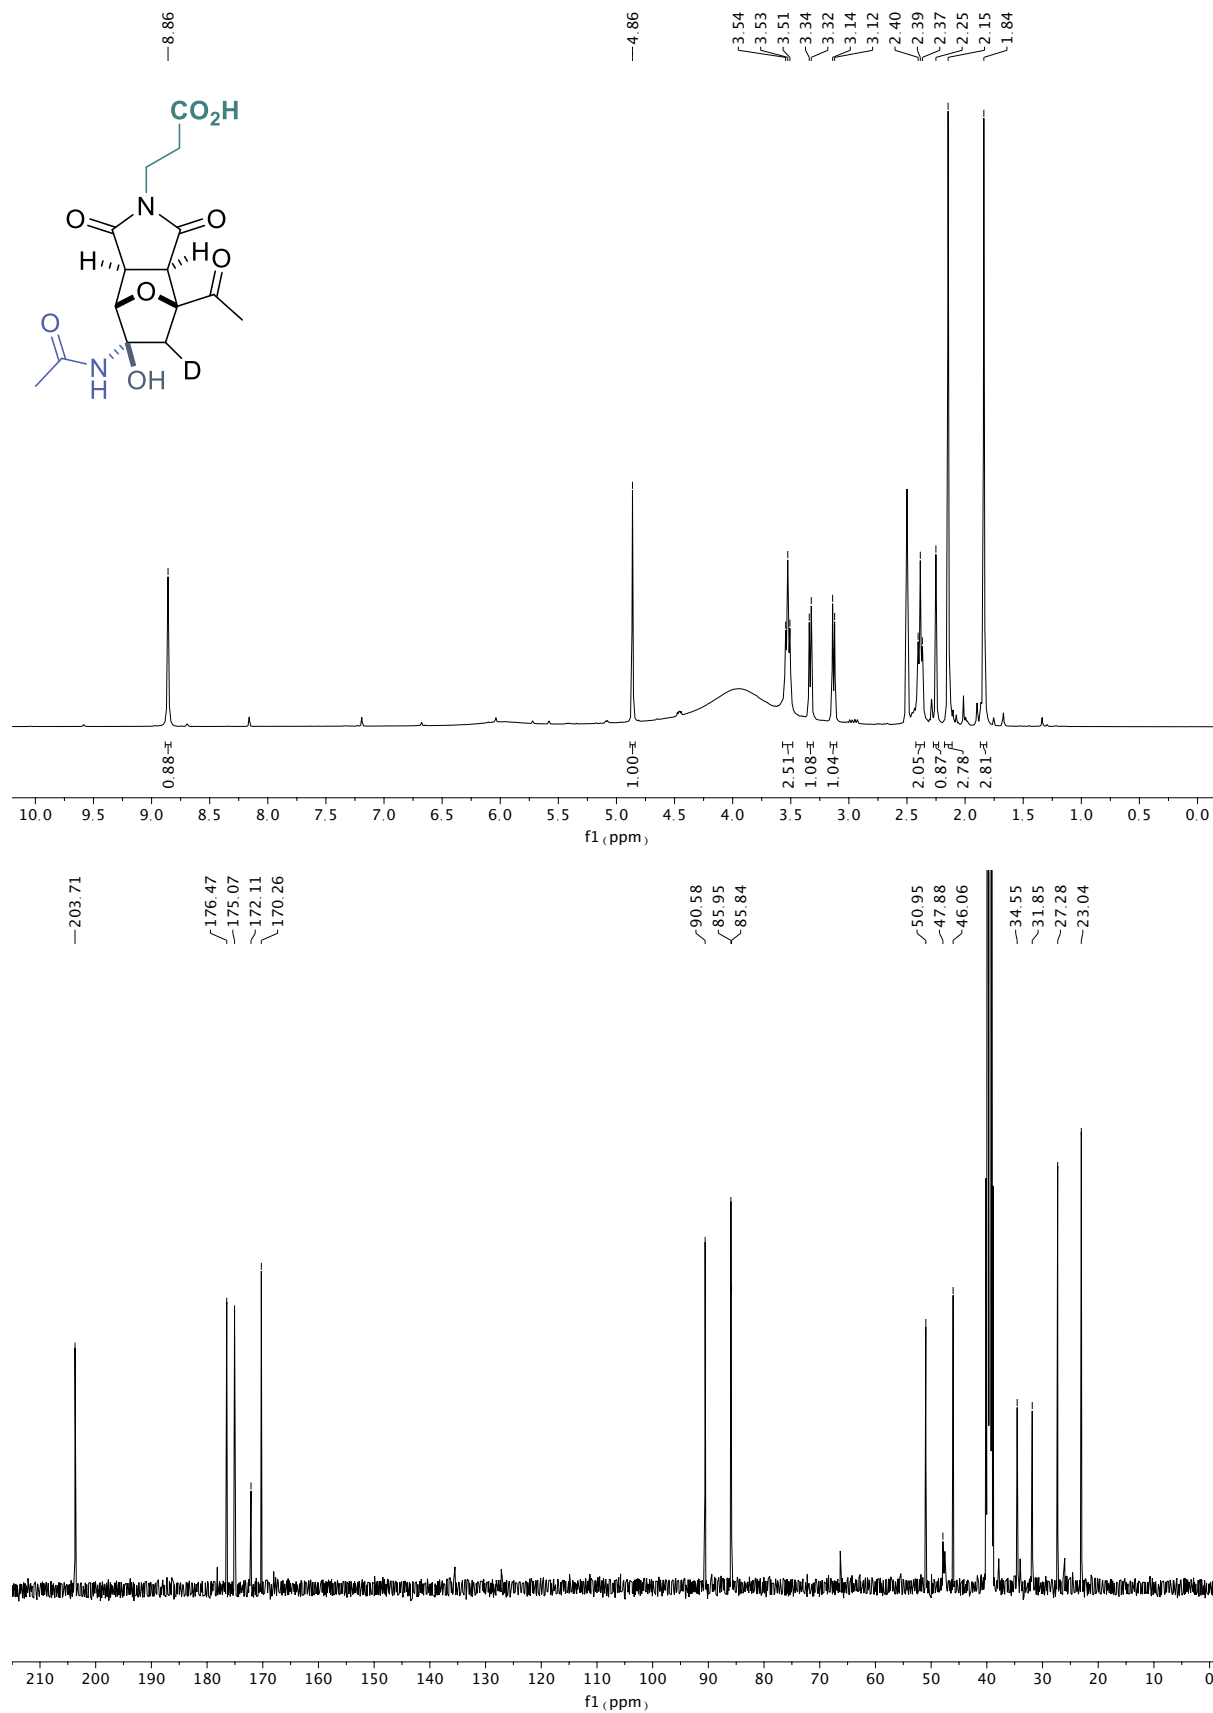

# HSQC and HMBC of product 2g

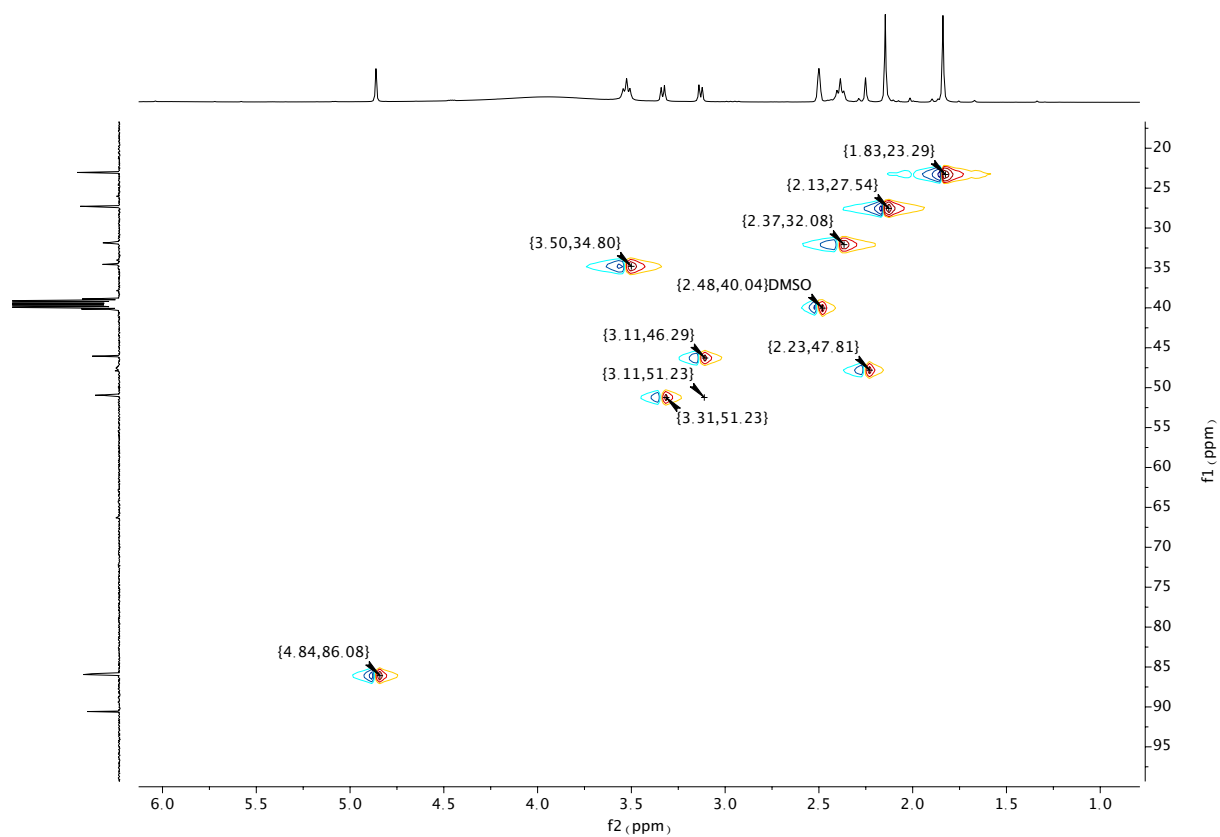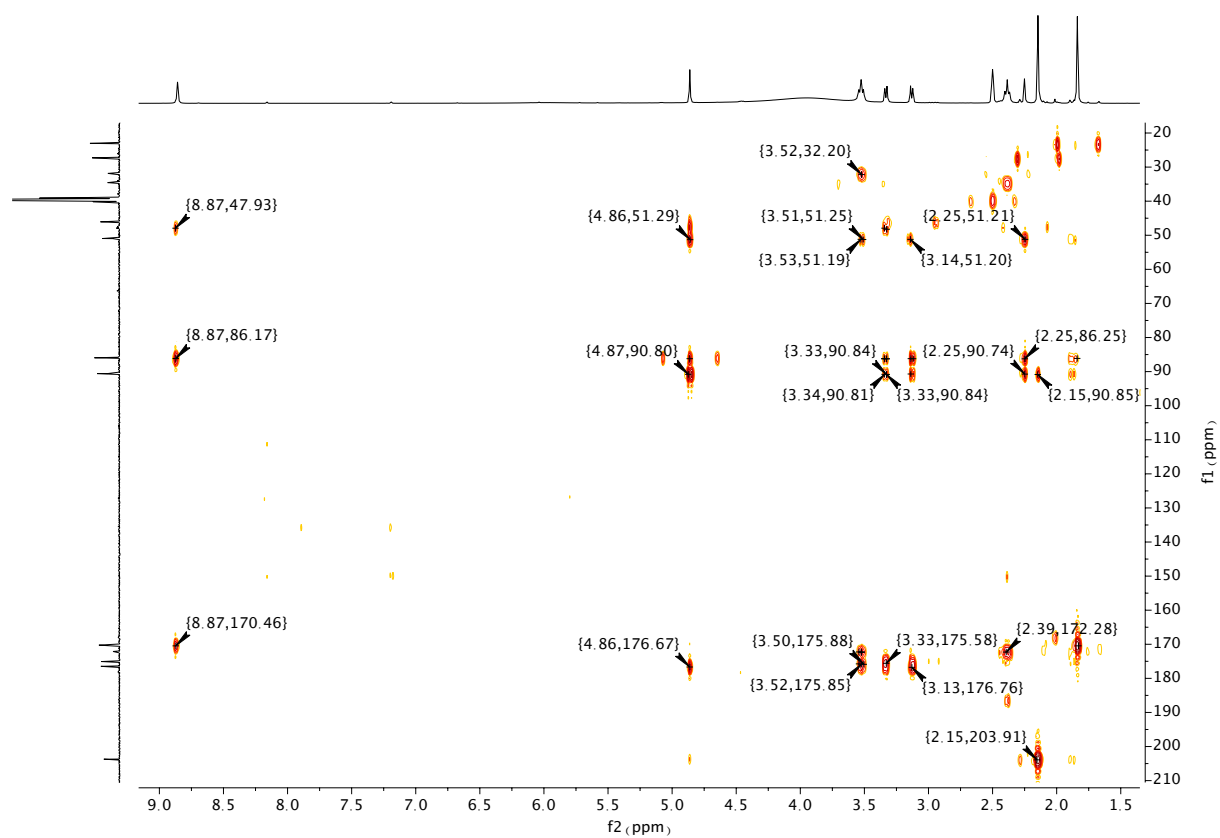

# <sup>1</sup>H and <sup>13</sup>C NMR of product 2h

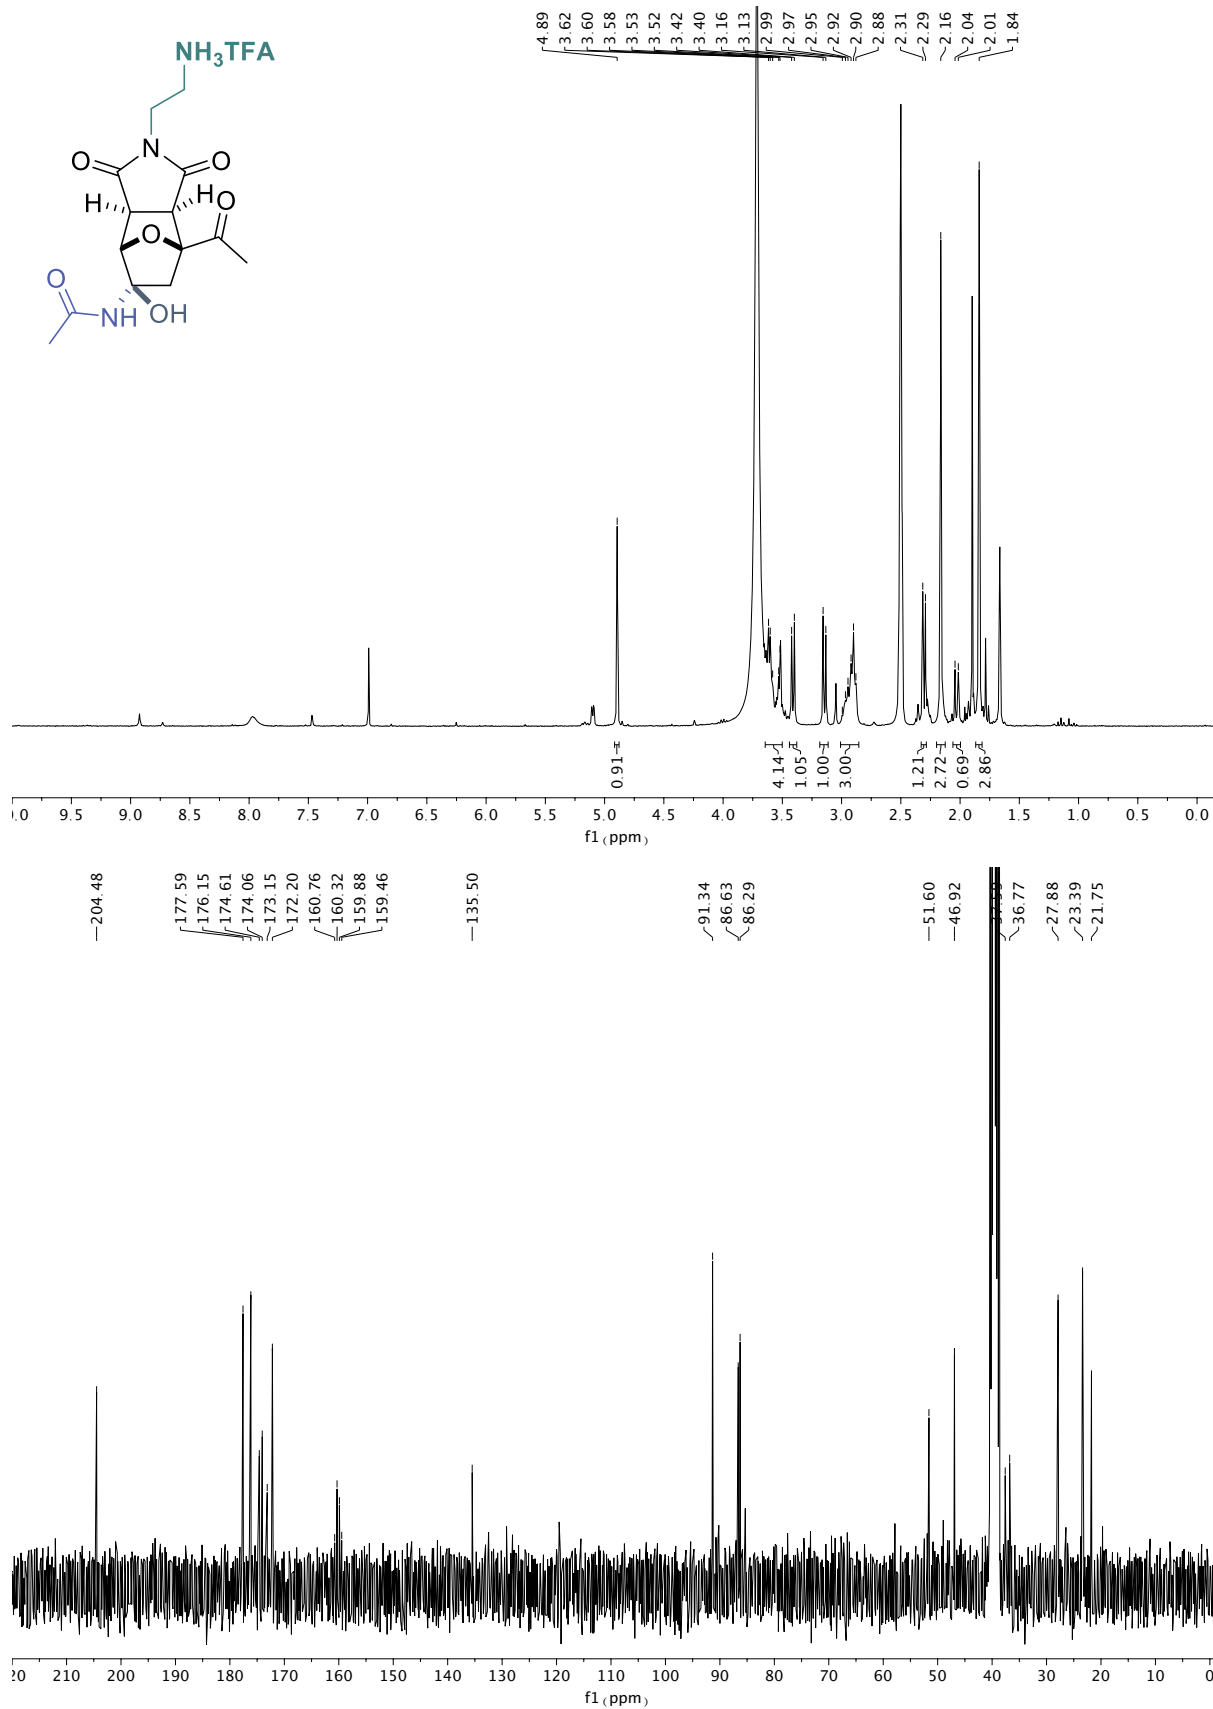

# <sup>1</sup>H and <sup>13</sup>C NMR of product 3

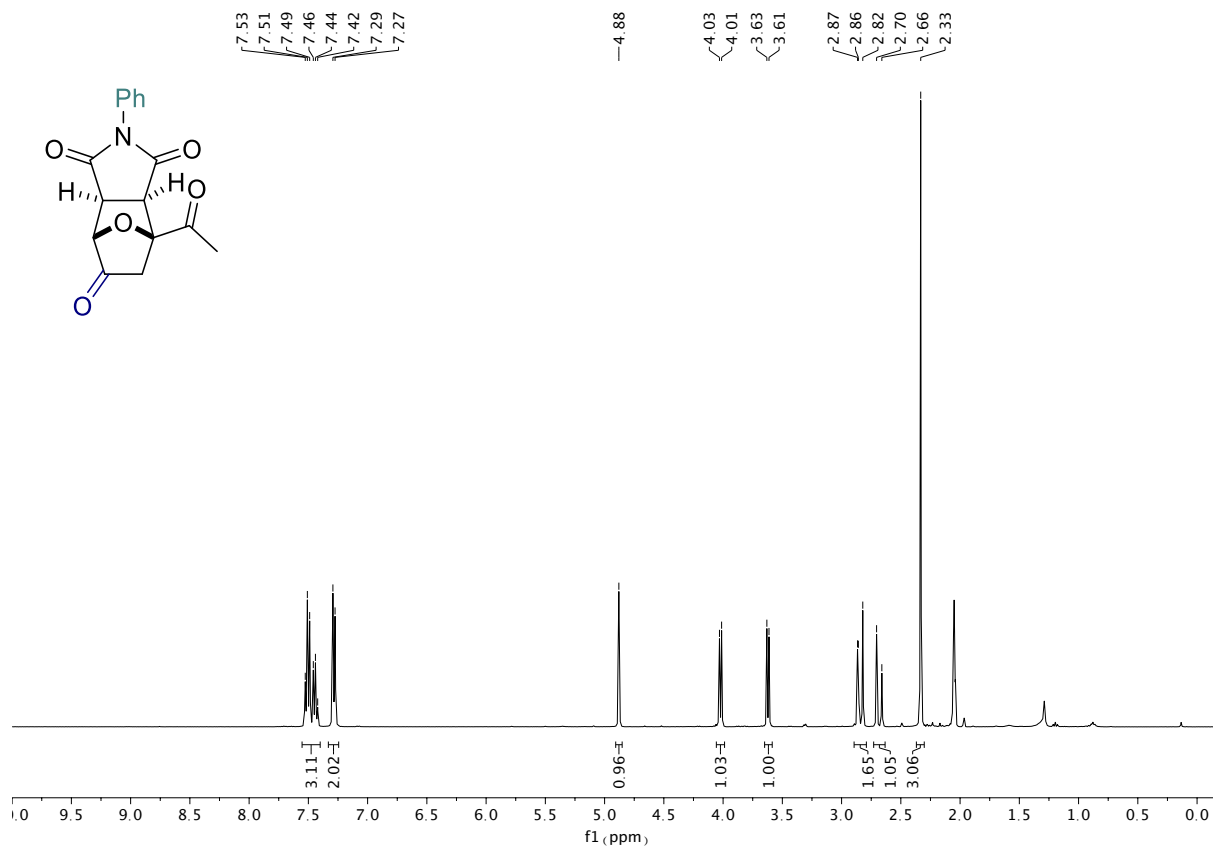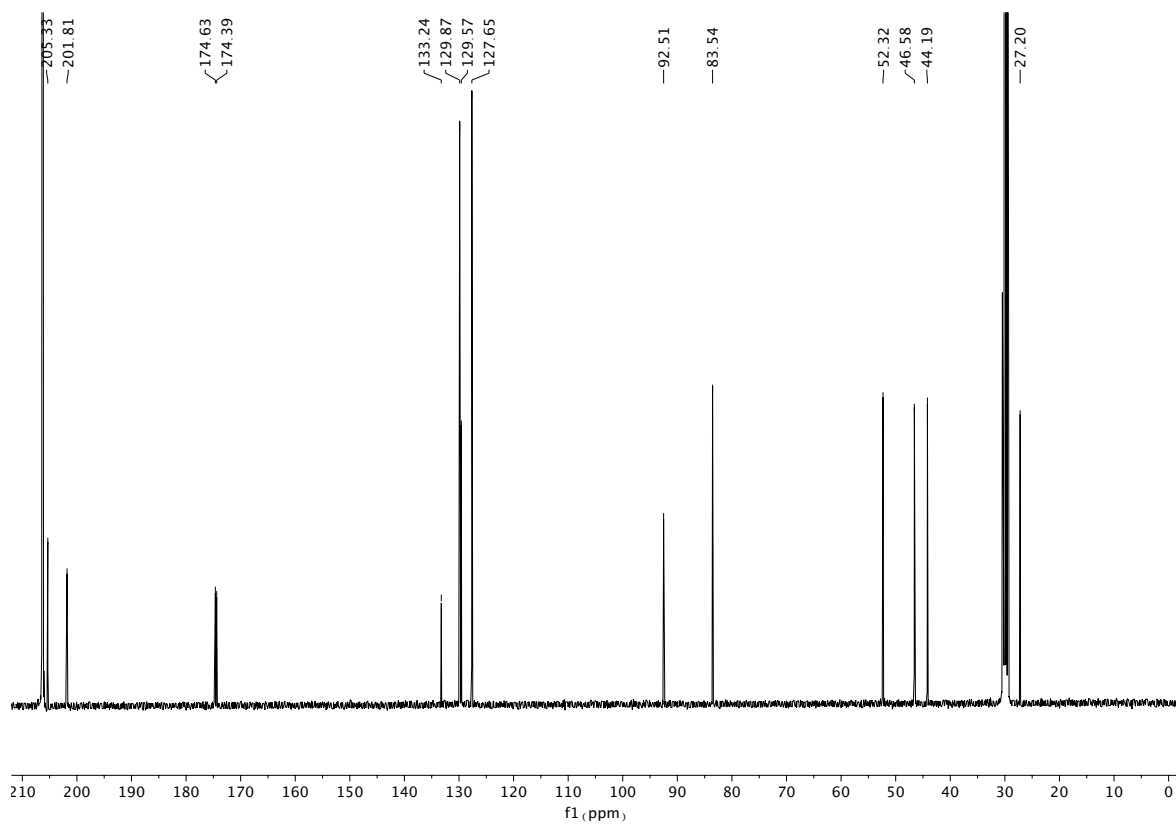

**<sup>1</sup>H and <sup>13</sup>C NMR of product 4**

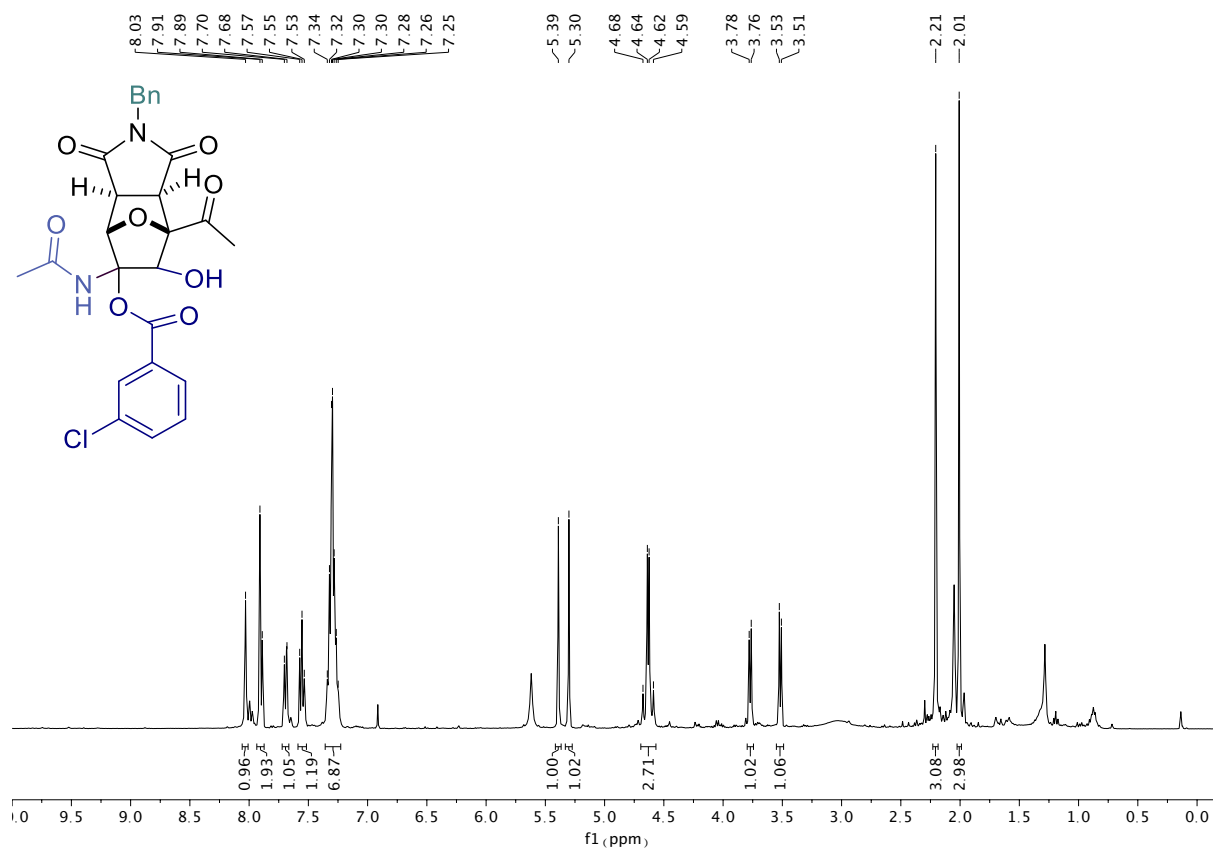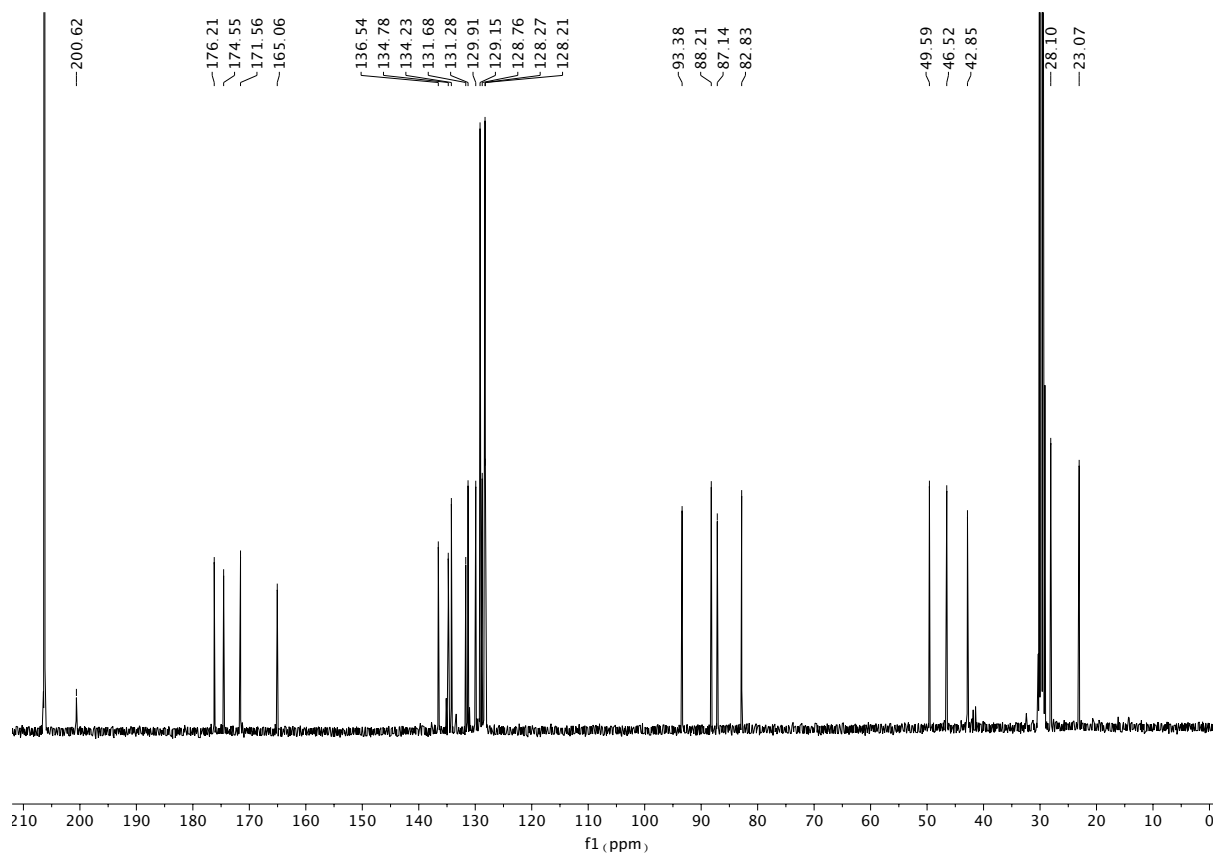



# HSQC and HMBC of product 4

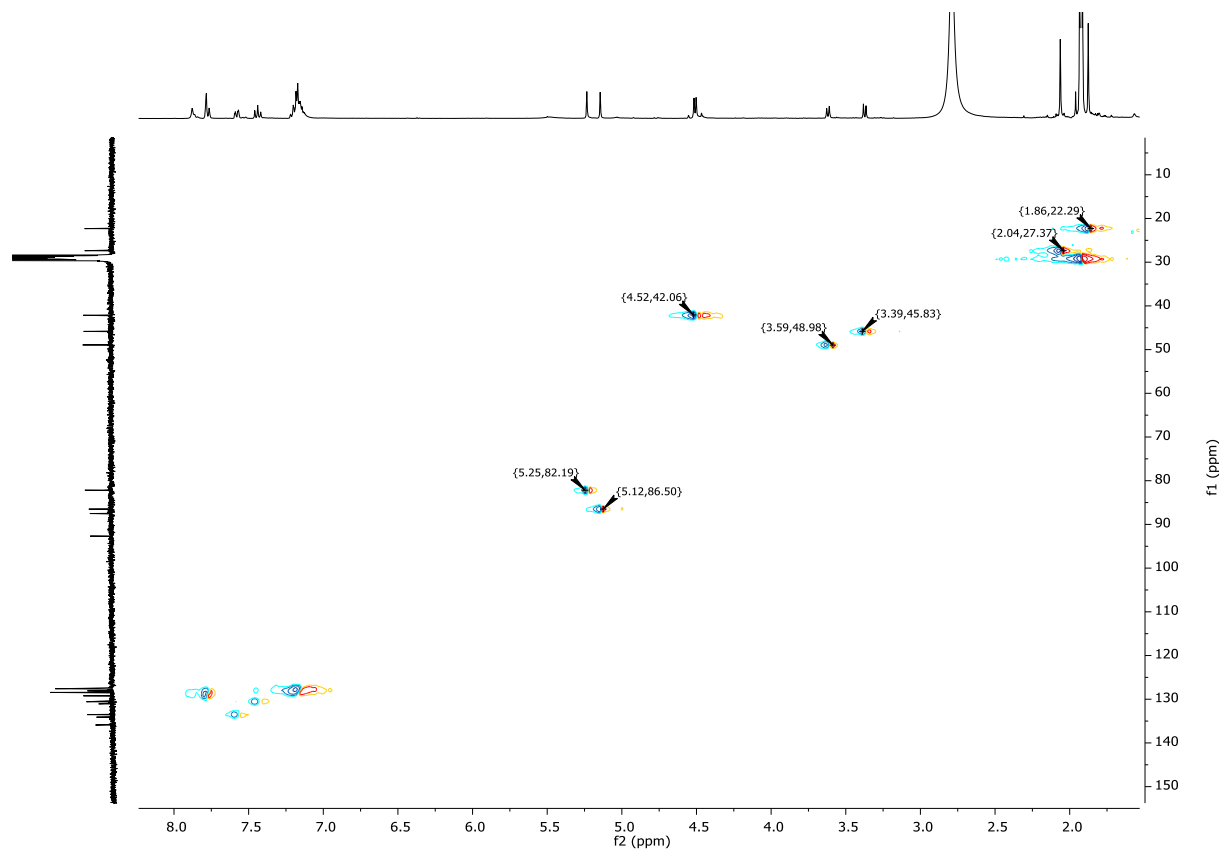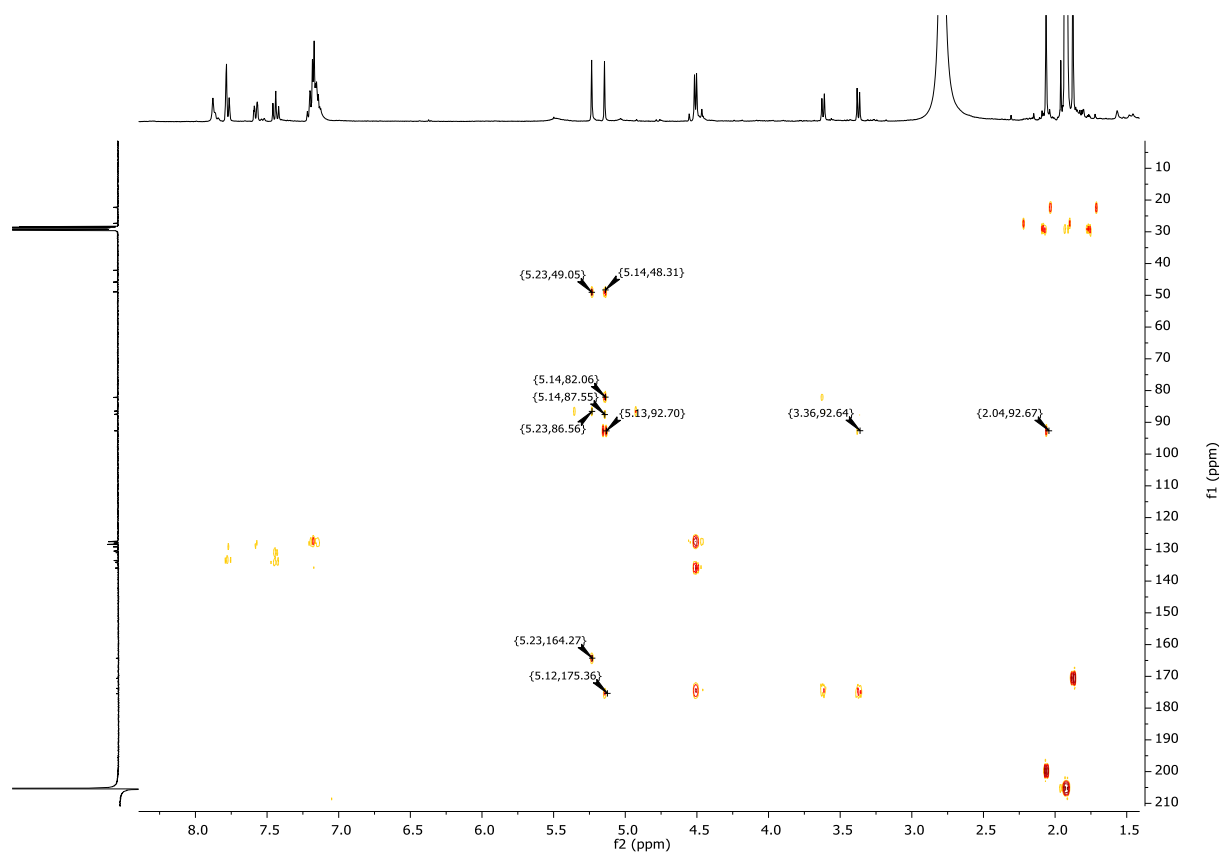

# NOESY and attributed correlations of product 4

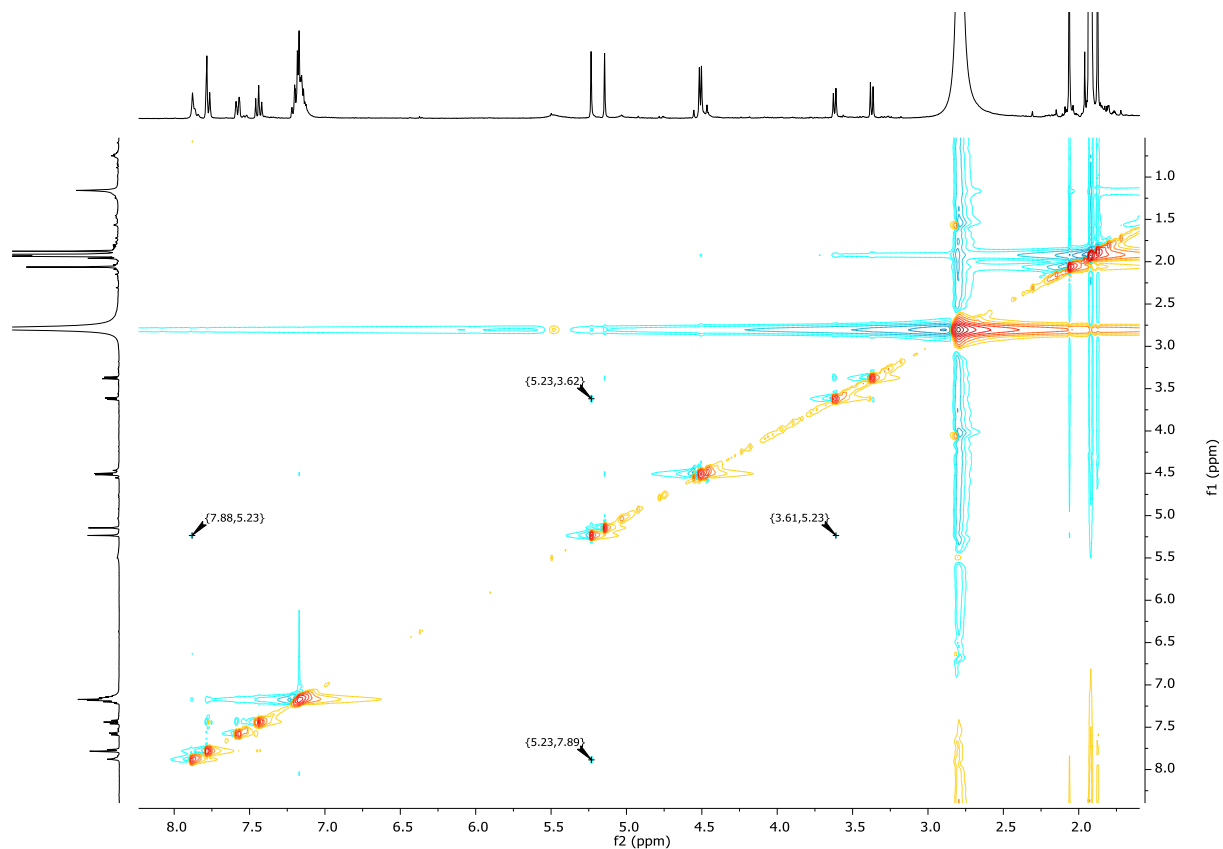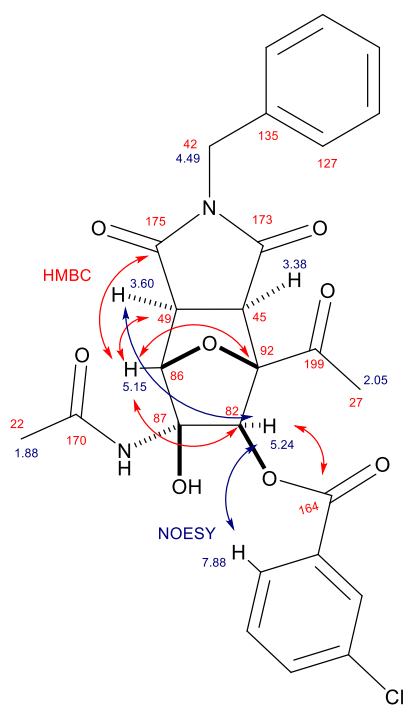

**<sup>1</sup>H and <sup>13</sup>C NMR of product 5**

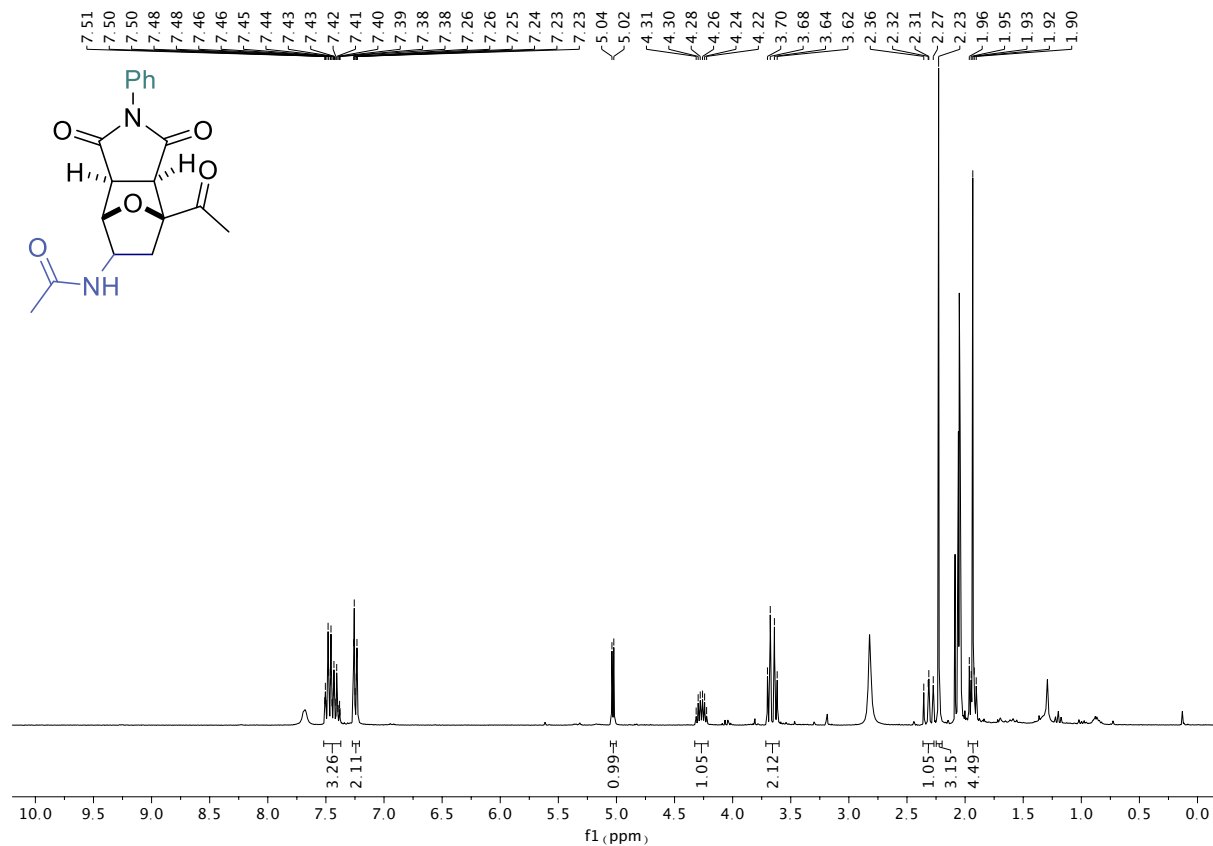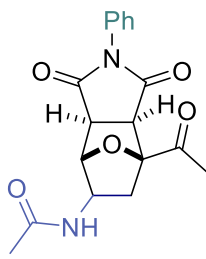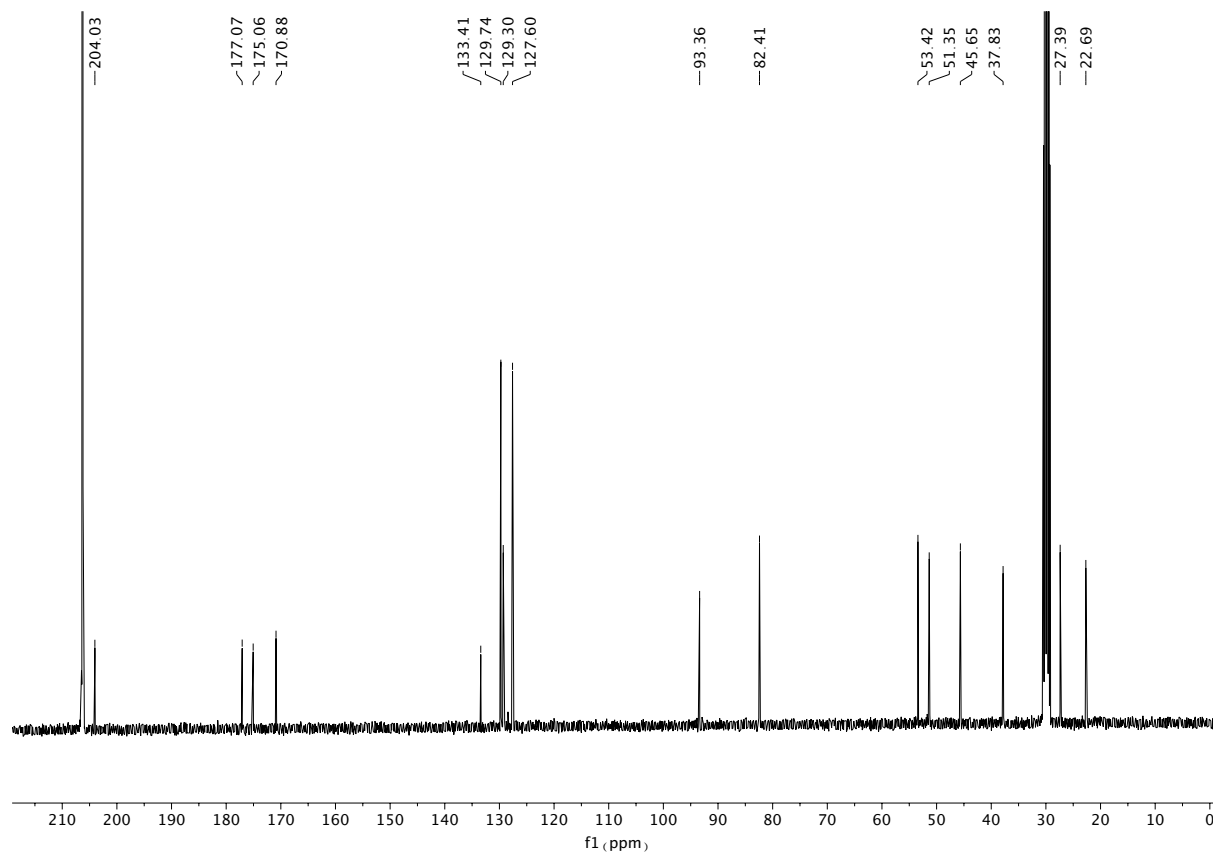

# <sup>1</sup>H and <sup>13</sup>C NMR of product 8

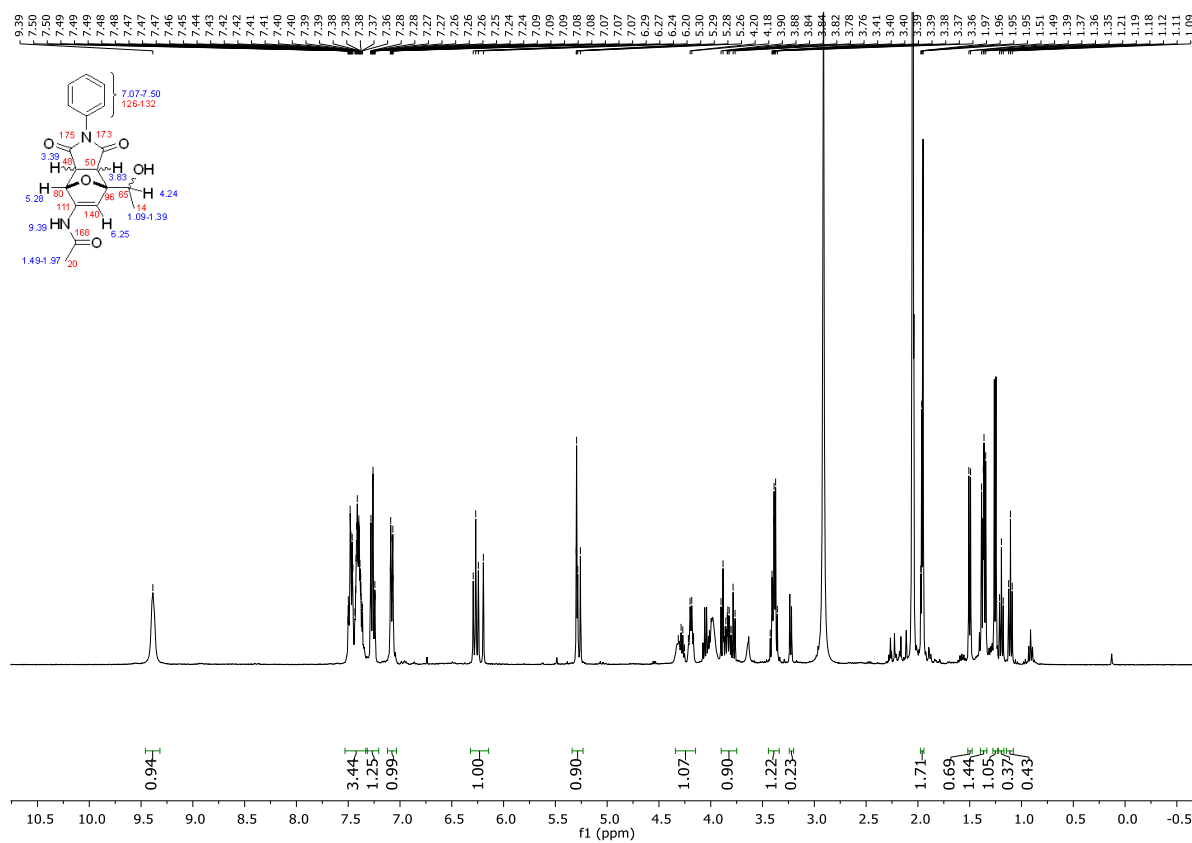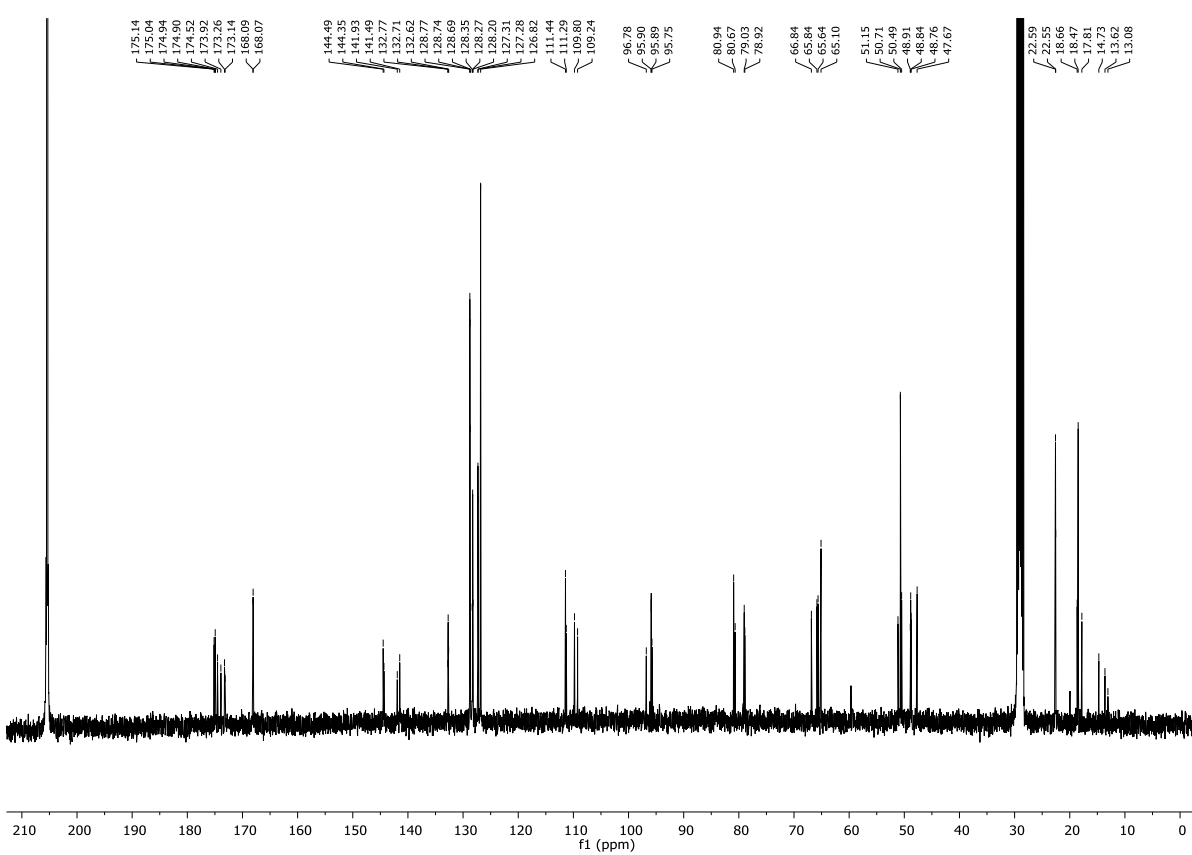

# <sup>1</sup>H and <sup>13</sup>C NMR of 1-(2-methoxyethyl)-1H-pyrrole-2,5-dione

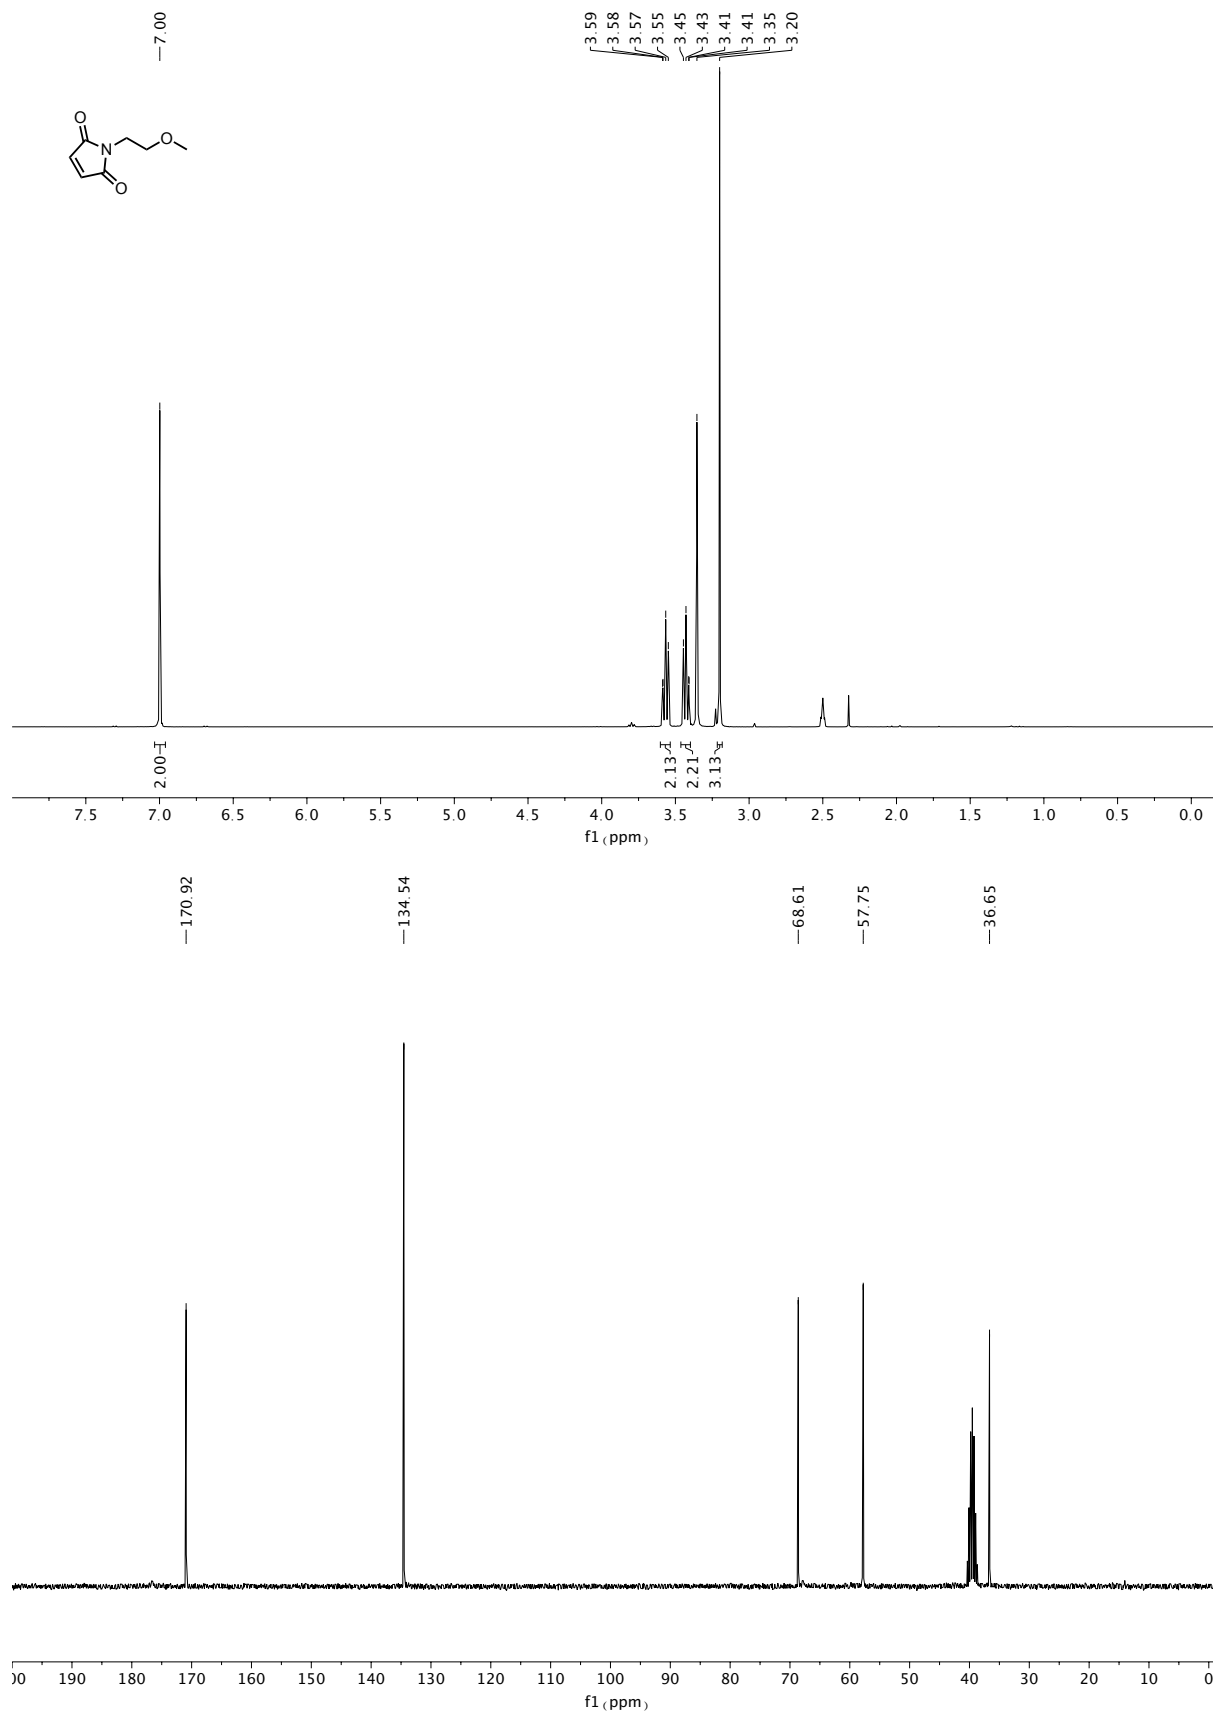

## References

1. Padovan, Daniele; Kobayashi, Hirokazu and Fukuoka, A. Facile Preparation of 3-Acetamido-5-acetylfuran from N-Acetyl-d-glucosamine by using Commercially Available Aluminum Salts. *ChemSusChem* **13**, 3594–3598 (2020).
2. Pham, Thuy; Lindsay, Ashley; Kim, Shi-Wei; Persello, Laly; Chen, Xi; Yan, Ning; Sperry, Jonathan; Two-Step Preparation of Diverse 3-Amidofurans from Chitin. *ChemistrySelect*, **4**, 10097, (2019)
3. Zhu, Qiwen; Bao, Bin; Zhang, Qiumeng; Yu, Jiahui; Lu, Wei; Maleimidation of dextran and the application in designing a dextran–camptothecin conjugate. *RSC Adv.*, **8**, 2818, (2018)
